# Supplementary material
Source: publisher figshare collection journal article supplement (https://frontiersin.figshare.com/ndownloader/files/15203987)
Supplement: Supplementary file 1 [file 15203987]

## Sheet: datasheet 3
Datasheet 3: Reaction times and Accuracy
subject	trial	rts	accuracy	condition	related	list	item	lang	target.freq	log.targ.freq	zRT	logRT
kc02	27	802	1	Sem	unrel	v1-1	D073	L1	16.76	2.819	-0.123165	6.68711
kc02	31	1128	1	Orth	unrel	v1-1	D055	L1	0.47	-0.755023	1.30971	7.0282
kc02	33	838	1	Orth	rel	v1-1	D043	L1	2.64	0.970779	0.0350662	6.73102
kc02	35	885	1	Orth	rel	v1-1	D069	L1	83.58	4.4258	0.241646	6.78559
kc02	41	1073	1	Sem	unrel	v1-1	D107	L1	3.45	1.23837	1.06796	6.97821
kc02	43	912	1	ID	unrel	v1-1	D135	L1	37.3	3.61899	0.360319	6.81564
kc02	47	1118	1	Sem	rel	v1-1	D098	L1	8.72	2.16562	1.26575	7.0193
kc02	51	1115	1	ID	unrel	v1-1	D121	L1	9.8	2.28238	1.25257	7.01661
kc02	57	767	1	Orth	rel	v1-1	D037	L1	257.57	5.55129	-0.277001	6.64249
kc02	63	787	1	ID	rel	v1-1	D126	L1	168.78	5.1286	-0.189095	6.66823
kc02	65	858	1	Morph	unrel	v1-1	D023	L1	3.83	1.34286	0.122972	6.7546
kc02	67	721	1	Morph	unrel	v1-1	D002	L1	16.96	2.83086	-0.479185	6.58064
kc02	75	908	1	Sem	unrel	v1-1	D088	L1	2.03	0.708036	0.342738	6.81124
kc02	81	672	1	Sem	rel	v1-1	D086	L1	24.19	3.18594	-0.694555	6.51026
kc02	83	807	1	Morph	unrel	v1-1	D017	L1	27.36	3.30908	-0.101188	6.69332
kc02	91	698	1	Morph	rel	v1-1	D015	L1	11.82	2.46979	-0.580277	6.54822
kc02	97	742	1	Morph	unrel	v1-1	D007	L1	1.69	0.524729	-0.386884	6.60935
kc02	103	738	1	Sem	unrel	v1-1	D093	L1	11.49	2.44148	-0.404465	6.60394
kc02	111	749	1	Sem	unrel	v1-1	D092	L1	20.07	2.99923	-0.356116	6.61874
kc02	119	848	1	Morph	rel	v1-1	D009	L1	6.08	1.805	0.0790193	6.74288
kc02	125	644	1	Orth	unrel	v1-1	D045	L1	30.88	3.43011	-0.817624	6.4677
kc02	129	1186	1	Sem	rel	v1-1	D105	L1	163.78	5.09852	1.56463	7.07834
kc02	131	640	1	ID	rel	v1-1	D132	L1	41.49	3.72545	-0.835205	6.46147
kc02	139	923	1	ID	rel	v1-1	D115	L1	13.18	2.5787	0.408668	6.82763
kc02	147	814	1	Orth	rel	v1-1	D054	L1	70.34	4.25334	-0.0704212	6.70196
kc02	153	778	1	Sem	rel	v1-1	D094	L1	12.77	2.5471	-0.228652	6.65673
kc02	157	664	1	Orth	rel	v1-1	D048	L1	17.77	2.87751	-0.729718	6.49828
kc02	161	1125	1	Sem	rel	v1-1	D091	L1	15.41	2.73502	1.29652	7.02554
kc02	163	636	1	Morph	rel	v1-1	D021	L1	3.11	1.13462	-0.852786	6.4552
kc02	171	719	1	ID	unrel	v1-1	D109	L1	55.14	4.00988	-0.487976	6.57786
kc02	177	651	1	ID	rel	v1-1	D140	L1	16.69	2.81481	-0.786857	6.47851
kc02	183	647	1	Orth	rel	v1-1	D066	L1	27.09	3.29916	-0.804438	6.47235
kc02	185	846	0	ID	rel	v1-1	D136	L1	0.2	-1.60944	0.0702287	6.74052
kc02	187	933	1	Sem	unrel	v1-1	D097	L1	43.85	3.78077	0.452621	6.83841
kc02	191	746	1	Morph	unrel	v1-1	D025	L1	48.85	3.88875	-0.369302	6.61473
kc02	192	625	1	Orth	rel	v1-1	D059	L1	24.3	3.19048	-0.901135	6.43775
kc02	195	656	1	Morph	unrel	v1-1	D019	L1	0.47	-0.755023	-0.76488	6.48616
kc02	201	708	1	Morph	rel	v1-1	D005	L1	2.64	0.970779	-0.536324	6.56244
kc02	203	731	1	Orth	rel	v1-1	D053	L1	31.96	3.46449	-0.435232	6.59441
kc02	207	648	1	Morph	rel	v1-1	D014	L1	19.66	2.97859	-0.800043	6.47389
kc02	209	759	1	Sem	unrel	v1-1	D082	L1	8.18	2.10169	-0.312163	6.632
kc02	213	636	1	Sem	unrel	v1-1	D096	L1	41.15	3.71722	-0.852786	6.4552
kc02	219	761	1	Sem	unrel	v1-1	D081	L1	7.3	1.98787	-0.303373	6.63463
kc02	231	705	1	Morph	unrel	v1-1	D003	L1	1.15	0.139762	-0.54951	6.5582
kc02	237	773	1	Orth	unrel	v1-1	D061	L1	17.03	2.83498	-0.250629	6.65028
kc02	239	788	1	Orth	rel	v1-1	D064	L1	164.12	5.1006	-0.184699	6.6695
kc02	243	665	1	ID	rel	v1-1	D143	L1	50.54	3.92277	-0.725322	6.49979
kc02	249	870	1	ID	unrel	v1-1	D139	L1	2.03	0.708036	0.175716	6.76849
kc02	253	1171	1	Orth	rel	v1-1	D071	L1	0.68	-0.385662	1.4987	7.06561
kc02	259	1047	1	ID	rel	v1-1	D119	L1	20	2.99573	0.953686	6.95368
kc02	265	899	1	Morph	rel	v1-1	D010	L1	17.03	2.83498	0.30318	6.80128
kc02	267	762	1	ID	unrel	v1-1	D117	L1	2.36	0.858662	-0.298977	6.63595
kc02	273	718	1	Sem	unrel	v1-1	D074	L1	9.26	2.2257	-0.492371	6.57647
kc02	279	867	1	ID	unrel	v1-1	D120	L1	10.14	2.31649	0.16253	6.76504
kc02	283	712	1	Orth	rel	v1-1	D070	L1	8.11	2.0931	-0.518743	6.56808
kc02	285	831	1	ID	rel	v1-1	D112	L1	19.05	2.94707	0.00429906	6.72263
kc02	287	702	1	Orth	rel	v1-1	D047	L1	17.77	2.87751	-0.562696	6.55393
kc02	291	763	1	Orth	unrel	v1-1	D050	L1	28.38	3.34568	-0.294582	6.63726
kc02	295	752	1	ID	unrel	v1-1	D123	L1	16.82	2.82257	-0.34293	6.62274
kc02	297	919	1	Orth	rel	v1-1	D067	L1	18.45	2.91506	0.391086	6.82329
kc02	300	613	1	Orth	rel	v1-1	D060	L1	10.41	2.34277	-0.953878	6.41836
kc02	303	715	1	ID	rel	v1-1	D113	L1	9.32	2.23216	-0.505557	6.57228
kc02	305	698	1	Sem	rel	v1-1	D079	L1	18.65	2.92585	-0.580277	6.54822
kc02	314	670	1	Sem	unrel	v1-1	D104	L1	29.26	3.37622	-0.703346	6.50728
kc02	317	534	1	ID	rel	v1-1	D138	L1	19.59	2.97502	-1.30111	6.2804
kc02	320	832	0	Sem	rel	v1-1	D108	L1	1.76	0.565314	0.00869437	6.72383
kc02	326	756	1	Morph	rel	v1-1	D035	L1	8.58	2.14943	-0.325349	6.62804
kc02	328	835	1	Morph	unrel	v1-1	D018	L1	7.57	2.02419	0.0218803	6.72743
kc02	331	600	1	ID	unrel	v1-1	D144	L1	0.68	-0.385662	-1.01102	6.39693
kc02	338	901	1	Morph	rel	v1-1	D036	L1	10.34	2.33602	0.311971	6.80351
kc02	341	578	1	Morph	rel	v1-1	D016	L1	178.04	5.18201	-1.10771	6.35957
kc02	345	607	1	Orth	rel	v1-1	D072	L1	82.5	4.4128	-0.98025	6.40853
kc02	348	1110	1	Sem	rel	v1-1	D080	L1	149.26	5.00569	1.23059	7.01212
kc02	352	636	1	Sem	unrel	v1-1	D085	L1	54.12	3.9912	-0.852786	6.4552
kc02	356	993	1	Sem	rel	v1-1	D084	L1	19.19	2.95439	0.716339	6.90073
kc02	358	1328	1	Morph	rel	v1-1	D033	L1	66.69	4.20006	2.18877	7.19143
kc02	364	956	1	Orth	unrel	v1-1	D041	L1	29.8	3.39451	0.553713	6.86276
kc02	372	887	1	ID	unrel	v1-1	D137	L1	3.72	1.31372	0.250436	6.78784
kc02	384	743	1	Orth	rel	v1-1	D044	L1	10.1	2.31254	-0.382488	6.6107
kc02	386	918	1	ID	unrel	v1-1	D129	L1	1.55	0.438255	0.386691	6.8222
kc02	392	1274	0	ID	unrel	v1-1	D116	L1	21.62	3.07362	1.95142	7.14992
kc02	394	713	1	ID	unrel	v1-1	D142	L1	38.24	3.64388	-0.514348	6.56948
kc02	396	992	1	Morph	rel	v1-1	D001	L1	28.51	3.35025	0.711944	6.89972
kc02	404	787	1	Orth	rel	v1-1	D039	L1	12.64	2.53687	-0.189095	6.66823
kc02	408	744	1	Morph	unrel	v1-1	D034	L1	18.65	2.92585	-0.378093	6.61204
kc02	410	1023	1	Morph	unrel	v1-1	D013	L1	2.03	0.708036	0.848199	6.93049
kc02	411	614	1	Morph	unrel	v1-1	D026	L1	38.99	3.66331	-0.949483	6.41999
kc02	420	713	1	Morph	unrel	v1-1	D008	L1	24.86	3.21326	-0.514348	6.56948
kc02	422	1303	1	Orth	unrel	v1-1	D068	L1	7.97	2.07568	2.07889	7.17242
kc02	426	1229	1	ID	rel	v1-1	D131	L1	3.51	1.25562	1.75363	7.11396
kc02	430	1002	1	Orth	unrel	v1-1	D065	L1	0.14	-1.96611	0.755897	6.90975
kc02	432	641	1	Morph	unrel	v1-1	D030	L1	4.66	1.53902	-0.83081	6.46303
kc02	434	664	1	Sem	rel	v1-1	D106	L1	18.38	2.91126	-0.729718	6.49828
kc02	440	652	1	Morph	unrel	v1-1	D006	L1	40.47	3.70056	-0.782461	6.48004
kc02	442	979	1	Sem	unrel	v1-1	D075	L1	11.89	2.4757	0.654805	6.88653
kc02	444	666	1	ID	rel	v1-1	D141	L1	10.68	2.36837	-0.720927	6.50129
kc02	450	1134	1	ID	rel	v1-1	D118	L1	3.58	1.27536	1.33608	7.03351
kc02	452	1180	1	Orth	rel	v1-1	D058	L1	15.14	2.71734	1.53826	7.07327
kc02	458	793	1	Orth	rel	v1-1	D038	L1	0.273	-1.29828	-0.162723	6.67582
kc02	462	774	1	ID	rel	v1-1	D125	L1	5.54	1.71199	-0.246234	6.65157
kc02	468	930	1	Sem	rel	v1-1	D078	L1	13.78	2.62322	0.439435	6.83518
kc02	476	877	1	Orth	unrel	v1-1	D051	L1	0.74	-0.301105	0.206483	6.77651
kc02	480	1251	1	Orth	unrel	v1-1	D049	L1	6.35	1.84845	1.85033	7.1317
kc02	484	848	1	Morph	rel	v1-1	D027	L1	24.93	3.21607	0.0790193	6.74288
kc02	492	779	1	Sem	rel	v1-1	D076	L1	18.24	2.90362	-0.224257	6.65801
kc02	496	993	1	Sem	rel	v1-1	D087	L1	4.86	1.58104	0.716339	6.90073
kc02	504	1356	1	Morph	rel	v1-1	D004	L1	4.8	1.56862	2.31184	7.21229
kc02	506	778	1	Orth	unrel	v1-1	D057	L1	1.22	0.198851	-0.228652	6.65673
kc02	512	830	1	Sem	rel	v1-1	D099	L1	34.66	3.54559	-9.62e-05	6.72143
kc02	520	673	1	Morph	rel	v1-1	D022	L1	5.61	1.72455	-0.69016	6.51175
kc02	522	768	1	Sem	rel	v1-1	D090	L1	14.59	2.68034	-0.272605	6.64379
kc02	526	638	1	Orth	rel	v1-1	D045	L1	30.88	3.43011	-0.843996	6.45834
kc02	530	731	1	ID	rel	v1-1	D124	L1	1.62	0.482426	-0.435232	6.59441
kc02	531	610	1	ID	unrel	v1-1	D132	L1	41.49	3.72545	-0.967064	6.41346
kc02	534	1009	1	ID	unrel	v1-1	D127	L1	10.41	2.34277	0.786664	6.91672
kc02	540	701	1	ID	unrel	v1-1	D115	L1	13.18	2.5787	-0.567091	6.55251
kc02	548	672	1	Sem	rel	v1-1	D089	L1	60.81	4.10775	-0.694555	6.51026
kc02	550	862	1	Sem	unrel	v1-1	D077	L1	1.62	0.482426	0.140554	6.75926
kc02	554	1276	1	ID	rel	v1-1	D114	L1	11.01	2.3988	1.96021	7.15149
kc02	562	679	1	Sem	unrel	v1-1	D100	L1	185.61	5.22365	-0.663788	6.52062
kc02	564	718	1	Morph	unrel	v1-1	D021	L1	3.11	1.13462	-0.492371	6.57647
kc02	570	962	1	Sem	unrel	v1-1	D101	L1	79.05	4.37008	0.580085	6.86901
kc02	572	1128	0	ID	rel	v1-1	D109	L1	55.14	4.00988	1.30971	7.0282
kc02	578	973	1	ID	unrel	v1-1	D140	L1	16.69	2.81481	0.628433	6.88038
kc02	584	1113	1	Morph	rel	v1-1	D032	L1	12.77	2.5471	1.24378	7.01481
kc02	586	960	0	ID	unrel	v1-1	D136	L1	0.2	-1.60944	0.571294	6.86693
kc02	592	1044	1	ID	rel	v1-1	D110	L1	2.91	1.06815	0.9405	6.95081
kc02	600	791	1	Morph	unrel	v1-1	D024	L1	13.45	2.59898	-0.171513	6.6733
kc02	604	598	1	Orth	unrel	v1-1	D053	L1	31.96	3.46449	-1.01981	6.39359
kc02	609	1268	1	Orth	rel	v1-1	D052	L1	0.07	-2.65926	1.92505	7.1452
kc02	611	706	1	Sem	rel	v1-1	D082	L1	8.18	2.10169	-0.545115	6.55962
kc02	615	1216	1	Sem	rel	v1-1	D097	L1	43.85	3.78077	1.69649	7.10332
kc02	619	813	1	Orth	rel	v1-1	D046	L1	0.61	-0.494296	-0.0748165	6.70073
kc02	621	876	1	ID	unrel	v1-1	D128	L1	153.99	5.03689	0.202088	6.77537
kc02	628	591	1	ID	rel	v1-1	D133	L1	11.01	2.3988	-1.05058	6.38182
kc02	632	612	1	Morph	rel	v1-1	D003	L1	1.15	0.139762	-0.958274	6.41673
kc02	639	681	1	Orth	rel	v1-1	D061	L1	17.03	2.83498	-0.654997	6.52356
kc02	641	735	1	Orth	unrel	v1-1	D064	L1	164.12	5.1006	-0.417651	6.59987
kc02	644	605	1	Sem	rel	v1-1	D102	L1	32.03	3.46667	-0.989041	6.40523
kc02	651	865	1	ID	rel	v1-1	D139	L1	2.03	0.708036	0.15374	6.76273
kc02	653	1376	1	ID	rel	v1-1	D111	L1	15.2	2.7213	2.39974	7.22694
kc02	655	1310	1	Morph	rel	v1-1	D011	L1	1.22	0.198851	2.10965	7.17778
kc02	663	666	1	Sem	unrel	v1-1	D095	L1	1.15	0.139762	-0.720927	6.50129
kc02	669	742	1	ID	rel	v1-1	D117	L1	2.36	0.858662	-0.386884	6.60935
kc02	671	756	1	ID	unrel	v1-1	D134	L1	12.91	2.558	-0.325349	6.62804
kc02	679	871	1	Morph	unrel	v1-1	D005	L1	2.64	0.970779	0.180111	6.76964
kc02	685	715	1	ID	rel	v1-1	D120	L1	10.14	2.31649	-0.505557	6.57228
kc02	689	673	1	Orth	unrel	v1-1	D047	L1	17.77	2.87751	-0.69016	6.51175
kc02	693	662	1	Orth	rel	v1-1	D050	L1	28.38	3.34568	-0.738508	6.49527
kc02	699	643	1	Orth	unrel	v1-1	D067	L1	18.45	2.91506	-0.822019	6.46614
kc02	701	641	1	ID	unrel	v1-1	D112	L1	19.05	2.94707	-0.83081	6.46303
kc02	707	1094	1	Sem	unrel	v1-1	D079	L1	18.65	2.92585	1.16027	6.9976
kc02	709	844	1	ID	unrel	v1-1	D113	L1	9.32	2.23216	0.0614381	6.73815
kc02	715	792	1	Sem	rel	v1-1	D104	L1	29.26	3.37622	-0.167118	6.67456
kc02	719	1206	1	ID	unrel	v1-1	D138	L1	19.59	2.97502	1.65254	7.09506
kc02	721	981	1	Sem	unrel	v1-1	D108	L1	1.76	0.565314	0.663596	6.88857
kc02	727	649	1	Morph	rel	v1-1	D020	L1	29.19	3.37383	-0.795647	6.47543
kc02	729	696	1	Morph	rel	v1-1	D018	L1	7.57	2.02419	-0.589068	6.54535
kc02	733	765	0	ID	rel	v1-1	D144	L1	0.68	-0.385662	-0.285791	6.63988
kc02	735	732	1	Sem	unrel	v1-1	D103	L1	44.19	3.7885	-0.430837	6.59578
kc02	739	833	1	Orth	unrel	v1-1	D056	L1	5.58	1.71919	0.0130897	6.72503
kc02	741	920	0	Morph	unrel	v1-1	D035	L1	8.58	2.14943	0.395482	6.82437
kc02	742	503	1	Morph	unrel	v1-1	D016	L1	178.04	5.18201	-1.43736	6.22059
kc02	746	620	1	Orth	unrel	v1-1	D072	L1	82.5	4.4128	-0.923111	6.42972
kc02	749	707	1	Sem	unrel	v1-1	D080	L1	149.26	5.00569	-0.540719	6.56103
kc02	753	808	1	Sem	rel	v1-1	D096	L1	41.15	3.71722	-0.0967931	6.69456
kc02	757	990	1	Sem	unrel	v1-1	D084	L1	19.19	2.95439	0.703153	6.8977
kc02	759	1069	1	Morph	unrel	v1-1	D033	L1	66.69	4.20006	1.05038	6.97448
kc02	767	696	1	Orth	unrel	v1-1	D054	L1	70.34	4.25334	-0.589068	6.54535
kc02	777	697	1	Morph	unrel	v1-1	D031	L1	20.61	3.02578	-0.584672	6.54679
kc02	779	784	1	Sem	unrel	v1-1	D105	L1	163.78	5.09852	-0.202281	6.66441
kc02	781	1207	0	Orth	unrel	v1-1	D063	L1	0.07	-2.65926	1.65694	7.09589
kc02	785	788	1	Orth	unrel	v1-1	D044	L1	10.1	2.31254	-0.184699	6.6695
kc02	789	946	1	Orth	unrel	v1-1	D062	L1	0.27	-1.30933	0.50976	6.85224
kc02	793	711	1	ID	rel	v1-1	D116	L1	21.62	3.07362	-0.523138	6.56667
kc02	795	694	1	Morph	rel	v1-1	D028	L1	41.82	3.73337	-0.597858	6.54247
kc02	796	613	1	Orth	unrel	v1-1	D069	L1	83.58	4.4258	-0.953878	6.41836
kc02	801	666	1	Sem	unrel	v1-1	D094	L1	12.77	2.5471	-0.720927	6.50129
kc02	803	945	1	Orth	rel	v1-1	D042	L1	0.27	-1.30933	0.505364	6.85118
kc02	805	928	1	Sem	rel	v1-1	D093	L1	11.49	2.44148	0.430644	6.83303
kc02	809	1229	1	Morph	rel	v1-1	D034	L1	18.65	2.92585	1.75363	7.11396
kc02	815	641	1	Morph	rel	v1-1	D026	L1	38.99	3.66331	-0.83081	6.46303
kc02	820	621	1	Morph	rel	v1-1	D008	L1	24.86	3.21326	-0.918716	6.43133
kc02	825	731	1	Sem	rel	v1-1	D088	L1	2.03	0.708036	-0.435232	6.59441
kc02	831	679	1	ID	unrel	v1-1	D131	L1	3.51	1.25562	-0.663788	6.52062
kc02	833	710	1	Morph	rel	v1-1	D030	L1	4.66	1.53902	-0.527533	6.56526
kc02	835	788	1	Morph	unrel	v1-1	D014	L1	19.66	2.97859	-0.184699	6.6695
kc02	841	801	1	Orth	rel	v1-1	D065	L1	0.14	-1.96611	-0.12756	6.68586
kc02	845	678	1	ID	unrel	v1-1	D141	L1	10.68	2.36837	-0.668183	6.51915
kc02	853	790	1	Morph	rel	v1-1	D017	L1	27.36	3.30908	-0.175909	6.67203
kc02	856	564	1	Morph	rel	v1-1	D002	L1	16.96	2.83086	-1.16925	6.33505
kc02	861	634	1	Orth	rel	v1-1	D040	L1	2.77	1.01885	-0.861577	6.45205
kc02	862	592	1	ID	unrel	v1-1	D125	L1	5.54	1.71199	-1.04618	6.38351
kc02	871	659	1	Morph	rel	v1-1	D007	L1	1.69	0.524729	-0.751694	6.49072
kc02	877	1151	1	Morph	unrel	v1-1	D015	L1	11.82	2.46979	1.4108	7.04839
kc02	879	862	1	Morph	unrel	v1-1	D010	L1	17.03	2.83498	0.140554	6.75926
kc02	881	685	1	Orth	unrel	v1-1	D038	L1	0.273	-1.29828	-0.637416	6.52942
kc02	887	657	1	Sem	unrel	v1-1	D086	L1	24.19	3.18594	-0.760485	6.48768
kc02	889	1136	1	ID	unrel	v1-1	D126	L1	168.78	5.1286	1.34487	7.03527
kc02	897	564	1	ID	unrel	v1-1	D143	L1	50.54	3.92277	-1.16925	6.33505
kc02	902	642	1	ID	rel	v1-1	D123	L1	16.82	2.82257	-0.826415	6.46459
kc02	905	615	1	Morph	unrel	v1-1	D004	L1	4.8	1.56862	-0.945088	6.42162
kc02	908	654	1	Orth	rel	v1-1	D055	L1	0.47	-0.755023	-0.773671	6.48311
kc02	914	1026	1	Sem	unrel	v1-1	D076	L1	18.24	2.90362	0.861384	6.93342
kc02	915	521	1	Orth	rel	v1-1	D041	L1	29.8	3.39451	-1.35825	6.25575
kc02	918	704	1	Sem	rel	v1-1	D074	L1	9.26	2.2257	-0.553905	6.55678
kc02	922	749	1	Morph	rel	v1-1	D019	L1	0.47	-0.755023	-0.356116	6.61874
kc02	925	571	1	Orth	unrel	v1-1	D043	L1	2.64	0.970779	-1.13848	6.34739
kc02	928	682	1	Orth	unrel	v1-1	D071	L1	0.68	-0.385662	-0.650602	6.52503
kc02	932	799	1	ID	rel	v1-1	D129	L1	1.55	0.438255	-0.136351	6.68336
kc02	934	662	1	Orth	unrel	v1-1	D060	L1	10.41	2.34277	-0.738508	6.49527
kc02	936	804	1	Orth	unrel	v1-1	D039	L1	12.64	2.53687	-0.114374	6.6896
kc02	940	650	1	Morph	unrel	v1-1	D009	L1	6.08	1.805	-0.791252	6.47697
kc02	942	672	1	Morph	unrel	v1-1	D036	L1	10.34	2.33602	-0.694555	6.51026
kc02	944	1127	1	Sem	rel	v1-1	D073	L1	16.76	2.819	1.30531	7.02731
kc02	947	541	1	ID	rel	v1-1	D137	L1	3.72	1.31372	-1.27034	6.29342
kc02	949	571	1	Sem	unrel	v1-1	D089	L1	60.81	4.10775	-1.13848	6.34739
kc02	952	1330	1	Sem	rel	v1-1	D077	L1	1.62	0.482426	2.19756	7.19293
kc02	956	1024	1	Morph	rel	v1-1	D023	L1	3.83	1.34286	0.852594	6.93147
kc02	958	742	1	Morph	unrel	v1-1	D029	L1	6.01	1.79342	-0.386884	6.60935
kc02	962	732	1	Sem	unrel	v1-1	D098	L1	8.72	2.16562	-0.430837	6.59578
kc02	963	611	1	Sem	rel	v1-1	D100	L1	185.61	5.22365	-0.962669	6.4151
kc02	972	654	1	Orth	unrel	v1-1	D037	L1	257.57	5.55129	-0.773671	6.48311
kc02	980	848	1	Sem	unrel	v1-1	D087	L1	4.86	1.58104	0.0790193	6.74288
kc02	981	591	1	Morph	rel	v1-1	D006	L1	40.47	3.70056	-1.05058	6.38182
kc02	986	789	1	Morph	unrel	v1-1	D032	L1	12.77	2.5471	-0.180304	6.67077
kc02	991	617	1	Morph	rel	v1-1	D025	L1	48.85	3.88875	-0.936297	6.42487
kc02	994	912	1	ID	unrel	v1-1	D110	L1	2.91	1.06815	0.360319	6.81564
kc02	996	1110	1	Sem	rel	v1-1	D107	L1	3.45	1.23837	1.23059	7.01212
kc02	1002	707	1	ID	rel	v1-1	D130	L1	2.57	0.943906	-0.540719	6.56103
kc02	1008	655	1	Orth	unrel	v1-1	D048	L1	17.77	2.87751	-0.769275	6.48464
kc02	1010	885	1	Orth	unrel	v1-1	D052	L1	0.07	-2.65926	0.241646	6.78559
kc02	1011	508	1	ID	rel	v1-1	D121	L1	9.8	2.28238	-1.41539	6.23048
kc02	1020	695	1	Orth	unrel	v1-1	D046	L1	0.61	-0.494296	-0.593463	6.54391
kc02	1025	603	1	Sem	unrel	v1-1	D090	L1	14.59	2.68034	-0.997832	6.40192
kc02	1031	616	1	Sem	rel	v1-1	D081	L1	7.3	1.98787	-0.940693	6.42325
kc02	1036	845	1	ID	rel	v1-1	D135	L1	37.3	3.61899	0.0658334	6.73934
kc02	1042	689	1	Orth	unrel	v1-1	D070	L1	8.11	2.0931	-0.619835	6.53524
kc02	1046	639	1	Sem	unrel	v1-1	D102	L1	32.03	3.46667	-0.8396	6.4599
kc02	1051	547	1	Sem	rel	v1-1	D092	L1	20.07	2.99923	-1.24397	6.30445
kc02	1056	888	1	Morph	unrel	v1-1	D011	L1	1.22	0.198851	0.254832	6.78897
kc02	1061	549	1	Morph	unrel	v1-1	D022	L1	5.61	1.72455	-1.23518	6.3081
kc02	1064	1299	1	Morph	unrel	v1-1	D001	L1	28.51	3.35025	2.0613	7.16935
kc02	1066	650	1	ID	unrel	v1-1	D133	L1	11.01	2.3988	-0.791252	6.47697
kc02	1070	800	1	ID	rel	v1-1	D142	L1	38.24	3.64388	-0.131956	6.68461
kc02	1078	866	1	Orth	unrel	v1-1	D066	L1	27.09	3.29916	0.158135	6.76388
kc02	1082	992	1	ID	unrel	v1-1	D119	L1	20	2.99573	0.711944	6.89972
kc02	1086	901	1	Sem	unrel	v1-1	D099	L1	34.66	3.54559	0.311971	6.80351
kc02	1094	712	1	Sem	unrel	v1-1	D083	L1	22.5	3.11352	-0.518743	6.56808
kc02	1102	691	1	Sem	unrel	v1-1	D091	L1	15.41	2.73502	-0.611044	6.53814
kc02	1110	702	1	Orth	rel	v1-1	D049	L1	6.35	1.84845	-0.562696	6.55393
kc02	1115	570	1	ID	unrel	v1-1	D124	L1	1.62	0.482426	-1.14288	6.34564
kc02	1118	633	1	Sem	unrel	v1-1	D106	L1	18.38	2.91126	-0.865972	6.45047
kc02	1123	558	1	ID	rel	v1-1	D127	L1	10.41	2.34277	-1.19562	6.32436
kc02	1128	723	1	Morph	unrel	v1-1	D020	L1	29.19	3.37383	-0.470394	6.58341
kc02	1130	1210	1	Sem	rel	v1-1	D101	L1	79.05	4.37008	1.67012	7.09838
kc02	1132	712	1	Morph	rel	v1-1	D012	L1	58.78	4.0738	-0.518743	6.56808
kc02	1138	1044	1	ID	unrel	v1-1	D118	L1	3.58	1.27536	0.9405	6.95081
kc02	1139	595	1	Orth	rel	v1-1	D056	L1	5.58	1.71919	-1.03299	6.38856
kc02	1142	914	1	Orth	unrel	v1-1	D058	L1	15.14	2.71734	0.36911	6.81783
kc02	1148	1054	1	Sem	unrel	v1-1	D078	L1	13.78	2.62322	0.984453	6.96035
kc02	1156	713	1	ID	unrel	v1-1	D114	L1	11.01	2.3988	-0.514348	6.56948
kc02	1157	608	1	Orth	rel	v1-1	D051	L1	0.74	-0.301105	-0.975855	6.41017
kc02	1163	532	1	Morph	unrel	v1-1	D027	L1	24.93	3.21607	-1.3099	6.27664
kc02	1172	775	0	Orth	rel	v1-1	D057	L1	1.22	0.198851	-0.241838	6.65286
kc03	25	1058	1	Morph	rel	v2-1	D020	L1	29.19	3.37383	1.08368	6.96414
kc03	29	1239	1	ID	rel	v2-1	D131	L1	3.51	1.25562	1.96451	7.12206
kc03	33	1293	1	Orth	unrel	v2-1	D044	L1	10.1	2.31254	2.2273	7.16472
kc03	39	913	1	ID	rel	v2-1	D126	L1	168.78	5.1286	0.378051	6.81674
kc03	43	1038	1	Morph	unrel	v2-1	D030	L1	4.66	1.53902	0.986356	6.94505
kc03	45	845	1	Morph	unrel	v2-1	D002	L1	16.96	2.83086	0.047133	6.73934
kc03	47	1084	1	Orth	unrel	v2-1	D071	L1	0.68	-0.385662	1.21021	6.98841
kc03	59	1108	1	Morph	rel	v2-1	D033	L1	66.69	4.20006	1.32701	7.01031
kc03	71	1285	1	Orth	rel	v2-1	D050	L1	28.38	3.34568	2.18837	7.15851
kc03	79	1160	1	Orth	unrel	v2-1	D057	L1	1.22	0.198851	1.58006	7.05618
kc03	83	1333	1	ID	rel	v2-1	D134	L1	12.91	2.558	2.42196	7.19519
kc03	89	1297	1	Sem	rel	v2-1	D085	L1	54.12	3.9912	2.24676	7.16781
kc03	95	950	1	Orth	rel	v2-1	D038	L1	0.273	-1.29828	0.558109	6.85646
kc03	101	1010	1	ID	unrel	v2-1	D109	L1	55.14	4.00988	0.850096	6.91771
kc03	109	1317	1	ID	unrel	v2-1	D130	L1	2.57	0.943906	2.34409	7.18311
kc03	115	1137	1	Morph	rel	v2-1	D026	L1	38.99	3.66331	1.46813	7.03615
kc03	119	902	1	Morph	unrel	v2-1	D009	L1	6.08	1.805	0.32452	6.80461
kc03	123	1156	1	Morph	rel	v2-1	D012	L1	58.78	4.0738	1.5606	7.05272
kc03	127	921	1	Morph	unrel	v2-1	D016	L1	178.04	5.18201	0.416982	6.82546
kc03	129	880	1	Sem	unrel	v2-1	D107	L1	3.45	1.23837	0.217458	6.77992
kc03	131	871	1	Morph	rel	v2-1	D007	L1	1.69	0.524729	0.17366	6.76964
kc03	135	1332	0	Orth	rel	v2-1	D063	L1	0.07	-2.65926	2.41709	7.19444
kc03	137	907	1	Sem	unrel	v2-1	D089	L1	60.81	4.10775	0.348852	6.81014
kc03	139	954	1	Sem	rel	v2-1	D088	L1	2.03	0.708036	0.577575	6.86066
kc03	143	791	1	Sem	unrel	v2-1	D105	L1	163.78	5.09852	-0.215655	6.6733
kc03	145	998	1	Orth	unrel	v2-1	D049	L1	6.35	1.84845	0.791698	6.90575
kc03	149	923	1	Sem	rel	v2-1	D097	L1	43.85	3.78077	0.426715	6.82763
kc03	155	736	1	Morph	rel	v2-1	D024	L1	13.45	2.59898	-0.483309	6.60123
kc03	163	802	1	Orth	unrel	v2-1	D048	L1	17.77	2.87751	-0.162124	6.68711
kc03	169	975	1	Sem	rel	v2-1	D082	L1	8.18	2.10169	0.67977	6.88244
kc03	173	1060	1	Morph	rel	v2-1	D035	L1	8.58	2.14943	1.09342	6.96602
kc03	175	931	1	ID	rel	v2-1	D140	L1	16.69	2.81481	0.465647	6.83626
kc03	177	914	1	Sem	unrel	v2-1	D075	L1	11.89	2.4757	0.382917	6.81783
kc03	185	765	1	Sem	unrel	v2-1	D076	L1	18.24	2.90362	-0.342182	6.63988
kc03	189	1258	1	ID	rel	v2-1	D137	L1	3.72	1.31372	2.05697	7.13728
kc03	191	705	1	Sem	rel	v2-1	D103	L1	44.19	3.7885	-0.634169	6.5582
kc03	193	872	1	Sem	rel	v2-1	D102	L1	32.03	3.46667	0.178527	6.77079
kc03	199	796	1	Orth	rel	v2-1	D070	L1	8.11	2.0931	-0.191323	6.6796
kc03	207	727	1	ID	unrel	v2-1	D118	L1	3.58	1.27536	-0.527107	6.58893
kc03	215	778	1	ID	rel	v2-1	D139	L1	2.03	0.708036	-0.278918	6.65673
kc03	217	688	1	Sem	rel	v2-1	D099	L1	34.66	3.54559	-0.716898	6.53379
kc03	221	734	1	ID	rel	v2-1	D113	L1	9.32	2.23216	-0.493042	6.59851
kc03	223	789	1	Sem	rel	v2-1	D096	L1	41.15	3.71722	-0.225388	6.67077
kc03	225	747	1	Sem	rel	v2-1	D078	L1	13.78	2.62322	-0.429778	6.61607
kc03	231	928	1	Morph	rel	v2-1	D001	L1	28.51	3.35025	0.451048	6.83303
kc03	239	803	1	Orth	unrel	v2-1	D056	L1	5.58	1.71919	-0.157257	6.68835
kc03	243	936	1	ID	unrel	v2-1	D142	L1	38.24	3.64388	0.489979	6.84162
kc03	247	693	1	Sem	rel	v2-1	D101	L1	79.05	4.37008	-0.692566	6.54103
kc03	249	764	1	Morph	rel	v2-1	D036	L1	10.34	2.33602	-0.347049	6.63857
kc03	255	736	1	Orth	rel	v2-1	D072	L1	82.5	4.4128	-0.483309	6.60123
kc03	261	669	1	Orth	unrel	v2-1	D041	L1	29.8	3.39451	-0.80936	6.50578
kc03	263	683	1	Orth	unrel	v2-1	D045	L1	30.88	3.43011	-0.74123	6.52649
kc03	267	1185	1	Morph	rel	v2-1	D011	L1	1.22	0.198851	1.70172	7.0775
kc03	269	680	1	ID	unrel	v2-1	D144	L1	0.68	-0.385662	-0.75583	6.52209
kc03	271	742	1	Morph	unrel	v2-1	D029	L1	6.01	1.79342	-0.45411	6.60935
kc03	275	908	1	ID	rel	v2-1	D127	L1	10.41	2.34277	0.353719	6.81124
kc03	283	975	1	Orth	unrel	v2-1	D042	L1	0.27	-1.30933	0.67977	6.88244
kc03	289	1131	1	Sem	rel	v2-1	D108	L1	1.76	0.565314	1.43893	7.03086
kc03	297	862	1	Orth	rel	v2-1	D040	L1	2.77	1.01885	0.129862	6.75926
kc03	299	1045	1	Morph	unrel	v2-1	D018	L1	7.57	2.02419	1.02042	6.95177
kc03	301	835	1	Orth	rel	v2-1	D046	L1	0.61	-0.494296	-0.0015314	6.72743
kc03	307	808	1	Morph	rel	v2-1	D019	L1	0.47	-0.755023	-0.132925	6.69456
kc03	311	1181	1	Orth	rel	v2-1	D061	L1	17.03	2.83498	1.68226	7.07412
kc03	314	673	1	Morph	unrel	v2-1	D028	L1	41.82	3.73337	-0.789895	6.51175
kc03	316	648	1	Sem	unrel	v2-1	D106	L1	18.38	2.91126	-0.911556	6.47389
kc03	321	564	1	Orth	unrel	v2-1	D037	L1	257.57	5.55129	-1.32034	6.33505
kc03	324	1059	1	Morph	unrel	v2-1	D015	L1	11.82	2.46979	1.08855	6.96508
kc03	326	1145	1	Sem	unrel	v2-1	D095	L1	1.15	0.139762	1.50707	7.04316
kc03	332	726	1	Morph	rel	v2-1	D021	L1	3.11	1.13462	-0.531973	6.58755
kc03	338	834	1	Sem	rel	v2-1	D086	L1	24.19	3.18594	-0.00639784	6.72623
kc03	340	784	1	Morph	unrel	v2-1	D027	L1	24.93	3.21607	-0.24972	6.66441
kc03	344	822	1	Orth	rel	v2-1	D047	L1	17.77	2.87751	-0.0647951	6.71174
kc03	346	813	1	Orth	unrel	v2-1	D052	L1	0.07	-2.65926	-0.108593	6.70073
kc03	348	852	1	ID	unrel	v2-1	D122	L1	60.27	4.09883	0.0811981	6.74759
kc03	354	840	1	Sem	rel	v2-1	D084	L1	19.19	2.95439	0.0228008	6.7334
kc03	362	803	1	Sem	rel	v2-1	D080	L1	149.26	5.00569	-0.157257	6.68835
kc03	370	990	1	Sem	rel	v2-1	D100	L1	185.61	5.22365	0.752767	6.8977
kc03	374	1099	1	Sem	unrel	v2-1	D093	L1	11.49	2.44148	1.28321	7.00216
kc03	380	655	1	Sem	unrel	v2-1	D092	L1	20.07	2.99923	-0.877491	6.48464
kc03	382	694	1	Orth	unrel	v2-1	D054	L1	70.34	4.25334	-0.687699	6.54247
kc03	384	813	1	ID	rel	v2-1	D143	L1	50.54	3.92277	-0.108593	6.70073
kc03	390	1065	1	ID	unrel	v2-1	D125	L1	5.54	1.71199	1.11775	6.97073
kc03	396	789	1	ID	rel	v2-1	D141	L1	10.68	2.36837	-0.225388	6.67077
kc03	398	860	1	Orth	rel	v2-1	D043	L1	2.64	0.970779	0.12013	6.75693
kc03	402	970	1	Morph	unrel	v2-1	D014	L1	19.66	2.97859	0.655438	6.8773
kc03	410	740	1	Morph	rel	v2-1	D008	L1	24.86	3.21326	-0.463843	6.60665
kc03	412	819	1	ID	unrel	v2-1	D124	L1	1.62	0.482426	-0.0793944	6.70808
kc03	414	994	1	Morph	rel	v2-1	D010	L1	17.03	2.83498	0.772233	6.90174
kc03	418	935	1	ID	unrel	v2-1	D110	L1	2.91	1.06815	0.485113	6.84055
kc03	420	830	1	Orth	rel	v2-1	D068	L1	7.97	2.07568	-0.0258636	6.72143
kc03	422	709	1	Orth	unrel	v2-1	D058	L1	15.14	2.71734	-0.614703	6.56386
kc03	426	858	1	Morph	rel	v2-1	D023	L1	3.83	1.34286	0.110397	6.7546
kc03	428	713	1	Morph	rel	v2-1	D025	L1	48.85	3.88875	-0.595237	6.56948
kc03	434	1245	1	ID	unrel	v2-1	D114	L1	11.01	2.3988	1.99371	7.12689
kc03	436	732	1	ID	rel	v2-1	D133	L1	11.01	2.3988	-0.502775	6.59578
kc03	440	921	1	Orth	rel	v2-1	D062	L1	0.27	-1.30933	0.416982	6.82546
kc03	442	800	1	Orth	unrel	v2-1	D051	L1	0.74	-0.301105	-0.171857	6.68461
kc03	444	647	1	ID	unrel	v2-1	D112	L1	19.05	2.94707	-0.916422	6.47235
kc03	448	668	1	Morph	rel	v2-1	D031	L1	20.61	3.02578	-0.814227	6.50429
kc03	452	1210	0	Orth	rel	v2-1	D065	L1	0.14	-1.96611	1.82338	7.09838
kc03	456	768	1	Morph	rel	v2-1	D022	L1	5.61	1.72455	-0.327583	6.64379
kc03	458	1162	1	Morph	rel	v2-1	D034	L1	18.65	2.92585	1.58979	7.0579
kc03	460	1157	1	Sem	rel	v2-1	D087	L1	4.86	1.58104	1.56546	7.05359
kc03	464	821	1	ID	unrel	v2-1	D117	L1	2.36	0.858662	-0.0696616	6.71052
kc03	466	932	1	Morph	unrel	v2-1	D013	L1	2.03	0.708036	0.470513	6.83733
kc03	468	738	1	ID	unrel	v2-1	D128	L1	153.99	5.03689	-0.473576	6.60394
kc03	472	840	1	Sem	rel	v2-1	D073	L1	16.76	2.819	0.0228008	6.7334
kc03	478	732	1	Orth	unrel	v2-1	D064	L1	164.12	5.1006	-0.502775	6.59578
kc03	480	667	1	ID	unrel	v2-1	D121	L1	9.8	2.28238	-0.819093	6.50279
kc03	482	818	1	Morph	unrel	v2-1	D017	L1	27.36	3.30908	-0.0842609	6.70686
kc03	485	623	1	Sem	unrel	v2-1	D098	L1	8.72	2.16562	-1.03322	6.43455
kc03	490	708	1	Sem	rel	v2-1	D091	L1	15.41	2.73502	-0.619569	6.56244
kc03	492	715	1	Sem	unrel	v2-1	D085	L1	54.12	3.9912	-0.585504	6.57228
kc03	494	986	1	Sem	rel	v2-1	D081	L1	7.3	1.98787	0.733301	6.89366
kc03	498	864	1	Orth	unrel	v2-1	D038	L1	0.273	-1.29828	0.139595	6.76157
kc03	502	709	1	ID	rel	v2-1	D109	L1	55.14	4.00988	-0.614703	6.56386
kc03	504	636	1	ID	rel	v2-1	D119	L1	20	2.99573	-0.969953	6.4552
kc03	510	712	1	ID	rel	v2-1	D129	L1	1.55	0.438255	-0.600104	6.56808
kc03	512	1262	1	Morph	unrel	v2-1	D005	L1	2.64	0.970779	2.07644	7.14045
kc03	516	780	1	Orth	unrel	v2-1	D069	L1	83.58	4.4258	-0.269186	6.65929
kc03	524	799	1	ID	unrel	v2-1	D115	L1	13.18	2.5787	-0.176723	6.68336
kc03	526	886	1	Orth	rel	v2-1	D039	L1	12.64	2.53687	0.246657	6.78672
kc03	528	724	1	Morph	rel	v2-1	D016	L1	178.04	5.18201	-0.541706	6.58479
kc03	532	1010	1	Sem	rel	v2-1	D107	L1	3.45	1.23837	0.850096	6.91771
kc03	535	543	1	Morph	rel	v2-1	D006	L1	40.47	3.70056	-1.42253	6.29711
kc03	537	590	1	Sem	rel	v2-1	D089	L1	60.81	4.10775	-1.19381	6.38012
kc03	542	1340	1	ID	rel	v2-1	D136	L1	0.2	-1.60944	2.45602	7.20042
kc03	546	1041	1	Morph	unrel	v2-1	D012	L1	58.78	4.0738	1.00096	6.94794
kc03	548	648	1	Orth	unrel	v2-1	D053	L1	31.96	3.46449	-0.911556	6.47389
kc03	554	676	1	ID	unrel	v2-1	D111	L1	15.2	2.7213	-0.775295	6.51619
kc03	556	803	1	Morph	unrel	v2-1	D024	L1	13.45	2.59898	-0.157257	6.68835
kc03	564	630	1	Orth	rel	v2-1	D048	L1	17.77	2.87751	-0.999152	6.44572
kc03	570	794	1	Sem	unrel	v2-1	D082	L1	8.18	2.10169	-0.201055	6.67708
kc03	574	807	1	Morph	unrel	v2-1	D035	L1	8.58	2.14943	-0.137792	6.69332
kc03	576	902	1	ID	unrel	v2-1	D140	L1	16.69	2.81481	0.32452	6.80461
kc03	578	901	1	Sem	rel	v2-1	D075	L1	11.89	2.4757	0.319654	6.80351
kc03	586	800	1	Sem	rel	v2-1	D076	L1	18.24	2.90362	-0.171857	6.68461
kc03	588	814	1	ID	rel	v2-1	D138	L1	19.59	2.97502	-0.103727	6.70196
kc03	590	677	1	ID	unrel	v2-1	D137	L1	3.72	1.31372	-0.770429	6.51767
kc03	594	827	1	Sem	unrel	v2-1	D102	L1	32.03	3.46667	-0.0404629	6.7178
kc03	603	697	1	Sem	unrel	v2-1	D103	L1	44.19	3.7885	-0.6731	6.54679
kc03	605	632	1	ID	unrel	v2-1	D132	L1	41.49	3.72545	-0.989419	6.44889
kc03	607	734	1	ID	rel	v2-1	D135	L1	37.3	3.61899	-0.493042	6.59851
kc03	611	852	1	Orth	unrel	v2-1	D060	L1	10.41	2.34277	0.0811981	6.74759
kc03	617	752	1	Sem	rel	v2-1	D090	L1	14.59	2.68034	-0.405446	6.62274
kc03	619	887	1	Sem	unrel	v2-1	D099	L1	34.66	3.54559	0.251524	6.78784
kc03	621	789	1	ID	unrel	v2-1	D139	L1	2.03	0.708036	-0.225388	6.67077
kc03	625	1131	1	Sem	unrel	v2-1	D096	L1	41.15	3.71722	1.43893	7.03086
kc03	627	666	1	Sem	unrel	v2-1	D078	L1	13.78	2.62322	-0.82396	6.50129
kc03	629	656	1	ID	unrel	v2-1	D113	L1	9.32	2.23216	-0.872624	6.48616
kc03	633	654	1	Morph	unrel	v2-1	D001	L1	28.51	3.35025	-0.882357	6.48311
kc03	641	961	1	Sem	rel	v2-1	D083	L1	22.5	3.11352	0.61164	6.86797
kc03	643	656	1	Morph	unrel	v2-1	D007	L1	1.69	0.524729	-0.872624	6.48616
kc03	649	628	1	Sem	unrel	v2-1	D101	L1	79.05	4.37008	-1.00888	6.44254
kc03	651	690	1	Morph	unrel	v2-1	D036	L1	10.34	2.33602	-0.707165	6.53669
kc03	653	1169	1	Sem	unrel	v2-1	D077	L1	1.62	0.482426	1.62386	7.0639
kc03	657	711	1	Orth	unrel	v2-1	D072	L1	82.5	4.4128	-0.60497	6.56667
kc03	663	971	1	Morph	rel	v2-1	D003	L1	1.15	0.139762	0.660304	6.87833
kc03	669	871	1	Morph	unrel	v2-1	D011	L1	1.22	0.198851	0.17366	6.76964
kc03	671	814	1	Orth	rel	v2-1	D056	L1	5.58	1.71919	-0.103727	6.70196
kc03	672	620	1	Morph	rel	v2-1	D029	L1	6.01	1.79342	-1.04782	6.42972
kc03	681	648	1	Sem	rel	v2-1	D079	L1	18.65	2.92585	-0.911556	6.47389
kc03	685	709	1	ID	unrel	v2-1	D120	L1	10.14	2.31649	-0.614703	6.56386
kc03	691	801	1	Sem	unrel	v2-1	D108	L1	1.76	0.565314	-0.16699	6.68586
kc03	699	748	1	ID	unrel	v2-1	D123	L1	16.82	2.82257	-0.424912	6.6174
kc03	703	858	1	Morph	rel	v2-1	D018	L1	7.57	2.02419	0.110397	6.7546
kc03	705	936	1	Orth	unrel	v2-1	D046	L1	0.61	-0.494296	0.489979	6.84162
kc03	709	1134	1	Morph	unrel	v2-1	D019	L1	0.47	-0.755023	1.45353	7.03351
kc03	713	851	1	ID	rel	v2-1	D118	L1	3.58	1.27536	0.0763316	6.74641
kc03	715	730	1	Sem	rel	v2-1	D094	L1	12.77	2.5471	-0.512508	6.59304
kc03	717	913	1	Sem	rel	v2-1	D106	L1	18.38	2.91126	0.378051	6.81674
kc03	725	1300	1	Morph	rel	v2-1	D015	L1	11.82	2.46979	2.26136	7.17012
kc03	727	746	1	Orth	unrel	v2-1	D067	L1	18.45	2.91506	-0.434645	6.61473
kc03	731	752	1	ID	unrel	v2-1	D116	L1	21.62	3.07362	-0.405446	6.62274
kc03	733	711	1	Morph	unrel	v2-1	D021	L1	3.11	1.13462	-0.60497	6.56667
kc03	739	675	1	Sem	unrel	v2-1	D086	L1	24.19	3.18594	-0.780162	6.51471
kc03	740	618	1	Morph	rel	v2-1	D027	L1	24.93	3.21607	-1.05755	6.42649
kc03	743	760	1	Orth	unrel	v2-1	D066	L1	27.09	3.29916	-0.366514	6.63332
kc03	747	862	1	Orth	unrel	v2-1	D047	L1	17.77	2.87751	0.129862	6.75926
kc03	749	1012	1	Orth	rel	v2-1	D052	L1	0.07	-2.65926	0.859829	6.91968
kc03	751	771	1	ID	rel	v2-1	D122	L1	60.27	4.09883	-0.312984	6.64769
kc03	755	817	1	Morph	rel	v2-1	D004	L1	4.8	1.56862	-0.0891273	6.70564
kc03	757	639	1	Sem	unrel	v2-1	D084	L1	19.19	2.95439	-0.955354	6.4599
kc03	762	588	1	Sem	unrel	v2-1	D080	L1	149.26	5.00569	-1.20354	6.37673
kc03	767	921	1	Morph	rel	v2-1	D028	L1	41.82	3.73337	0.416982	6.82546
kc03	768	616	1	Orth	rel	v2-1	D044	L1	10.1	2.31254	-1.06728	6.42325
kc03	771	639	1	ID	unrel	v2-1	D134	L1	12.91	2.558	-0.955354	6.4599
kc03	779	634	1	Orth	rel	v2-1	D041	L1	29.8	3.39451	-0.979686	6.45205
kc03	785	926	1	ID	unrel	v2-1	D143	L1	50.54	3.92277	0.441315	6.83087
kc03	787	652	1	ID	unrel	v2-1	D126	L1	168.78	5.1286	-0.89209	6.48004
kc03	794	615	1	Morph	rel	v2-1	D032	L1	12.77	2.5471	-1.07215	6.42162
kc03	796	542	1	Sem	unrel	v2-1	D088	L1	2.03	0.708036	-1.4274	6.29527
kc03	799	757	1	Orth	unrel	v2-1	D043	L1	2.64	0.970779	-0.381114	6.62936
kc03	802	618	1	Morph	unrel	v2-1	D033	L1	66.69	4.20006	-1.05755	6.42649
kc03	811	685	1	Orth	rel	v2-1	D059	L1	24.3	3.19048	-0.731497	6.52942
kc03	813	708	1	ID	rel	v2-1	D124	L1	1.62	0.482426	-0.619569	6.56244
kc03	815	771	1	Morph	unrel	v2-1	D010	L1	17.03	2.83498	-0.312984	6.64769
kc03	823	902	1	Sem	rel	v2-1	D105	L1	163.78	5.09852	0.32452	6.80461
kc03	828	610	1	Morph	unrel	v2-1	D025	L1	48.85	3.88875	-1.09648	6.41346
kc03	837	805	1	ID	unrel	v2-1	D133	L1	11.01	2.3988	-0.147525	6.69084
kc03	842	553	1	Sem	unrel	v2-1	D104	L1	29.26	3.37622	-1.37387	6.31536
kc03	845	944	1	ID	rel	v2-1	D112	L1	19.05	2.94707	0.528911	6.85013
kc03	849	1197	1	Morph	unrel	v2-1	D031	L1	20.61	3.02578	1.76012	7.08757
kc03	852	595	1	Orth	rel	v2-1	D045	L1	30.88	3.43011	-1.16948	6.38856
kc03	856	600	1	Morph	unrel	v2-1	D022	L1	5.61	1.72455	-1.14514	6.39693
kc03	861	654	1	Orth	unrel	v2-1	D061	L1	17.03	2.83498	-0.882357	6.48311
kc03	866	610	1	Morph	rel	v2-1	D013	L1	2.03	0.708036	-1.09648	6.41346
kc03	873	630	1	Morph	unrel	v2-1	D026	L1	38.99	3.66331	-0.999152	6.44572
kc03	877	708	1	ID	rel	v2-1	D144	L1	0.68	-0.385662	-0.619569	6.56244
kc03	881	633	1	Sem	unrel	v2-1	D100	L1	185.61	5.22365	-0.984552	6.45047
kc03	883	640	1	Morph	rel	v2-1	D017	L1	27.36	3.30908	-0.950487	6.46147
kc03	887	637	1	Sem	rel	v2-1	D098	L1	8.72	2.16562	-0.965087	6.45677
kc03	896	699	1	Sem	unrel	v2-1	D081	L1	7.3	1.98787	-0.663367	6.54965
kc03	900	731	1	Orth	rel	v2-1	D071	L1	0.68	-0.385662	-0.507641	6.59441
kc03	901	618	1	Orth	rel	v2-1	D057	L1	1.22	0.198851	-1.05755	6.42649
kc03	910	677	1	Orth	rel	v2-1	D049	L1	6.35	1.84845	-0.770429	6.51767
kc03	914	706	0	Morph	rel	v2-1	D005	L1	2.64	0.970779	-0.629302	6.55962
kc03	916	777	1	ID	unrel	v2-1	D129	L1	1.55	0.438255	-0.283785	6.65544
kc03	918	768	1	Orth	rel	v2-1	D069	L1	83.58	4.4258	-0.327583	6.64379
kc03	926	682	1	Morph	rel	v2-1	D014	L1	19.66	2.97859	-0.746097	6.52503
kc03	928	665	1	ID	rel	v2-1	D115	L1	13.18	2.5787	-0.828826	6.49979
kc03	929	608	1	Morph	rel	v2-1	D030	L1	4.66	1.53902	-1.10621	6.41017
kc03	934	998	1	Morph	unrel	v2-1	D023	L1	3.83	1.34286	0.791698	6.90575
kc03	938	763	1	Morph	unrel	v2-1	D006	L1	40.47	3.70056	-0.351915	6.63726
kc03	944	1111	1	ID	unrel	v2-1	D136	L1	0.2	-1.60944	1.34161	7.01302
kc03	948	669	1	Morph	rel	v2-1	D009	L1	6.08	1.805	-0.80936	6.50578
kc03	950	707	1	Orth	rel	v2-1	D053	L1	31.96	3.46449	-0.624436	6.56103
kc03	956	824	1	ID	rel	v2-1	D111	L1	15.2	2.7213	-0.0550622	6.71417
kc03	964	810	1	Sem	rel	v2-1	D093	L1	11.49	2.44148	-0.123192	6.69703
kc03	972	814	1	Sem	unrel	v2-1	D097	L1	43.85	3.78077	-0.103727	6.70196
kc03	974	836	1	Morph	unrel	v2-1	D020	L1	29.19	3.37383	0.00333504	6.72863
kc03	982	759	1	ID	rel	v2-1	D125	L1	5.54	1.71199	-0.371381	6.632
kc03	986	669	1	Orth	rel	v2-1	D037	L1	257.57	5.55129	-0.80936	6.50578
kc03	992	713	1	Orth	rel	v2-1	D051	L1	0.74	-0.301105	-0.595237	6.56948
kc03	995	566	1	Orth	rel	v2-1	D042	L1	0.27	-1.30933	-1.3106	6.33859
kc03	999	620	1	Orth	unrel	v2-1	D068	L1	7.97	2.07568	-1.04782	6.42972
kc03	1008	1151	1	ID	rel	v2-1	D132	L1	41.49	3.72545	1.53626	7.04839
kc03	1010	654	1	ID	unrel	v2-1	D135	L1	37.3	3.61899	-0.882357	6.48311
kc03	1014	899	1	ID	rel	v2-1	D130	L1	2.57	0.943906	0.309921	6.80128
kc03	1020	655	1	Sem	rel	v2-1	D092	L1	20.07	2.99923	-0.877491	6.48464
kc03	1028	698	1	ID	unrel	v2-1	D127	L1	10.41	2.34277	-0.668234	6.54822
kc03	1030	641	1	Morph	unrel	v2-1	D008	L1	24.86	3.21326	-0.945621	6.46303
kc03	1032	656	1	ID	unrel	v2-1	D131	L1	3.51	1.25562	-0.872624	6.48616
kc03	1036	941	1	ID	rel	v2-1	D110	L1	2.91	1.06815	0.514311	6.84694
kc03	1042	633	1	Sem	unrel	v2-1	D083	L1	22.5	3.11352	-0.984552	6.45047
kc03	1046	863	1	Sem	rel	v2-1	D095	L1	1.15	0.139762	0.134729	6.76041
kc03	1052	915	0	Orth	unrel	v2-1	D063	L1	0.07	-2.65926	0.387784	6.81892
kc03	1058	639	1	Orth	unrel	v2-1	D040	L1	2.77	1.01885	-0.955354	6.4599
kc03	1064	1307	1	Morph	rel	v2-1	D002	L1	16.96	2.83086	2.29543	7.17549
kc03	1065	610	1	Sem	unrel	v2-1	D074	L1	9.26	2.2257	-1.09648	6.41346
kc03	1069	600	1	ID	unrel	v2-1	D138	L1	19.59	2.97502	-1.14514	6.39693
kc03	1071	590	1	Orth	unrel	v2-1	D050	L1	28.38	3.34568	-1.19381	6.38012
kc03	1080	785	1	ID	rel	v2-1	D142	L1	38.24	3.64388	-0.244853	6.66568
kc03	1081	608	1	Sem	unrel	v2-1	D079	L1	18.65	2.92585	-1.10621	6.41017
kc03	1086	693	1	ID	rel	v2-1	D120	L1	10.14	2.31649	-0.692566	6.54103
kc03	1094	768	1	Morph	unrel	v2-1	D003	L1	1.15	0.139762	-0.327583	6.64379
kc03	1096	783	1	Orth	rel	v2-1	D058	L1	15.14	2.71734	-0.254586	6.66313
kc03	1098	806	1	Orth	unrel	v2-1	D070	L1	8.11	2.0931	-0.142658	6.69208
kc03	1102	795	1	ID	unrel	v2-1	D141	L1	10.68	2.36837	-0.196189	6.67834
kc03	1106	921	1	Orth	unrel	v2-1	D055	L1	0.47	-0.755023	0.416982	6.82546
kc03	1108	1304	1	ID	rel	v2-1	D114	L1	11.01	2.3988	2.28083	7.17319
kc03	1114	1300	1	Orth	unrel	v2-1	D062	L1	0.27	-1.30933	2.26136	7.17012
kc03	1116	771	1	Sem	unrel	v2-1	D094	L1	12.77	2.5471	-0.312984	6.64769
kc03	1122	1223	1	Sem	unrel	v2-1	D090	L1	14.59	2.68034	1.88665	7.10906
kc03	1128	747	1	ID	rel	v2-1	D117	L1	2.36	0.858662	-0.429778	6.61607
kc03	1130	762	1	Orth	rel	v2-1	D067	L1	18.45	2.91506	-0.356782	6.63595
kc03	1131	536	1	ID	rel	v2-1	D116	L1	21.62	3.07362	-1.4566	6.28413
kc03	1136	694	1	Orth	unrel	v2-1	D065	L1	0.14	-1.96611	-0.687699	6.54247
kc03	1137	620	1	ID	rel	v2-1	D123	L1	16.82	2.82257	-1.04782	6.42972
kc03	1140	915	1	Morph	unrel	v2-1	D034	L1	18.65	2.92585	0.387784	6.81892
kc03	1144	817	1	Orth	rel	v2-1	D066	L1	27.09	3.29916	-0.0891273	6.70564
kc03	1146	1336	1	Sem	unrel	v2-1	D087	L1	4.86	1.58104	2.43656	7.19744
kc03	1147	558	1	Sem	rel	v2-1	D077	L1	1.62	0.482426	-1.34954	6.32436
kc03	1152	636	1	ID	rel	v2-1	D128	L1	153.99	5.03689	-0.969953	6.4552
kc03	1155	585	1	Sem	unrel	v2-1	D073	L1	16.76	2.819	-1.21814	6.37161
kc03	1158	640	1	Orth	unrel	v2-1	D039	L1	12.64	2.53687	-0.950487	6.46147
kc03	1160	791	1	Orth	rel	v2-1	D060	L1	10.41	2.34277	-0.215655	6.6733
kc03	1163	564	1	Orth	rel	v2-1	D064	L1	164.12	5.1006	-1.32034	6.33505
kc03	1165	531	1	ID	rel	v2-1	D121	L1	9.8	2.28238	-1.48093	6.27476
kc03	1170	840	1	Sem	unrel	v2-1	D091	L1	15.41	2.73502	0.0228008	6.7334
kc03	1172	663	1	ID	unrel	v2-1	D119	L1	20	2.99573	-0.838559	6.49677
kc04	25	760	1	Morph	unrel	v1-2	D020	L1	29.19	3.37383	-0.346924	6.63332
kc04	33	1139	1	ID	unrel	v1-2	D113	L1	9.32	2.23216	1.57187	7.03791
kc04	35	898	1	Sem	rel	v1-2	D074	L1	9.26	2.2257	0.351739	6.80017
kc04	39	872	1	Orth	rel	v1-2	D042	L1	0.27	-1.30933	0.220107	6.77079
kc04	41	774	1	Sem	unrel	v1-2	D097	L1	43.85	3.78077	-0.276045	6.65157
kc04	45	1180	1	Orth	rel	v1-2	D052	L1	0.07	-2.65926	1.77944	7.07327
kc04	47	819	1	ID	unrel	v1-2	D125	L1	5.54	1.71199	-0.0482203	6.70808
kc04	53	839	1	Morph	unrel	v1-2	D006	L1	40.47	3.70056	0.0530353	6.73221
kc04	61	682	1	Orth	rel	v1-2	D066	L1	27.09	3.29916	-0.741821	6.52503
kc04	69	957	0	Orth	rel	v1-2	D051	L1	0.74	-0.301105	0.650443	6.8638
kc04	71	868	1	Orth	unrel	v1-2	D046	L1	0.61	-0.494296	0.199856	6.76619
kc04	73	810	1	Orth	rel	v1-2	D043	L1	2.64	0.970779	-0.0937853	6.69703
kc04	77	736	1	Orth	unrel	v1-2	D053	L1	31.96	3.46449	-0.468431	6.60123
kc04	79	654	1	Sem	unrel	v1-2	D092	L1	20.07	2.99923	-0.883579	6.48311
kc04	85	1139	0	ID	unrel	v1-2	D137	L1	3.72	1.31372	1.57187	7.03791
kc04	87	897	1	Morph	rel	v1-2	D001	L1	28.51	3.35025	0.346676	6.79906
kc04	89	824	1	Morph	rel	v1-2	D010	L1	17.03	2.83498	-0.0229064	6.71417
kc04	93	758	1	Morph	rel	v1-2	D034	L1	18.65	2.92585	-0.35705	6.63068
kc04	99	762	0	ID	rel	v1-2	D130	L1	2.57	0.943906	-0.336799	6.63595
kc04	103	695	1	Orth	rel	v1-2	D054	L1	70.34	4.25334	-0.676005	6.54391
kc04	107	653	1	Sem	rel	v1-2	D091	L1	15.41	2.73502	-0.888642	6.48158
kc04	109	876	1	Morph	unrel	v1-2	D025	L1	48.85	3.88875	0.240358	6.77537
kc04	111	858	1	Morph	rel	v1-2	D036	L1	10.34	2.33602	0.149228	6.7546
kc04	115	944	1	Orth	unrel	v1-2	D058	L1	15.14	2.71734	0.584627	6.85013
kc04	119	765	1	Orth	unrel	v1-2	D041	L1	29.8	3.39451	-0.32161	6.63988
kc04	125	961	1	Morph	rel	v1-2	D021	L1	3.11	1.13462	0.670694	6.86797
kc04	133	1028	0	Sem	rel	v1-2	D095	L1	1.15	0.139762	1.0099	6.93537
kc04	139	713	1	Morph	rel	v1-2	D009	L1	6.08	1.805	-0.584875	6.56948
kc04	143	806	1	Sem	unrel	v1-2	D088	L1	2.03	0.708036	-0.114036	6.69208
kc04	149	898	1	Morph	unrel	v1-2	D004	L1	4.8	1.56862	0.351739	6.80017
kc04	153	896	1	Morph	rel	v1-2	D013	L1	2.03	0.708036	0.341614	6.79794
kc04	157	773	1	ID	unrel	v1-2	D142	L1	38.24	3.64388	-0.281108	6.65028
kc04	159	804	1	ID	unrel	v1-2	D116	L1	21.62	3.07362	-0.124162	6.6896
kc04	163	721	1	Orth	rel	v1-2	D055	L1	0.47	-0.755023	-0.544373	6.58064
kc04	165	768	1	ID	unrel	v1-2	D141	L1	10.68	2.36837	-0.306422	6.64379
kc04	169	806	1	Sem	rel	v1-2	D098	L1	8.72	2.16562	-0.114036	6.69208
kc04	173	651	1	Morph	rel	v1-2	D027	L1	24.93	3.21607	-0.898767	6.47851
kc04	175	666	1	Orth	rel	v1-2	D050	L1	28.38	3.34568	-0.822826	6.50129
kc04	177	736	1	Sem	unrel	v1-2	D100	L1	185.61	5.22365	-0.468431	6.60123
kc04	181	838	1	ID	unrel	v1-2	D144	L1	0.68	-0.385662	0.0479725	6.73102
kc04	183	1253	1	Morph	rel	v1-2	D012	L1	58.78	4.0738	2.14903	7.1333
kc04	185	788	1	Sem	rel	v1-2	D078	L1	13.78	2.62322	-0.205166	6.6695
kc04	189	1313	0	Morph	rel	v1-2	D007	L1	1.69	0.524729	2.45279	7.18007
kc04	195	629	1	ID	unrel	v1-2	D132	L1	41.49	3.72545	-1.01015	6.44413
kc04	197	628	1	Sem	rel	v1-2	D107	L1	3.45	1.23837	-1.01521	6.44254
kc04	201	969	1	Sem	rel	v1-2	D084	L1	19.19	2.95439	0.711197	6.87626
kc04	205	951	1	Orth	unrel	v1-2	D049	L1	6.35	1.84845	0.620067	6.85751
kc04	211	827	1	Sem	rel	v1-2	D075	L1	11.89	2.4757	-0.00771808	6.7178
kc04	219	702	1	Sem	unrel	v1-2	D106	L1	18.38	2.91126	-0.640565	6.55393
kc04	223	1012	1	Orth	unrel	v1-2	D067	L1	18.45	2.91506	0.928896	6.91968
kc04	225	1178	1	Orth	unrel	v1-2	D056	L1	5.58	1.71919	1.76932	7.07157
kc04	227	1033	1	Morph	unrel	v1-2	D031	L1	20.61	3.02578	1.03521	6.94022
kc04	231	878	1	ID	unrel	v1-2	D121	L1	9.8	2.28238	0.250484	6.77765
kc04	235	788	1	Morph	rel	v1-2	D033	L1	66.69	4.20006	-0.205166	6.6695
kc04	241	1184	1	Morph	rel	v1-2	D008	L1	24.86	3.21326	1.79969	7.07665
kc04	243	887	1	Orth	rel	v1-2	D064	L1	164.12	5.1006	0.296049	6.78784
kc04	251	994	1	ID	rel	v1-2	D119	L1	20	2.99573	0.837766	6.90174
kc04	253	921	1	Sem	rel	v1-2	D093	L1	11.49	2.44148	0.468183	6.82546
kc04	259	1077	1	Orth	rel	v1-2	D039	L1	12.64	2.53687	1.25798	6.98193
kc04	261	924	1	Orth	rel	v1-2	D069	L1	83.58	4.4258	0.483372	6.82871
kc04	263	762	1	ID	unrel	v1-2	D131	L1	3.51	1.25562	-0.336799	6.63595
kc04	267	752	1	Sem	rel	v1-2	D082	L1	8.18	2.10169	-0.387427	6.62274
kc04	275	987	1	Orth	rel	v1-2	D047	L1	17.77	2.87751	0.802327	6.89467
kc04	281	1239	0	Orth	unrel	v1-2	D065	L1	0.14	-1.96611	2.07815	7.12206
kc04	287	699	1	ID	unrel	v1-2	D126	L1	168.78	5.1286	-0.655754	6.54965
kc04	291	889	1	Sem	unrel	v1-2	D102	L1	32.03	3.46667	0.306174	6.7901
kc04	293	639	1	ID	rel	v1-2	D120	L1	10.14	2.31649	-0.959521	6.4599
kc04	297	765	1	Orth	rel	v1-2	D048	L1	17.77	2.87751	-0.32161	6.63988
kc04	303	1145	0	Sem	rel	v1-2	D076	L1	18.24	2.90362	1.60225	7.04316
kc04	307	911	1	ID	rel	v1-2	D128	L1	153.99	5.03689	0.417555	6.81454
kc04	314	680	1	Sem	rel	v1-2	D090	L1	14.59	2.68034	-0.751947	6.52209
kc04	316	719	1	Sem	unrel	v1-2	D083	L1	22.5	3.11352	-0.554498	6.57786
kc04	322	1219	1	Orth	unrel	v1-2	D060	L1	10.41	2.34277	1.97689	7.10579
kc04	328	1015	1	ID	rel	v1-2	D135	L1	37.3	3.61899	0.944084	6.92264
kc04	330	806	1	Morph	unrel	v1-2	D003	L1	1.15	0.139762	-0.114036	6.69208
kc04	338	921	1	ID	rel	v1-2	D133	L1	11.01	2.3988	0.468183	6.82546
kc04	346	628	1	Morph	rel	v1-2	D026	L1	38.99	3.66331	-1.01521	6.44254
kc04	352	680	1	ID	unrel	v1-2	D124	L1	1.62	0.482426	-0.751947	6.52209
kc04	356	845	0	Morph	rel	v1-2	D017	L1	27.36	3.30908	0.0834119	6.73934
kc04	364	688	1	Sem	unrel	v1-2	D096	L1	41.15	3.71722	-0.711444	6.53379
kc04	368	1118	1	Orth	unrel	v1-2	D062	L1	0.27	-1.30933	1.46555	7.0193
kc04	371	611	1	Sem	unrel	v1-2	D073	L1	16.76	2.819	-1.10128	6.4151
kc04	374	770	1	Sem	rel	v1-2	D087	L1	4.86	1.58104	-0.296297	6.64639
kc04	376	649	1	Morph	unrel	v1-2	D032	L1	12.77	2.5471	-0.908893	6.47543
kc04	381	533	1	ID	rel	v1-2	D143	L1	50.54	3.92277	-1.49618	6.27852
kc04	388	985	0	Morph	rel	v1-2	D015	L1	11.82	2.46979	0.792201	6.89264
kc04	390	1096	1	Orth	unrel	v1-2	D044	L1	10.1	2.31254	1.35417	6.99942
kc04	392	1223	1	ID	unrel	v1-2	D136	L1	0.2	-1.60944	1.99714	7.10906
kc04	396	1308	0	ID	unrel	v1-2	D110	L1	2.91	1.06815	2.42748	7.17625
kc04	400	858	1	Sem	unrel	v1-2	D089	L1	60.81	4.10775	0.149228	6.7546
kc04	406	782	1	Morph	unrel	v1-2	D002	L1	16.96	2.83086	-0.235543	6.66185
kc04	410	720	1	Sem	rel	v1-2	D080	L1	149.26	5.00569	-0.549435	6.57925
kc04	411	585	1	Sem	unrel	v1-2	D081	L1	7.3	1.98787	-1.23291	6.37161
kc04	420	800	1	ID	unrel	v1-2	D123	L1	16.82	2.82257	-0.144413	6.68461
kc04	424	1285	0	ID	rel	v1-2	D129	L1	1.55	0.438255	2.31103	7.15851
kc04	426	964	0	Morph	rel	v1-2	D005	L1	2.64	0.970779	0.685883	6.87109
kc04	428	883	1	Sem	rel	v1-2	D101	L1	79.05	4.37008	0.275798	6.78333
kc04	433	591	1	ID	rel	v1-2	D113	L1	9.32	2.23216	-1.20253	6.38182
kc04	436	1078	1	Orth	unrel	v1-2	D070	L1	8.11	2.0931	1.26304	6.98286
kc04	442	1002	1	Sem	unrel	v1-2	D094	L1	12.77	2.5471	0.878268	6.90975
kc04	446	871	1	Morph	rel	v1-2	D035	L1	8.58	2.14943	0.215044	6.76964
kc04	452	747	1	ID	rel	v1-2	D122	L1	60.27	4.09883	-0.41274	6.61607
kc04	454	738	1	Sem	rel	v1-2	D086	L1	24.19	3.18594	-0.458305	6.60394
kc04	460	942	1	Orth	rel	v1-2	D061	L1	17.03	2.83498	0.574502	6.84801
kc04	462	1109	1	Sem	rel	v1-2	D099	L1	34.66	3.54559	1.41999	7.01121
kc04	468	681	1	Morph	rel	v1-2	D030	L1	4.66	1.53902	-0.746884	6.52356
kc04	470	696	1	Morph	unrel	v1-2	D018	L1	7.57	2.02419	-0.670942	6.54535
kc04	474	982	0	Orth	unrel	v1-2	D043	L1	2.64	0.970779	0.777013	6.88959
kc04	481	577	1	ID	unrel	v1-2	D118	L1	3.58	1.27536	-1.27341	6.35784
kc04	490	860	1	Morph	unrel	v1-2	D010	L1	17.03	2.83498	0.159354	6.75693
kc04	493	569	0	ID	rel	v1-2	D109	L1	55.14	4.00988	-1.31392	6.34388
kc04	497	590	1	Morph	unrel	v1-2	D034	L1	18.65	2.92585	-1.2076	6.38012
kc04	504	851	1	Orth	unrel	v1-2	D040	L1	2.77	1.01885	0.113789	6.74641
kc04	506	729	1	Orth	unrel	v1-2	D054	L1	70.34	4.25334	-0.50387	6.59167
kc04	508	864	1	Orth	rel	v1-2	D071	L1	0.68	-0.385662	0.179605	6.76157
kc04	512	646	1	Morph	unrel	v1-2	D036	L1	10.34	2.33602	-0.924081	6.4708
kc04	514	924	0	Sem	rel	v1-2	D103	L1	44.19	3.7885	0.483372	6.82871
kc04	518	1090	1	Orth	rel	v1-2	D057	L1	1.22	0.198851	1.32379	6.99393
kc04	521	591	1	Sem	rel	v1-2	D104	L1	29.26	3.37622	-1.20253	6.38182
kc04	526	765	1	Orth	unrel	v1-2	D037	L1	257.57	5.55129	-0.32161	6.63988
kc04	528	1124	1	ID	rel	v1-2	D115	L1	13.18	2.5787	1.49593	7.02465
kc04	534	944	1	Morph	rel	v1-2	D014	L1	19.66	2.97859	0.584627	6.85013
kc04	540	817	0	Morph	rel	v1-2	D024	L1	13.45	2.59898	-0.0583459	6.70564
kc04	544	775	1	Morph	unrel	v1-2	D009	L1	6.08	1.805	-0.270983	6.65286
kc04	557	606	1	ID	rel	v1-2	D142	L1	38.24	3.64388	-1.12659	6.40688
kc04	559	589	1	ID	rel	v1-2	D116	L1	21.62	3.07362	-1.21266	6.37843
kc04	565	553	0	ID	rel	v1-2	D141	L1	10.68	2.36837	-1.39492	6.31536
kc04	570	750	1	Sem	unrel	v1-2	D098	L1	8.72	2.16562	-0.397552	6.62007
kc04	576	987	1	Orth	unrel	v1-2	D050	L1	28.38	3.34568	0.802327	6.89467
kc04	578	913	1	Sem	rel	v1-2	D100	L1	185.61	5.22365	0.427681	6.81674
kc04	582	703	1	ID	rel	v1-2	D144	L1	0.68	-0.385662	-0.635503	6.55536
kc04	584	734	1	Morph	unrel	v1-2	D012	L1	58.78	4.0738	-0.478557	6.59851
kc04	588	627	1	Orth	rel	v1-2	D045	L1	30.88	3.43011	-1.02027	6.44095
kc04	590	978	0	Morph	unrel	v1-2	D007	L1	1.69	0.524729	0.756762	6.88551
kc04	596	870	1	ID	rel	v1-2	D132	L1	41.49	3.72545	0.209981	6.76849
kc04	598	685	1	Orth	unrel	v1-2	D072	L1	82.5	4.4128	-0.726633	6.52942
kc04	600	988	0	ID	rel	v1-2	D114	L1	11.01	2.3988	0.807389	6.89568
kc04	605	848	1	Sem	unrel	v1-2	D084	L1	19.19	2.95439	0.0986003	6.74288
kc04	613	755	1	ID	unrel	v1-2	D117	L1	2.36	0.858662	-0.372238	6.62672
kc04	619	880	1	Morph	rel	v1-2	D029	L1	6.01	1.79342	0.260609	6.77992
kc04	621	782	1	Morph	rel	v1-2	D023	L1	3.83	1.34286	-0.235543	6.66185
kc04	622	525	0	Sem	rel	v1-2	D108	L1	1.76	0.565314	-1.53668	6.2634
kc04	627	826	1	Orth	rel	v1-2	D056	L1	5.58	1.71919	-0.0127809	6.71659
kc04	629	633	1	Orth	rel	v1-2	D067	L1	18.45	2.91506	-0.989897	6.45047
kc04	633	783	1	ID	rel	v1-2	D121	L1	9.8	2.28238	-0.23048	6.66313
kc04	637	708	1	Morph	unrel	v1-2	D033	L1	66.69	4.20006	-0.610189	6.56244
kc04	639	731	1	ID	unrel	v1-2	D111	L1	15.2	2.7213	-0.493745	6.59441
kc04	642	568	1	ID	unrel	v1-2	D140	L1	16.69	2.81481	-1.31898	6.34212
kc04	647	758	0	Orth	unrel	v1-2	D038	L1	0.273	-1.29828	-0.35705	6.63068
kc04	649	725	1	Sem	rel	v1-2	D079	L1	18.65	2.92585	-0.524122	6.58617
kc04	651	819	0	Sem	rel	v1-2	D088	L1	2.03	0.708036	-0.0482203	6.70808
kc04	655	1265	1	Sem	unrel	v1-2	D093	L1	11.49	2.44148	2.20978	7.14283
kc04	659	934	1	ID	rel	v1-2	D138	L1	19.59	2.97502	0.533999	6.83948
kc04	661	1077	1	ID	unrel	v1-2	D119	L1	20	2.99573	1.25798	6.98193
kc04	663	796	1	Sem	unrel	v1-2	D091	L1	15.41	2.73502	-0.164664	6.6796
kc04	667	649	1	ID	rel	v1-2	D131	L1	3.51	1.25562	-0.908893	6.47543
kc04	675	1060	0	ID	rel	v1-2	D139	L1	2.03	0.708036	1.17191	6.96602
kc04	677	683	1	Morph	rel	v1-2	D022	L1	5.61	1.72455	-0.736758	6.52649
kc04	683	1143	0	Orth	rel	v1-2	D065	L1	0.14	-1.96611	1.59212	7.04141
kc04	686	581	1	Sem	rel	v1-2	D105	L1	163.78	5.09852	-1.25316	6.36475
kc04	695	672	1	ID	unrel	v1-2	D134	L1	12.91	2.558	-0.792449	6.51026
kc04	699	741	1	Orth	unrel	v1-2	D064	L1	164.12	5.1006	-0.443117	6.608
kc04	703	650	1	Orth	rel	v1-2	D058	L1	15.14	2.71734	-0.90383	6.47697
kc04	705	753	1	Sem	unrel	v1-2	D078	L1	13.78	2.62322	-0.382364	6.62407
kc04	713	764	1	Sem	unrel	v1-2	D075	L1	11.89	2.4757	-0.326673	6.63857
kc04	715	763	1	Sem	unrel	v1-2	D090	L1	14.59	2.68034	-0.331736	6.63726
kc04	723	1054	1	Sem	rel	v1-2	D102	L1	32.03	3.46667	1.14153	6.96035
kc04	727	811	1	Morph	unrel	v1-2	D028	L1	41.82	3.73337	-0.0887226	6.69827
kc04	729	714	1	ID	unrel	v1-2	D135	L1	37.3	3.61899	-0.579812	6.57088
kc04	731	1105	1	Morph	rel	v1-2	D003	L1	1.15	0.139762	1.39973	7.0076
kc04	739	1196	1	ID	unrel	v1-2	D133	L1	11.01	2.3988	1.86045	7.08674
kc04	741	786	1	Morph	unrel	v1-2	D001	L1	28.51	3.35025	-0.215292	6.66696
kc04	747	743	1	Morph	unrel	v1-2	D026	L1	38.99	3.66331	-0.432992	6.6107
kc04	753	659	1	ID	rel	v1-2	D124	L1	1.62	0.482426	-0.858265	6.49072
kc04	755	674	1	Orth	rel	v1-2	D068	L1	7.97	2.07568	-0.782323	6.51323
kc04	756	624	1	ID	rel	v1-2	D126	L1	168.78	5.1286	-1.03546	6.43615
kc04	765	675	1	Sem	rel	v1-2	D096	L1	41.15	3.71722	-0.777261	6.51471
kc04	767	858	0	ID	unrel	v1-2	D120	L1	10.14	2.31649	0.149228	6.7546
kc04	772	606	1	Orth	rel	v1-2	D059	L1	24.3	3.19048	-1.12659	6.40688
kc04	781	945	0	Sem	unrel	v1-2	D095	L1	1.15	0.139762	0.58969	6.85118
kc04	783	920	1	Morph	rel	v1-2	D031	L1	20.61	3.02578	0.46312	6.82437
kc04	789	1068	1	Morph	unrel	v1-2	D015	L1	11.82	2.46979	1.21241	6.97354
kc04	791	915	1	Orth	rel	v1-2	D044	L1	10.1	2.31254	0.437806	6.81892
kc04	799	790	1	Morph	unrel	v1-2	D027	L1	24.93	3.21607	-0.195041	6.67203
kc04	806	529	0	Sem	rel	v1-2	D089	L1	60.81	4.10775	-1.51643	6.27099
kc04	811	1142	1	Sem	unrel	v1-2	D107	L1	3.45	1.23837	1.58706	7.04054
kc04	813	653	1	Sem	rel	v1-2	D081	L1	7.3	1.98787	-0.888642	6.48158
kc04	817	674	1	Sem	unrel	v1-2	D074	L1	9.26	2.2257	-0.782323	6.51323
kc04	820	608	1	ID	rel	v1-2	D123	L1	16.82	2.82257	-1.11647	6.41017
kc04	827	1020	0	Morph	unrel	v1-2	D005	L1	2.64	0.970779	0.969398	6.92756
kc04	829	915	1	ID	unrel	v1-2	D128	L1	153.99	5.03689	0.437806	6.81892
kc04	833	720	1	Sem	unrel	v1-2	D085	L1	54.12	3.9912	-0.549435	6.57925
kc04	835	975	1	Sem	rel	v1-2	D092	L1	20.07	2.99923	0.741573	6.88244
kc04	837	822	1	Morph	rel	v1-2	D002	L1	16.96	2.83086	-0.033032	6.71174
kc04	841	763	1	Orth	unrel	v1-2	D066	L1	27.09	3.29916	-0.331736	6.63726
kc04	843	842	1	Sem	rel	v1-2	D094	L1	12.77	2.5471	0.0682236	6.73578
kc04	845	657	1	Morph	unrel	v1-2	D021	L1	3.11	1.13462	-0.868391	6.48768
kc04	849	902	1	Orth	unrel	v1-2	D055	L1	0.47	-0.755023	0.37199	6.80461
kc04	852	540	1	Orth	unrel	v1-2	D069	L1	83.58	4.4258	-1.46074	6.29157
kc04	855	627	1	Sem	unrel	v1-2	D086	L1	24.19	3.18594	-1.02027	6.44095
kc04	856	601	1	Orth	rel	v1-2	D041	L1	29.8	3.39451	-1.15191	6.39859
kc04	861	847	0	Orth	unrel	v1-2	D051	L1	0.74	-0.301105	0.0935375	6.7417
kc04	863	685	1	Sem	unrel	v1-2	D099	L1	34.66	3.54559	-0.726633	6.52942
kc04	864	612	1	Orth	rel	v1-2	D053	L1	31.96	3.46449	-1.09622	6.41673
kc04	871	800	1	Morph	unrel	v1-2	D030	L1	4.66	1.53902	-0.144413	6.68461
kc04	873	1215	1	ID	rel	v1-2	D125	L1	5.54	1.71199	1.95664	7.1025
kc04	875	702	1	ID	unrel	v1-2	D143	L1	50.54	3.92277	-0.640565	6.55393
kc04	885	976	1	Morph	unrel	v1-2	D019	L1	0.47	-0.755023	0.746636	6.88346
kc04	887	750	1	Sem	rel	v1-2	D106	L1	18.38	2.91126	-0.397552	6.62007
kc04	896	758	1	ID	unrel	v1-2	D109	L1	55.14	4.00988	-0.35705	6.63068
kc04	898	685	1	ID	unrel	v1-2	D127	L1	10.41	2.34277	-0.726633	6.52942
kc04	900	772	1	Sem	unrel	v1-2	D082	L1	8.18	2.10169	-0.286171	6.64898
kc04	906	784	1	Orth	rel	v1-2	D040	L1	2.77	1.01885	-0.225418	6.66441
kc04	908	1159	1	ID	rel	v1-2	D137	L1	3.72	1.31372	1.67312	7.05531
kc04	910	701	1	Orth	unrel	v1-2	D071	L1	0.68	-0.385662	-0.645628	6.55251
kc04	914	1043	1	Sem	rel	v1-2	D073	L1	16.76	2.819	1.08584	6.94986
kc04	918	656	1	Sem	unrel	v1-2	D080	L1	149.26	5.00569	-0.873453	6.48616
kc04	920	727	1	Orth	unrel	v1-2	D057	L1	1.22	0.198851	-0.513996	6.58893
kc04	928	650	1	Orth	rel	v1-2	D037	L1	257.57	5.55129	-0.90383	6.47697
kc04	930	769	1	ID	unrel	v1-2	D115	L1	13.18	2.5787	-0.301359	6.64509
kc04	938	1100	1	Morph	rel	v1-2	D032	L1	12.77	2.5471	1.37442	7.00307
kc04	942	865	0	Morph	unrel	v1-2	D024	L1	13.45	2.59898	0.184668	6.76273
kc04	950	1268	1	Morph	unrel	v1-2	D011	L1	1.22	0.198851	2.22497	7.1452
kc04	952	675	1	Orth	rel	v1-2	D060	L1	10.41	2.34277	-0.777261	6.51471
kc04	960	806	1	Morph	unrel	v1-2	D014	L1	19.66	2.97859	-0.114036	6.69208
kc04	963	555	1	Morph	rel	v1-2	D006	L1	40.47	3.70056	-1.38479	6.31897
kc04	966	682	0	Morph	unrel	v1-2	D013	L1	2.03	0.708036	-0.741821	6.52503
kc04	974	757	1	ID	rel	v1-2	D110	L1	2.91	1.06815	-0.362113	6.62936
kc04	978	874	1	Sem	unrel	v1-2	D076	L1	18.24	2.90362	0.230233	6.77308
kc04	982	784	0	Orth	unrel	v1-2	D052	L1	0.07	-2.65926	-0.225418	6.66441
kc04	990	667	1	Orth	unrel	v1-2	D045	L1	30.88	3.43011	-0.817763	6.50279
kc04	992	1010	0	ID	rel	v1-2	D136	L1	0.2	-1.60944	0.918771	6.91771
kc04	1000	924	1	Orth	rel	v1-2	D072	L1	82.5	4.4128	0.483372	6.82871
kc04	1002	787	1	Sem	rel	v1-2	D097	L1	43.85	3.78077	-0.210229	6.66823
kc04	1008	792	1	Orth	rel	v1-2	D049	L1	6.35	1.84845	-0.184915	6.67456
kc04	1014	652	1	ID	rel	v1-2	D117	L1	2.36	0.858662	-0.893704	6.48004
kc04	1020	784	1	Morph	unrel	v1-2	D029	L1	6.01	1.79342	-0.225418	6.66441
kc04	1023	517	0	Sem	unrel	v1-2	D108	L1	1.76	0.565314	-1.57718	6.24804
kc04	1030	698	1	Orth	rel	v1-2	D046	L1	0.61	-0.494296	-0.660817	6.54822
kc04	1032	1096	1	ID	unrel	v1-2	D129	L1	1.55	0.438255	1.35417	6.99942
kc04	1034	775	1	Morph	rel	v1-2	D004	L1	4.8	1.56862	-0.270983	6.65286
kc04	1040	643	1	ID	rel	v1-2	D111	L1	15.2	2.7213	-0.939269	6.46614
kc04	1042	834	1	Orth	unrel	v1-2	D048	L1	17.77	2.87751	0.0277214	6.72623
kc04	1048	630	0	Orth	rel	v1-2	D038	L1	0.273	-1.29828	-1.00509	6.44572
kc04	1050	669	1	Sem	unrel	v1-2	D079	L1	18.65	2.92585	-0.807637	6.50578
kc04	1056	753	1	Sem	rel	v1-2	D083	L1	22.5	3.11352	-0.382364	6.62407
kc04	1060	687	1	ID	unrel	v1-2	D138	L1	19.59	2.97502	-0.716507	6.53233
kc04	1068	634	1	Sem	unrel	v1-2	D103	L1	44.19	3.7885	-0.984834	6.45205
kc04	1074	742	1	Morph	rel	v1-2	D020	L1	29.19	3.37383	-0.438054	6.60935
kc04	1076	877	1	ID	unrel	v1-2	D112	L1	19.05	2.94707	0.245421	6.77651
kc04	1078	667	1	Morph	unrel	v1-2	D022	L1	5.61	1.72455	-0.817763	6.50279
kc04	1081	601	1	ID	unrel	v1-2	D122	L1	60.27	4.09883	-1.15191	6.39859
kc04	1085	542	1	Orth	unrel	v1-2	D047	L1	17.77	2.87751	-1.45061	6.29527
kc04	1087	597	1	Sem	unrel	v1-2	D105	L1	163.78	5.09852	-1.17216	6.39192
kc04	1090	628	1	Morph	rel	v1-2	D016	L1	178.04	5.18201	-1.01521	6.44254
kc04	1094	721	1	Orth	unrel	v1-2	D039	L1	12.64	2.53687	-0.544373	6.58064
kc04	1096	824	1	ID	rel	v1-2	D134	L1	12.91	2.558	-0.0229064	6.71417
kc04	1100	854	1	Morph	unrel	v1-2	D017	L1	27.36	3.30908	0.128977	6.74993
kc04	1103	555	1	Sem	unrel	v1-2	D104	L1	29.26	3.37622	-1.38479	6.31897
kc04	1105	602	1	Morph	unrel	v1-2	D008	L1	24.86	3.21326	-1.14684	6.40026
kc04	1107	568	0	ID	unrel	v1-2	D130	L1	2.57	0.943906	-1.31898	6.34212
kc04	1114	773	1	Sem	unrel	v1-2	D087	L1	4.86	1.58104	-0.281108	6.65028
kc04	1122	696	1	ID	rel	v1-2	D140	L1	16.69	2.81481	-0.670942	6.54535
kc04	1126	741	0	Sem	unrel	v1-2	D077	L1	1.62	0.482426	-0.443117	6.608
kc04	1128	892	1	Morph	rel	v1-2	D028	L1	41.82	3.73337	0.321363	6.79347
kc04	1130	770	1	Sem	unrel	v1-2	D101	L1	79.05	4.37008	-0.296297	6.64639
kc04	1134	744	1	Orth	rel	v1-2	D070	L1	8.11	2.0931	-0.427929	6.61204
kc04	1138	757	1	Morph	unrel	v1-2	D035	L1	8.58	2.14943	-0.362113	6.62936
kc04	1146	728	1	ID	unrel	v1-2	D114	L1	11.01	2.3988	-0.508933	6.5903
kc04	1149	582	0	ID	unrel	v1-2	D139	L1	2.03	0.708036	-1.2481	6.36647
kc04	1152	885	1	Orth	unrel	v1-2	D061	L1	17.03	2.83498	0.285923	6.78559
kc04	1154	771	1	Morph	rel	v1-2	D018	L1	7.57	2.02419	-0.291234	6.64769
kc04	1157	569	1	Orth	unrel	v1-2	D068	L1	7.97	2.07568	-1.31392	6.34388
kc04	1164	629	1	Morph	unrel	v1-2	D023	L1	3.83	1.34286	-1.01015	6.44413
kc04	1167	555	1	ID	rel	v1-2	D118	L1	3.58	1.27536	-1.38479	6.31897
kc04	1170	761	0	Orth	unrel	v1-2	D063	L1	0.07	-2.65926	-0.341862	6.63463
kc04	1174	751	1	Orth	unrel	v1-2	D059	L1	24.3	3.19048	-0.392489	6.62141
kc04	1176	878	1	Morph	rel	v1-2	D025	L1	48.85	3.88875	0.250484	6.77765
kc05	25	855	1	ID	rel	v2-2	D111	L1	15.2	2.7213	2.36701	6.7511
kc05	27	646	1	Sem	unrel	v2-2	D103	L1	44.19	3.7885	0.351917	6.4708
kc05	31	691	1	Orth	unrel	v2-2	D059	L1	24.3	3.19048	0.785788	6.53814
kc05	33	722	1	Morph	rel	v2-2	D034	L1	18.65	2.92585	1.08468	6.58203
kc05	39	631	1	Orth	rel	v2-2	D064	L1	164.12	5.1006	0.207294	6.44731
kc05	49	688	1	Sem	rel	v2-2	D088	L1	2.03	0.708036	0.756863	6.53379
kc05	51	751	1	ID	unrel	v2-2	D114	L1	11.01	2.3988	1.36428	6.62141
kc05	53	726	1	ID	rel	v2-2	D123	L1	16.82	2.82257	1.12324	6.58755
kc05	61	633	1	Orth	unrel	v2-2	D037	L1	257.57	5.55129	0.226577	6.45047
kc05	65	654	1	Morph	unrel	v2-2	D023	L1	3.83	1.34286	0.42905	6.48311
kc05	66	605	1	Orth	unrel	v2-2	D046	L1	0.61	-0.494296	-0.0433871	6.40523
kc05	69	819	1	Sem	unrel	v2-2	D108	L1	1.76	0.565314	2.01991	6.70808
kc05	73	657	1	Morph	unrel	v2-2	D020	L1	29.19	3.37383	0.457975	6.48768
kc05	75	704	1	ID	rel	v2-2	D131	L1	3.51	1.25562	0.911128	6.55678
kc05	83	755	1	Orth	unrel	v2-2	D053	L1	31.96	3.46449	1.40285	6.62672
kc05	85	705	1	Morph	rel	v2-2	D012	L1	58.78	4.0738	0.92077	6.5582
kc05	86	608	1	Orth	rel	v2-2	D069	L1	83.58	4.4258	-0.0144624	6.41017
kc05	91	814	1	ID	rel	v2-2	D139	L1	2.03	0.708036	1.9717	6.70196
kc05	93	700	1	Sem	rel	v2-2	D094	L1	12.77	2.5471	0.872562	6.55108
kc05	101	823	1	Orth	rel	v2-2	D067	L1	18.45	2.91506	2.05848	6.71296
kc05	109	818	1	Morph	rel	v2-2	D024	L1	13.45	2.59898	2.01027	6.70686
kc05	111	681	1	Sem	rel	v2-2	D082	L1	8.18	2.10169	0.689372	6.52356
kc05	114	598	1	Sem	unrel	v2-2	D102	L1	32.03	3.46667	-0.110878	6.39359
kc05	117	693	1	Sem	rel	v2-2	D098	L1	8.72	2.16562	0.805071	6.54103
kc05	119	764	1	Sem	rel	v2-2	D089	L1	60.81	4.10775	1.48962	6.63857
kc05	126	583	1	Morph	unrel	v2-2	D001	L1	28.51	3.35025	-0.255502	6.36819
kc05	129	662	1	Sem	rel	v2-2	D076	L1	18.24	2.90362	0.506182	6.49527
kc05	131	708	1	Morph	rel	v2-2	D005	L1	2.64	0.970779	0.949695	6.56244
kc05	134	586	1	Morph	unrel	v2-2	D006	L1	40.47	3.70056	-0.226577	6.37332
kc05	136	608	1	ID	rel	v2-2	D116	L1	21.62	3.07362	-0.0144624	6.41017
kc05	143	677	1	Morph	unrel	v2-2	D017	L1	27.36	3.30908	0.650806	6.51767
kc05	145	659	1	ID	unrel	v2-2	D143	L1	50.54	3.92277	0.477258	6.49072
kc05	149	633	1	Sem	rel	v2-2	D099	L1	34.66	3.54559	0.226577	6.45047
kc05	151	736	1	ID	rel	v2-2	D125	L1	5.54	1.71199	1.21966	6.60123
kc05	152	598	1	Sem	unrel	v2-2	D074	L1	9.26	2.2257	-0.110878	6.39359
kc05	159	698	1	Morph	rel	v2-2	D028	L1	41.82	3.73337	0.853279	6.54822
kc05	163	696	1	Orth	rel	v2-2	D070	L1	8.11	2.0931	0.833996	6.54535
kc05	169	628	1	ID	rel	v2-2	D127	L1	10.41	2.34277	0.178369	6.44254
kc05	175	688	1	Morph	unrel	v2-2	D031	L1	20.61	3.02578	0.756863	6.53379
kc05	177	655	1	Morph	rel	v2-2	D002	L1	16.96	2.83086	0.438691	6.48464
kc05	178	446	1	ID	rel	v2-2	D134	L1	12.91	2.558	-1.5764	6.10032
kc05	183	748	1	Morph	rel	v2-2	D015	L1	11.82	2.46979	1.33536	6.6174
kc05	184	594	1	Sem	unrel	v2-2	D086	L1	24.19	3.18594	-0.149444	6.38688
kc05	192	557	1	Orth	unrel	v2-2	D068	L1	7.97	2.07568	-0.506182	6.32257
kc05	198	609	1	Morph	unrel	v2-2	D030	L1	4.66	1.53902	-0.00482079	6.41182
kc05	202	615	1	Orth	unrel	v2-2	D054	L1	70.34	4.25334	0.0530286	6.42162
kc05	209	635	1	Sem	rel	v2-2	D100	L1	185.61	5.22365	0.24586	6.45362
kc05	211	634	1	Morph	unrel	v2-2	D011	L1	1.22	0.198851	0.236218	6.45205
kc05	212	600	1	Orth	rel	v2-2	D060	L1	10.41	2.34277	-0.0915949	6.39693
kc05	218	597	1	Orth	unrel	v2-2	D061	L1	17.03	2.83498	-0.12052	6.39192
kc05	224	601	1	Sem	unrel	v2-2	D084	L1	19.19	2.95439	-0.0819533	6.39859
kc05	230	485	1	ID	rel	v2-2	D118	L1	3.58	1.27536	-1.20038	6.18415
kc05	235	779	1	Orth	unrel	v2-2	D052	L1	0.07	-2.65926	1.63425	6.65801
kc05	237	793	1	ID	unrel	v2-2	D110	L1	2.91	1.06815	1.76923	6.67582
kc05	242	462	1	Sem	rel	v2-2	D104	L1	29.26	3.37622	-1.42213	6.13556
kc05	244	516	1	Sem	rel	v2-2	D073	L1	16.76	2.819	-0.901487	6.24611
kc05	247	755	1	Orth	unrel	v2-2	D038	L1	0.273	-1.29828	1.40285	6.62672
kc05	252	607	1	Sem	rel	v2-2	D091	L1	15.41	2.73502	-0.0241039	6.40853
kc05	254	598	1	Orth	rel	v2-2	D066	L1	27.09	3.29916	-0.110878	6.39359
kc05	259	643	1	Morph	unrel	v2-2	D026	L1	38.99	3.66331	0.322993	6.46614
kc05	260	442	1	Morph	rel	v2-2	D022	L1	5.61	1.72455	-1.61496	6.09131
kc05	269	717	1	Sem	unrel	v2-2	D083	L1	22.5	3.11352	1.03647	6.57508
kc05	273	699	1	Sem	rel	v2-2	D079	L1	18.65	2.92585	0.86292	6.54965
kc05	277	672	1	Sem	unrel	v2-2	D106	L1	18.38	2.91126	0.602598	6.51026
kc05	278	471	1	ID	rel	v2-2	D121	L1	9.8	2.28238	-1.33536	6.15486
kc05	287	714	1	Orth	rel	v2-2	D043	L1	2.64	0.970779	1.00754	6.57088
kc05	291	687	1	Sem	rel	v2-2	D093	L1	11.49	2.44148	0.747222	6.53233
kc05	295	765	1	ID	unrel	v2-2	D120	L1	10.14	2.31649	1.49926	6.63988
kc05	298	530	1	Orth	unrel	v2-2	D048	L1	17.77	2.87751	-0.766505	6.27288
kc05	302	512	1	Morph	unrel	v2-2	D016	L1	178.04	5.18201	-0.940053	6.23832
kc05	311	731	1	ID	rel	v2-2	D124	L1	1.62	0.482426	1.17145	6.59441
kc05	319	594	1	ID	rel	v2-2	D140	L1	16.69	2.81481	-0.149444	6.38688
kc05	325	478	1	Orth	unrel	v2-2	D063	L1	0.07	-2.65926	-1.26787	6.16961
kc05	328	757	1	Sem	unrel	v2-2	D077	L1	1.62	0.482426	1.42213	6.62936
kc05	332	682	1	Morph	rel	v2-2	D013	L1	2.03	0.708036	0.699014	6.52503
kc05	333	625	1	Orth	unrel	v2-2	D062	L1	0.27	-1.30933	0.149444	6.43775
kc05	337	526	1	ID	unrel	v2-2	D113	L1	9.32	2.23216	-0.805071	6.2653
kc05	343	546	1	Sem	rel	v2-2	D107	L1	3.45	1.23837	-0.61224	6.30262
kc05	346	633	1	Orth	unrel	v2-2	D071	L1	0.68	-0.385662	0.226577	6.45047
kc05	347	584	1	ID	unrel	v2-2	D109	L1	55.14	4.00988	-0.24586	6.3699
kc05	356	843	1	Sem	rel	v2-2	D097	L1	43.85	3.78077	2.25131	6.73697
kc05	359	552	1	Orth	rel	v2-2	D058	L1	15.14	2.71734	-0.55439	6.31355
kc05	367	507	1	Orth	unrel	v2-2	D041	L1	29.8	3.39451	-0.988261	6.22851
kc05	375	542	1	Morph	unrel	v2-2	D035	L1	8.58	2.14943	-0.650806	6.29527
kc05	384	665	1	Morph	unrel	v2-2	D008	L1	24.86	3.21326	0.535107	6.49979
kc05	385	552	1	ID	rel	v2-2	D144	L1	0.68	-0.385662	-0.55439	6.31355
kc05	394	627	1	ID	unrel	v2-2	D132	L1	41.49	3.72545	0.168727	6.44095
kc05	401	614	1	ID	unrel	v2-2	D135	L1	37.3	3.61899	0.0433871	6.41999
kc05	407	538	1	Orth	unrel	v2-2	D040	L1	2.77	1.01885	-0.689372	6.28786
kc05	409	585	1	Morph	unrel	v2-2	D021	L1	3.11	1.13462	-0.236218	6.37161
kc05	413	542	1	Orth	unrel	v2-2	D050	L1	28.38	3.34568	-0.650806	6.29527
kc05	415	589	1	ID	unrel	v2-2	D119	L1	20	2.99573	-0.197652	6.37843
kc05	419	594	1	ID	unrel	v2-2	D122	L1	60.27	4.09883	-0.149444	6.38688
kc05	425	503	1	Morph	unrel	v2-2	D036	L1	10.34	2.33602	-1.02683	6.22059
kc05	432	682	1	Orth	rel	v2-2	D042	L1	0.27	-1.30933	0.699014	6.52503
kc05	434	827	1	Sem	unrel	v2-2	D095	L1	1.15	0.139762	2.09704	6.7178
kc05	435	560	1	Morph	rel	v2-2	D010	L1	17.03	2.83498	-0.477258	6.32794
kc05	439	523	1	Morph	rel	v2-2	D003	L1	1.15	0.139762	-0.833996	6.25958
kc05	441	538	1	ID	rel	v2-2	D136	L1	0.2	-1.60944	-0.689372	6.28786
kc05	445	584	1	Morph	unrel	v2-2	D032	L1	12.77	2.5471	-0.24586	6.3699
kc05	447	550	1	ID	unrel	v2-2	D133	L1	11.01	2.3988	-0.573673	6.30992
kc05	451	548	1	Orth	rel	v2-2	D057	L1	1.22	0.198851	-0.592957	6.30628
kc05	453	498	1	ID	rel	v2-2	D138	L1	19.59	2.97502	-1.07503	6.2106
kc05	461	584	1	Orth	rel	v2-2	D044	L1	10.1	2.31254	-0.24586	6.3699
kc05	465	542	1	ID	unrel	v2-2	D141	L1	10.68	2.36837	-0.650806	6.29527
kc05	469	523	1	Sem	rel	v2-2	D108	L1	1.76	0.565314	-0.833996	6.25958
kc05	472	690	1	Morph	unrel	v2-2	D019	L1	0.47	-0.755023	0.776146	6.53669
kc05	473	536	1	ID	unrel	v2-2	D142	L1	38.24	3.64388	-0.708655	6.28413
kc05	477	502	1	Morph	rel	v2-2	D014	L1	19.66	2.97859	-1.03647	6.2186
kc05	479	557	1	ID	unrel	v2-2	D115	L1	13.18	2.5787	-0.506182	6.32257
kc05	481	604	1	Sem	unrel	v2-2	D101	L1	79.05	4.37008	-0.0530286	6.40357
kc05	486	657	1	Morph	unrel	v2-2	D029	L1	6.01	1.79342	0.457975	6.48768
kc05	487	544	1	Morph	rel	v2-2	D004	L1	4.8	1.56862	-0.631523	6.29895
kc05	489	553	1	Orth	unrel	v2-2	D051	L1	0.74	-0.301105	-0.544749	6.31536
kc05	493	606	1	ID	rel	v2-2	D137	L1	3.72	1.31372	-0.0337455	6.40688
kc05	499	571	1	ID	unrel	v2-2	D128	L1	153.99	5.03689	-0.3712	6.34739
kc05	501	593	1	Orth	rel	v2-2	D045	L1	30.88	3.43011	-0.159086	6.38519
kc05	503	600	1	Sem	unrel	v2-2	D078	L1	13.78	2.62322	-0.0915949	6.39693
kc05	510	860	1	ID	unrel	v2-2	D129	L1	1.55	0.438255	2.41521	6.75693
kc05	511	563	1	Sem	unrel	v2-2	D082	L1	8.18	2.10169	-0.448333	6.33328
kc05	513	530	1	Orth	rel	v2-2	D039	L1	12.64	2.53687	-0.766505	6.27288
kc05	517	551	1	Morph	rel	v2-2	D033	L1	66.69	4.20006	-0.564032	6.31173
kc05	525	490	1	Sem	rel	v2-2	D087	L1	4.86	1.58104	-1.15217	6.19441
kc05	533	549	1	Sem	unrel	v2-2	D085	L1	54.12	3.9912	-0.583315	6.3081
kc05	537	539	1	ID	unrel	v2-2	D116	L1	21.62	3.07362	-0.679731	6.28972
kc05	544	719	1	Morph	rel	v2-2	D017	L1	27.36	3.30908	1.05575	6.57786
kc05	545	574	1	ID	rel	v2-2	D143	L1	50.54	3.92277	-0.342276	6.35263
kc05	549	563	1	Sem	unrel	v2-2	D099	L1	34.66	3.54559	-0.448333	6.33328
kc05	551	610	1	ID	unrel	v2-2	D125	L1	5.54	1.71199	0.00482079	6.41346
kc05	554	649	1	Sem	rel	v2-2	D074	L1	9.26	2.2257	0.380842	6.47543
kc05	560	677	1	Morph	unrel	v2-2	D028	L1	41.82	3.73337	0.650806	6.51767
kc05	563	506	1	Morph	rel	v2-2	D027	L1	24.93	3.21607	-0.997902	6.22654
kc05	569	598	1	Morph	unrel	v2-2	D009	L1	6.08	1.805	-0.110878	6.39359
kc05	571	597	1	Morph	rel	v2-2	D001	L1	28.51	3.35025	-0.12052	6.39192
kc05	577	513	1	Morph	rel	v2-2	D006	L1	40.47	3.70056	-0.930411	6.24028
kc05	579	504	1	ID	unrel	v2-2	D134	L1	12.91	2.558	-1.01719	6.22258
kc05	584	782	1	Morph	unrel	v2-2	D015	L1	11.82	2.46979	1.66317	6.66185
kc05	585	500	1	Morph	rel	v2-2	D018	L1	7.57	2.02419	-1.05575	6.21461
kc05	593	535	1	Orth	rel	v2-2	D068	L1	7.97	2.07568	-0.718297	6.28227
kc05	598	629	1	ID	rel	v2-2	D117	L1	2.36	0.858662	0.188011	6.44413
kc05	599	524	1	Morph	rel	v2-2	D030	L1	4.66	1.53902	-0.824354	6.26149
kc05	604	581	1	Sem	unrel	v2-2	D092	L1	20.07	2.99923	-0.274785	6.36475
kc05	608	499	1	ID	unrel	v2-2	D112	L1	19.05	2.94707	-1.06539	6.21261
kc05	613	688	1	Morph	rel	v2-2	D011	L1	1.22	0.198851	0.756863	6.53379
kc05	614	535	1	Orth	unrel	v2-2	D060	L1	10.41	2.34277	-0.718297	6.28227
kc05	616	566	1	Sem	rel	v2-2	D090	L1	14.59	2.68034	-0.419408	6.33859
kc05	620	483	1	Orth	rel	v2-2	D061	L1	17.03	2.83498	-1.21966	6.18002
kc05	628	606	1	Sem	rel	v2-2	D086	L1	24.19	3.18594	-0.0337455	6.40688
kc05	636	489	1	ID	unrel	v2-2	D118	L1	3.58	1.27536	-1.16181	6.19236
kc05	645	708	1	Orth	unrel	v2-2	D056	L1	5.58	1.71919	0.949695	6.56244
kc05	646	499	1	Sem	unrel	v2-2	D073	L1	16.76	2.819	-1.06539	6.21261
kc05	648	482	1	Sem	rel	v2-2	D105	L1	163.78	5.09852	-1.2293	6.17794
kc05	652	431	1	Orth	rel	v2-2	D038	L1	0.273	-1.29828	-1.72102	6.06611
kc05	654	494	1	Sem	unrel	v2-2	D091	L1	15.41	2.73502	-1.1136	6.20254
kc05	658	491	1	Sem	unrel	v2-2	D075	L1	11.89	2.4757	-1.14253	6.19644
kc05	661	663	1	Orth	rel	v2-2	D049	L1	6.35	1.84845	0.515824	6.49677
kc05	668	568	1	Sem	rel	v2-2	D096	L1	41.15	3.71722	-0.400125	6.34212
kc05	676	562	1	ID	rel	v2-2	D130	L1	2.57	0.943906	-0.457975	6.3315
kc05	679	633	1	Sem	rel	v2-2	D106	L1	18.38	2.91126	0.226577	6.45047
kc05	680	504	1	ID	unrel	v2-2	D121	L1	9.8	2.28238	-1.01719	6.22258
kc05	685	725	1	Orth	unrel	v2-2	D072	L1	82.5	4.4128	1.1136	6.58617
kc05	688	619	1	Morph	rel	v2-2	D025	L1	48.85	3.88875	0.0915949	6.42811
kc05	690	482	1	Sem	rel	v2-2	D080	L1	149.26	5.00569	-1.2293	6.17794
kc05	694	447	1	ID	rel	v2-2	D126	L1	168.78	5.1286	-1.56676	6.10256
kc05	696	518	1	ID	rel	v2-2	D120	L1	10.14	2.31649	-0.882204	6.24998
kc05	702	522	1	Morph	rel	v2-2	D031	L1	20.61	3.02578	-0.843637	6.25767
kc05	704	561	1	Morph	rel	v2-2	D016	L1	178.04	5.18201	-0.467616	6.32972
kc05	712	524	1	ID	unrel	v2-2	D124	L1	1.62	0.482426	-0.824354	6.26149
kc05	721	838	0	Orth	unrel	v2-2	D065	L1	0.14	-1.96611	2.2031	6.73102
kc05	726	571	1	Orth	rel	v2-2	D063	L1	0.07	-2.65926	-0.3712	6.34739
kc05	729	706	1	Sem	rel	v2-2	D077	L1	1.62	0.482426	0.930411	6.55962
kc05	733	655	1	Morph	unrel	v2-2	D013	L1	2.03	0.708036	0.438691	6.48464
kc05	735	630	1	Orth	rel	v2-2	D062	L1	0.27	-1.30933	0.197652	6.44572
kc05	742	609	1	Sem	rel	v2-2	D081	L1	7.3	1.98787	-0.00482079	6.41182
kc05	746	622	1	Sem	unrel	v2-2	D107	L1	3.45	1.23837	0.12052	6.43294
kc05	749	637	1	Sem	rel	v2-2	D103	L1	44.19	3.7885	0.265143	6.45677
kc05	756	520	1	Orth	rel	v2-2	D047	L1	17.77	2.87751	-0.86292	6.25383
kc05	758	478	1	Morph	unrel	v2-2	D002	L1	16.96	2.83086	-1.26787	6.16961
kc05	760	549	1	Orth	rel	v2-2	D048	L1	17.77	2.87751	-0.583315	6.3081
kc05	768	512	1	Orth	rel	v2-2	D041	L1	29.8	3.39451	-0.940053	6.23832
kc05	776	539	1	Morph	rel	v2-2	D035	L1	8.58	2.14943	-0.679731	6.28972
kc05	784	542	1	Morph	rel	v2-2	D008	L1	24.86	3.21326	-0.650806	6.29527
kc05	786	525	1	Orth	rel	v2-2	D053	L1	31.96	3.46449	-0.814713	6.2634
kc05	788	612	1	ID	rel	v2-2	D109	L1	55.14	4.00988	0.0241039	6.41673
kc05	794	512	1	ID	rel	v2-2	D132	L1	41.49	3.72545	-0.940053	6.23832
kc05	802	475	1	ID	rel	v2-2	D135	L1	37.3	3.61899	-1.29679	6.16331
kc05	808	622	1	Orth	rel	v2-2	D040	L1	2.77	1.01885	0.12052	6.43294
kc05	810	566	1	Morph	rel	v2-2	D021	L1	3.11	1.13462	-0.419408	6.33859
kc05	815	747	1	ID	unrel	v2-2	D139	L1	2.03	0.708036	1.32572	6.61607
kc05	823	646	1	Sem	unrel	v2-2	D097	L1	43.85	3.78077	0.351917	6.4708
kc05	830	513	1	Orth	unrel	v2-2	D064	L1	164.12	5.1006	-0.930411	6.24028
kc05	834	607	1	Orth	unrel	v2-2	D070	L1	8.11	2.0931	-0.0241039	6.40853
kc05	836	549	1	Orth	rel	v2-2	D071	L1	0.68	-0.385662	-0.583315	6.3081
kc05	838	532	1	Orth	rel	v2-2	D037	L1	257.57	5.55129	-0.747222	6.27664
kc05	846	511	1	Morph	rel	v2-2	D032	L1	12.77	2.5471	-0.949695	6.23637
kc05	852	507	1	Orth	unrel	v2-2	D057	L1	1.22	0.198851	-0.988261	6.22851
kc05	854	498	1	ID	unrel	v2-2	D138	L1	19.59	2.97502	-1.07503	6.2106
kc05	862	581	1	Sem	unrel	v2-2	D104	L1	29.26	3.37622	-0.274785	6.36475
kc05	865	812	1	Orth	rel	v2-2	D052	L1	0.07	-2.65926	1.95242	6.6995
kc05	866	602	1	ID	rel	v2-2	D141	L1	10.68	2.36837	-0.0723118	6.40026
kc05	870	528	1	ID	rel	v2-2	D114	L1	11.01	2.3988	-0.785788	6.2691
kc05	872	502	1	Morph	rel	v2-2	D019	L1	0.47	-0.755023	-1.03647	6.2186
kc05	875	733	1	ID	rel	v2-2	D142	L1	38.24	3.64388	1.19073	6.59715
kc05	878	419	1	Morph	rel	v2-2	D026	L1	38.99	3.66331	-1.83672	6.03787
kc05	880	522	1	ID	rel	v2-2	D115	L1	13.18	2.5787	-0.843637	6.25767
kc05	884	551	1	ID	unrel	v2-2	D127	L1	10.41	2.34277	-0.564032	6.31173
kc05	886	462	1	Morph	rel	v2-2	D029	L1	6.01	1.79342	-1.42213	6.13556
kc05	895	522	1	Orth	rel	v2-2	D046	L1	0.61	-0.494296	-0.843637	6.25767
kc05	901	502	1	ID	rel	v2-2	D113	L1	9.32	2.23216	-1.03647	6.2186
kc05	907	506	1	Sem	unrel	v2-2	D100	L1	185.61	5.22365	-0.997902	6.22654
kc05	912	632	1	Sem	unrel	v2-2	D098	L1	8.72	2.16562	0.216935	6.44889
kc05	913	598	1	ID	unrel	v2-2	D144	L1	0.68	-0.385662	-0.110878	6.39359
kc05	916	661	1	Sem	rel	v2-2	D083	L1	22.5	3.11352	0.496541	6.49375
kc05	919	587	1	Morph	unrel	v2-2	D033	L1	66.69	4.20006	-0.216935	6.37502
kc05	921	561	0	Morph	unrel	v2-2	D005	L1	2.64	0.970779	-0.467616	6.32972
kc05	928	638	1	Sem	unrel	v2-2	D087	L1	4.86	1.58104	0.274785	6.45834
kc05	935	489	1	Sem	rel	v2-2	D102	L1	32.03	3.46667	-1.16181	6.19236
kc05	941	517	1	ID	rel	v2-2	D122	L1	60.27	4.09883	-0.891845	6.24804
kc05	943	540	1	Orth	unrel	v2-2	D067	L1	18.45	2.91506	-0.670089	6.29157
kc05	945	514	1	Sem	rel	v2-2	D101	L1	79.05	4.37008	-0.92077	6.24222
kc05	951	590	1	Orth	rel	v2-2	D050	L1	28.38	3.34568	-0.188011	6.38012
kc05	954	709	1	ID	unrel	v2-2	D131	L1	3.51	1.25562	0.959336	6.56386
kc05	956	644	1	Orth	rel	v2-2	D051	L1	0.74	-0.301105	0.332634	6.4677
kc05	961	472	1	Morph	rel	v2-2	D023	L1	3.83	1.34286	-1.32572	6.15698
kc05	963	535	1	Sem	rel	v2-2	D085	L1	54.12	3.9912	-0.718297	6.28227
kc05	965	606	1	Morph	unrel	v2-2	D027	L1	24.93	3.21607	-0.0337455	6.40688
kc05	970	691	1	Sem	rel	v2-2	D078	L1	13.78	2.62322	0.785788	6.53814
kc05	971	602	1	Sem	unrel	v2-2	D076	L1	18.24	2.90362	-0.0723118	6.40026
kc05	975	527	1	Sem	unrel	v2-2	D094	L1	12.77	2.5471	-0.795429	6.2672
kc05	978	654	1	Orth	unrel	v2-2	D043	L1	2.64	0.970779	0.42905	6.48311
kc05	979	533	1	ID	rel	v2-2	D128	L1	153.99	5.03689	-0.73758	6.27852
kc05	983	546	1	Morph	unrel	v2-2	D022	L1	5.61	1.72455	-0.61224	6.30262
kc05	988	744	1	Morph	rel	v2-2	D007	L1	1.69	0.524729	1.29679	6.61204
kc05	989	534	1	Orth	unrel	v2-2	D069	L1	83.58	4.4258	-0.727938	6.2804
kc05	995	515	1	Orth	unrel	v2-2	D058	L1	15.14	2.71734	-0.911128	6.24417
kc05	999	512	1	ID	unrel	v2-2	D117	L1	2.36	0.858662	-0.940053	6.23832
kc05	1003	518	1	ID	rel	v2-2	D133	L1	11.01	2.3988	-0.882204	6.24998
kc05	1007	563	1	Orth	rel	v2-2	D055	L1	0.47	-0.755023	-0.448333	6.33328
kc05	1009	586	1	ID	rel	v2-2	D112	L1	19.05	2.94707	-0.226577	6.37332
kc05	1011	489	1	Sem	unrel	v2-2	D093	L1	11.49	2.44148	-1.16181	6.19236
kc05	1015	558	1	ID	unrel	v2-2	D140	L1	16.69	2.81481	-0.496541	6.32436
kc05	1017	533	1	Sem	unrel	v2-2	D090	L1	14.59	2.68034	-0.73758	6.27852
kc05	1024	641	1	Sem	rel	v2-2	D092	L1	20.07	2.99923	0.303709	6.46303
kc05	1025	512	1	Sem	unrel	v2-2	D079	L1	18.65	2.92585	-0.940053	6.23832
kc05	1029	533	1	Orth	rel	v2-2	D054	L1	70.34	4.25334	-0.73758	6.27852
kc05	1031	572	1	ID	unrel	v2-2	D136	L1	0.2	-1.60944	-0.361559	6.34914
kc05	1033	587	1	Morph	unrel	v2-2	D018	L1	7.57	2.02419	-0.216935	6.37502
kc05	1041	614	1	Morph	unrel	v2-2	D012	L1	58.78	4.0738	0.0433871	6.41999
kc05	1045	555	1	Morph	unrel	v2-2	D034	L1	18.65	2.92585	-0.525466	6.31897
kc05	1051	607	1	Morph	unrel	v2-2	D024	L1	13.45	2.59898	-0.0241039	6.40853
kc05	1060	666	1	Sem	rel	v2-2	D075	L1	11.89	2.4757	0.544749	6.50129
kc05	1061	585	1	Morph	rel	v2-2	D020	L1	29.19	3.37383	-0.236218	6.37161
kc05	1067	509	1	ID	unrel	v2-2	D111	L1	15.2	2.7213	-0.968978	6.23245
kc05	1075	624	1	Sem	rel	v2-2	D084	L1	19.19	2.95439	0.139803	6.43615
kc05	1079	622	1	Orth	unrel	v2-2	D066	L1	27.09	3.29916	0.12052	6.43294
kc05	1088	641	1	Sem	unrel	v2-2	D096	L1	41.15	3.71722	0.303709	6.46303
kc05	1090	671	1	Morph	unrel	v2-2	D025	L1	48.85	3.88875	0.592957	6.50877
kc05	1094	669	1	Sem	unrel	v2-2	D080	L1	149.26	5.00569	0.573673	6.50578
kc05	1095	620	1	ID	rel	v2-2	D119	L1	20	2.99573	0.101236	6.42972
kc05	1097	562	1	Sem	unrel	v2-2	D089	L1	60.81	4.10775	-0.457975	6.3315
kc05	1101	576	1	ID	rel	v2-2	D110	L1	2.91	1.06815	-0.322993	6.35611
kc05	1104	694	1	Orth	rel	v2-2	D059	L1	24.3	3.19048	0.814713	6.54247
kc05	1111	577	1	Morph	unrel	v2-2	D010	L1	17.03	2.83498	-0.313351	6.35784
kc05	1113	568	1	Morph	rel	v2-2	D036	L1	10.34	2.33602	-0.400125	6.34212
kc05	1123	626	1	Orth	unrel	v2-2	D042	L1	0.27	-1.30933	0.159086	6.43935
kc05	1129	582	1	Morph	unrel	v2-2	D003	L1	1.15	0.139762	-0.265143	6.36647
kc05	1132	669	1	Orth	unrel	v2-2	D049	L1	6.35	1.84845	0.573673	6.50578
kc05	1133	596	0	ID	unrel	v2-2	D130	L1	2.57	0.943906	-0.130161	6.39024
kc05	1138	633	1	ID	unrel	v2-2	D126	L1	168.78	5.1286	0.226577	6.45047
kc05	1141	551	1	Orth	unrel	v2-2	D045	L1	30.88	3.43011	-0.564032	6.31173
kc05	1143	517	1	Sem	unrel	v2-2	D081	L1	7.3	1.98787	-0.891845	6.24804
kc05	1148	675	1	Orth	unrel	v2-2	D044	L1	10.1	2.31254	0.631523	6.51471
kc05	1150	698	1	Orth	rel	v2-2	D072	L1	82.5	4.4128	0.853279	6.54822
kc05	1155	486	1	Morph	unrel	v2-2	D014	L1	19.66	2.97859	-1.19073	6.18621
kc05	1158	692	1	Morph	unrel	v2-2	D004	L1	4.8	1.56862	0.795429	6.53959
kc05	1159	507	1	Orth	unrel	v2-2	D047	L1	17.77	2.87751	-0.988261	6.22851
kc05	1166	767	1	Sem	unrel	v2-2	D105	L1	163.78	5.09852	1.51855	6.64249
kc05	1167	566	1	Orth	unrel	v2-2	D039	L1	12.64	2.53687	-0.419408	6.33859
kc05	1170	741	1	ID	unrel	v2-2	D137	L1	3.72	1.31372	1.26787	6.608
kc05	1173	477	1	Morph	rel	v2-2	D009	L1	6.08	1.805	-1.27751	6.16752
kc05	1175	596	1	ID	rel	v2-2	D129	L1	1.55	0.438255	-0.130161	6.39024
kc06	26	528	1	Orth	rel	v1-3	D037	L1	257.57	5.55129	-0.964948	6.2691
kc06	35	794	0	Orth	unrel	v1-3	D055	L1	0.47	-0.755023	0.585185	6.67708
kc06	41	727	1	Morph	rel	v1-3	D026	L1	38.99	3.66331	0.194738	6.58893
kc06	42	605	1	Morph	unrel	v1-3	D018	L1	7.57	2.02419	-0.516225	6.40523
kc06	47	659	1	Morph	unrel	v1-3	D013	L1	2.03	0.708036	-0.201537	6.49072
kc06	51	816	1	Morph	rel	v1-3	D021	L1	3.11	1.13462	0.713391	6.70441
kc06	59	707	1	Morph	unrel	v1-3	D033	L1	66.69	4.20006	0.0781865	6.56103
kc06	64	496	1	Sem	rel	v1-3	D104	L1	29.26	3.37622	-1.15143	6.20658
kc06	70	548	0	Orth	unrel	v1-3	D052	L1	0.07	-2.65926	-0.848396	6.30628
kc06	76	600	1	Morph	unrel	v1-3	D012	L1	58.78	4.0738	-0.545363	6.39693
kc06	78	623	1	ID	rel	v1-3	D111	L1	15.2	2.7213	-0.411329	6.43455
kc06	82	548	1	Orth	rel	v1-3	D048	L1	17.77	2.87751	-0.848396	6.30628
kc06	87	754	1	ID	unrel	v1-3	D131	L1	3.51	1.25562	0.352082	6.62539
kc06	88	552	1	Orth	rel	v1-3	D041	L1	29.8	3.39451	-0.825086	6.31355
kc06	90	567	1	Orth	rel	v1-3	D072	L1	82.5	4.4128	-0.737673	6.34036
kc06	99	706	1	Sem	unrel	v1-3	D106	L1	18.38	2.91126	0.0723589	6.55962
kc06	100	593	1	Orth	rel	v1-3	D069	L1	83.58	4.4258	-0.586156	6.38519
kc06	105	662	1	ID	unrel	v1-3	D140	L1	16.69	2.81481	-0.184054	6.49527
kc06	113	641	1	ID	unrel	v1-3	D112	L1	19.05	2.94707	-0.306433	6.46303
kc06	121	764	1	Orth	rel	v1-3	D057	L1	1.22	0.198851	0.410358	6.63857
kc06	123	1011	1	Orth	unrel	v1-3	D038	L1	0.273	-1.29828	1.84977	6.9187
kc06	124	562	1	Sem	rel	v1-3	D088	L1	2.03	0.708036	-0.766811	6.3315
kc06	133	1053	0	Morph	rel	v1-3	D007	L1	1.69	0.524729	2.09452	6.9594
kc06	134	611	1	Orth	unrel	v1-3	D068	L1	7.97	2.07568	-0.48126	6.4151
kc06	137	794	1	Orth	rel	v1-3	D062	L1	0.27	-1.30933	0.585185	6.67708
kc06	143	718	1	Sem	rel	v1-3	D105	L1	163.78	5.09852	0.14229	6.57647
kc06	151	745	1	Orth	rel	v1-3	D071	L1	0.68	-0.385662	0.299634	6.61338
kc06	153	664	1	Sem	rel	v1-3	D075	L1	11.89	2.4757	-0.172399	6.49828
kc06	159	652	1	ID	unrel	v1-3	D109	L1	55.14	4.00988	-0.24233	6.48004
kc06	160	603	1	Morph	unrel	v1-3	D020	L1	29.19	3.37383	-0.52788	6.40192
kc06	166	607	1	Sem	rel	v1-3	D094	L1	12.77	2.5471	-0.50457	6.40853
kc06	171	645	1	ID	unrel	v1-3	D121	L1	9.8	2.28238	-0.283123	6.46925
kc06	176	585	1	ID	rel	v1-3	D117	L1	2.36	0.858662	-0.632777	6.37161
kc06	178	552	1	ID	rel	v1-3	D135	L1	37.3	3.61899	-0.825086	6.31355
kc06	181	838	1	Orth	unrel	v1-3	D067	L1	18.45	2.91506	0.841598	6.73102
kc06	185	796	1	Morph	unrel	v1-3	D001	L1	28.51	3.35025	0.59684	6.6796
kc06	186	539	1	Morph	rel	v1-3	D031	L1	20.61	3.02578	-0.900845	6.28972
kc06	189	889	1	ID	unrel	v1-3	D137	L1	3.72	1.31372	1.1388	6.7901
kc06	193	639	1	ID	rel	v1-3	D119	L1	20	2.99573	-0.318088	6.4599
kc06	197	716	1	ID	unrel	v1-3	D141	L1	10.68	2.36837	0.130635	6.57368
kc06	198	587	1	Morph	rel	v1-3	D016	L1	178.04	5.18201	-0.621121	6.37502
kc06	203	633	1	ID	unrel	v1-3	D136	L1	0.2	-1.60944	-0.353053	6.45047
kc06	205	767	0	Sem	rel	v1-3	D077	L1	1.62	0.482426	0.42784	6.64249
kc06	206	622	1	Morph	unrel	v1-3	D019	L1	0.47	-0.755023	-0.417157	6.43294
kc06	211	636	1	Morph	unrel	v1-3	D014	L1	19.66	2.97859	-0.335571	6.4552
kc06	213	634	1	Sem	rel	v1-3	D081	L1	7.3	1.98787	-0.347226	6.45205
kc06	217	720	1	Morph	rel	v1-3	D036	L1	10.34	2.33602	0.153945	6.57925
kc06	219	646	1	Sem	unrel	v1-3	D076	L1	18.24	2.90362	-0.277295	6.4708
kc06	229	640	1	Sem	unrel	v1-3	D080	L1	149.26	5.00569	-0.31226	6.46147
kc06	234	596	1	ID	rel	v1-3	D110	L1	2.91	1.06815	-0.568673	6.39024
kc06	241	641	1	Morph	unrel	v1-3	D022	L1	5.61	1.72455	-0.306433	6.46303
kc06	243	695	1	Orth	rel	v1-3	D050	L1	28.38	3.34568	0.00825572	6.54391
kc06	247	789	1	Orth	rel	v1-3	D060	L1	10.41	2.34277	0.556047	6.67077
kc06	249	732	1	Morph	unrel	v1-3	D017	L1	27.36	3.30908	0.223876	6.59578
kc06	252	593	1	ID	rel	v1-3	D134	L1	12.91	2.558	-0.586156	6.38519
kc06	259	773	1	Orth	unrel	v1-3	D061	L1	17.03	2.83498	0.462806	6.65028
kc06	260	612	1	Sem	unrel	v1-3	D084	L1	19.19	2.95439	-0.475432	6.41673
kc06	263	723	1	ID	unrel	v1-3	D124	L1	1.62	0.482426	0.171428	6.58341
kc06	269	639	1	ID	unrel	v1-3	D139	L1	2.03	0.708036	-0.318088	6.4599
kc06	275	715	1	Morph	rel	v1-3	D002	L1	16.96	2.83086	0.124807	6.57228
kc06	276	594	1	Sem	unrel	v1-3	D078	L1	13.78	2.62322	-0.580328	6.38688
kc06	282	606	1	Orth	rel	v1-3	D054	L1	70.34	4.25334	-0.510398	6.40688
kc06	284	573	1	ID	rel	v1-3	D115	L1	13.18	2.5787	-0.702707	6.35089
kc06	293	768	1	Sem	rel	v1-3	D074	L1	9.26	2.2257	0.433668	6.64379
kc06	297	653	1	ID	rel	v1-3	D138	L1	19.59	2.97502	-0.236502	6.48158
kc06	303	810	1	Sem	unrel	v1-3	D082	L1	8.18	2.10169	0.678426	6.69703
kc06	305	680	0	Sem	rel	v1-3	D108	L1	1.76	0.565314	-0.0791578	6.52209
kc06	310	620	1	Morph	rel	v1-3	D034	L1	18.65	2.92585	-0.428812	6.42972
kc06	319	595	1	Sem	rel	v1-3	D092	L1	20.07	2.99923	-0.574501	6.38856
kc06	327	558	1	Morph	rel	v1-3	D029	L1	6.01	1.79342	-0.790121	6.32436
kc06	335	625	1	ID	unrel	v1-3	D127	L1	10.41	2.34277	-0.399674	6.43775
kc06	338	799	1	Morph	unrel	v1-3	D035	L1	8.58	2.14943	0.614323	6.68336
kc06	339	590	1	Orth	unrel	v1-3	D046	L1	0.61	-0.494296	-0.603639	6.38012
kc06	343	588	1	ID	unrel	v1-3	D114	L1	11.01	2.3988	-0.615294	6.37673
kc06	352	671	1	Orth	rel	v1-3	D042	L1	0.27	-1.30933	-0.131606	6.50877
kc06	355	620	0	Morph	rel	v1-3	D015	L1	11.82	2.46979	-0.428812	6.42972
kc06	357	587	1	Morph	rel	v1-3	D030	L1	4.66	1.53902	-0.621121	6.37502
kc06	362	664	0	Morph	rel	v1-3	D004	L1	4.8	1.56862	-0.172399	6.49828
kc06	366	646	1	Orth	unrel	v1-3	D044	L1	10.1	2.31254	-0.277295	6.4708
kc06	368	661	1	ID	unrel	v1-3	D122	L1	60.27	4.09883	-0.189882	6.49375
kc06	372	1082	1	ID	unrel	v1-3	D120	L1	10.14	2.31649	2.26352	6.98657
kc06	374	649	1	Sem	unrel	v1-3	D096	L1	41.15	3.71722	-0.259812	6.47543
kc06	376	663	1	ID	unrel	v1-3	D113	L1	9.32	2.23216	-0.178226	6.49677
kc06	384	626	1	Sem	rel	v1-3	D099	L1	34.66	3.54559	-0.393846	6.43935
kc06	390	823	1	ID	unrel	v1-3	D129	L1	1.55	0.438255	0.754184	6.71296
kc06	393	588	1	Sem	unrel	v1-3	D098	L1	8.72	2.16562	-0.615294	6.37673
kc06	398	650	1	Orth	unrel	v1-3	D070	L1	8.11	2.0931	-0.253985	6.47697
kc06	401	519	1	Sem	rel	v1-3	D083	L1	22.5	3.11352	-1.0174	6.2519
kc06	404	630	1	ID	rel	v1-3	D116	L1	21.62	3.07362	-0.370536	6.44572
kc06	405	484	1	ID	rel	v1-3	D132	L1	41.49	3.72545	-1.22136	6.18208
kc06	410	762	1	Morph	unrel	v1-3	D009	L1	6.08	1.805	0.398703	6.63595
kc06	411	625	1	Sem	unrel	v1-3	D079	L1	18.65	2.92585	-0.399674	6.43775
kc06	416	638	1	Sem	unrel	v1-3	D091	L1	15.41	2.73502	-0.323916	6.45834
kc06	424	849	1	Sem	unrel	v1-3	D103	L1	44.19	3.7885	0.905701	6.74406
kc06	428	671	1	Sem	rel	v1-3	D097	L1	43.85	3.78077	-0.131606	6.50877
kc06	430	765	1	Morph	unrel	v1-3	D032	L1	12.77	2.5471	0.416185	6.63988
kc06	436	1106	1	ID	unrel	v1-3	D144	L1	0.68	-0.385662	2.40339	7.00851
kc06	440	671	1	Morph	unrel	v1-3	D011	L1	1.22	0.198851	-0.131606	6.50877
kc06	444	1037	1	ID	unrel	v1-3	D123	L1	16.82	2.82257	2.00128	6.94409
kc06	450	633	1	ID	rel	v1-3	D125	L1	5.54	1.71199	-0.353053	6.45047
kc06	454	958	0	Orth	unrel	v1-3	D065	L1	0.14	-1.96611	1.54091	6.86485
kc06	455	597	1	Sem	unrel	v1-3	D102	L1	32.03	3.46667	-0.562846	6.39192
kc06	457	612	1	Sem	unrel	v1-3	D090	L1	14.59	2.68034	-0.475432	6.41673
kc06	464	1064	1	Sem	rel	v1-3	D093	L1	11.49	2.44148	2.15863	6.96979
kc06	468	733	1	Orth	unrel	v1-3	D056	L1	5.58	1.71919	0.229703	6.59715
kc06	470	788	1	Orth	unrel	v1-3	D039	L1	12.64	2.53687	0.550219	6.6695
kc06	471	611	1	Orth	unrel	v1-3	D047	L1	17.77	2.87751	-0.48126	6.4151
kc06	475	624	1	Morph	rel	v1-3	D024	L1	13.45	2.59898	-0.405501	6.43615
kc06	478	775	1	ID	unrel	v1-3	D118	L1	3.58	1.27536	0.474461	6.65286
kc06	484	659	1	Sem	rel	v1-3	D085	L1	54.12	3.9912	-0.201537	6.49072
kc06	485	586	1	Orth	rel	v1-3	D064	L1	164.12	5.1006	-0.626949	6.37332
kc06	490	711	1	Orth	unrel	v1-3	D041	L1	29.8	3.39451	0.101497	6.56667
kc06	491	542	1	ID	unrel	v1-3	D126	L1	168.78	5.1286	-0.883362	6.29527
kc06	499	617	1	Morph	rel	v1-3	D006	L1	40.47	3.70056	-0.446294	6.42487
kc06	501	560	1	Orth	unrel	v1-3	D069	L1	83.58	4.4258	-0.778466	6.32794
kc06	505	565	1	ID	rel	v1-3	D140	L1	16.69	2.81481	-0.749328	6.33683
kc06	512	730	1	Orth	unrel	v1-3	D066	L1	27.09	3.29916	0.212221	6.59304
kc06	513	536	1	Orth	unrel	v1-3	D048	L1	17.77	2.87751	-0.918327	6.28413
kc06	517	582	1	Morph	rel	v1-3	D012	L1	58.78	4.0738	-0.650259	6.36647
kc06	526	673	1	Sem	unrel	v1-3	D073	L1	16.76	2.819	-0.119951	6.51175
kc06	529	590	1	Morph	rel	v1-3	D027	L1	24.93	3.21607	-0.603639	6.38012
kc06	534	716	1	Morph	unrel	v1-3	D007	L1	1.69	0.524729	0.130635	6.57368
kc06	536	658	1	Orth	rel	v1-3	D068	L1	7.97	2.07568	-0.207364	6.4892
kc06	543	582	1	Sem	unrel	v1-3	D105	L1	163.78	5.09852	-0.650259	6.36647
kc06	550	674	0	Morph	unrel	v1-3	D005	L1	2.64	0.970779	-0.114123	6.51323
kc06	556	798	1	Orth	rel	v1-3	D059	L1	24.3	3.19048	0.608495	6.68211
kc06	558	932	1	Orth	unrel	v1-3	D058	L1	15.14	2.71734	1.38939	6.83733
kc06	559	571	1	ID	rel	v1-3	D112	L1	19.05	2.94707	-0.714362	6.34739
kc06	563	553	1	Morph	rel	v1-3	D020	L1	29.19	3.37383	-0.819259	6.31536
kc06	568	966	1	ID	unrel	v1-3	D130	L1	2.57	0.943906	1.58753	6.87316
kc06	571	508	1	ID	rel	v1-3	D121	L1	9.8	2.28238	-1.0815	6.23048
kc06	578	640	1	Morph	rel	v1-3	D023	L1	3.83	1.34286	-0.31226	6.46147
kc06	581	621	1	ID	unrel	v1-3	D135	L1	37.3	3.61899	-0.422984	6.43133
kc06	584	852	1	Orth	rel	v1-3	D067	L1	18.45	2.91506	0.923184	6.74759
kc06	587	610	1	ID	unrel	v1-3	D133	L1	11.01	2.3988	-0.487087	6.41346
kc06	590	784	0	Orth	unrel	v1-3	D043	L1	2.64	0.970779	0.526909	6.66441
kc06	591	559	1	Orth	unrel	v1-3	D071	L1	0.68	-0.385662	-0.784293	6.32615
kc06	596	772	1	ID	unrel	v1-3	D119	L1	20	2.99573	0.456978	6.64898
kc06	597	539	1	ID	rel	v1-3	D141	L1	10.68	2.36837	-0.900845	6.28972
kc06	605	700	1	ID	rel	v1-3	D136	L1	0.2	-1.60944	0.0373935	6.55108
kc06	607	762	1	Sem	unrel	v1-3	D077	L1	1.62	0.482426	0.398703	6.63595
kc06	617	764	1	Morph	rel	v1-3	D025	L1	48.85	3.88875	0.410358	6.63857
kc06	618	595	1	Orth	rel	v1-3	D053	L1	31.96	3.46449	-0.574501	6.38856
kc06	623	768	1	Sem	unrel	v1-3	D107	L1	3.45	1.23837	0.433668	6.64379
kc06	624	551	1	Morph	rel	v1-3	D010	L1	17.03	2.83498	-0.830914	6.31173
kc06	627	710	1	Morph	rel	v1-3	D001	L1	28.51	3.35025	0.0956692	6.56526
kc06	630	555	1	ID	rel	v1-3	D143	L1	50.54	3.92277	-0.807604	6.31897
kc06	633	1058	1	Sem	unrel	v1-3	D100	L1	185.61	5.22365	2.12366	6.96414
kc06	637	799	1	ID	unrel	v1-3	D110	L1	2.91	1.06815	0.614323	6.68336
kc06	643	860	1	Sem	unrel	v1-3	D089	L1	60.81	4.10775	0.969804	6.75693
kc06	646	585	1	Sem	unrel	v1-3	D095	L1	1.15	0.139762	-0.632777	6.37161
kc06	649	696	1	Orth	rel	v1-3	D045	L1	30.88	3.43011	0.0140833	6.54535
kc06	656	547	1	Sem	rel	v1-3	D106	L1	18.38	2.91126	-0.854224	6.30445
kc06	660	592	1	Morph	rel	v1-3	D014	L1	19.66	2.97859	-0.591984	6.38351
kc06	663	671	1	Sem	rel	v1-3	D084	L1	19.19	2.95439	-0.131606	6.50877
kc06	670	570	1	Sem	rel	v1-3	D087	L1	4.86	1.58104	-0.72019	6.34564
kc06	675	647	1	ID	unrel	v1-3	D128	L1	153.99	5.03689	-0.271467	6.47235
kc06	677	782	1	Morph	unrel	v1-3	D002	L1	16.96	2.83086	0.515254	6.66185
kc06	680	604	1	Sem	rel	v1-3	D076	L1	18.24	2.90362	-0.522053	6.40357
kc06	687	808	1	Morph	unrel	v1-3	D003	L1	1.15	0.139762	0.666771	6.69456
kc06	692	572	1	Sem	unrel	v1-3	D104	L1	29.26	3.37622	-0.708535	6.34914
kc06	695	627	1	Sem	rel	v1-3	D078	L1	13.78	2.62322	-0.388019	6.44095
kc06	699	888	1	Orth	unrel	v1-3	D040	L1	2.77	1.01885	1.13298	6.78897
kc06	705	636	1	ID	rel	v1-3	D109	L1	55.14	4.00988	-0.335571	6.4552
kc06	707	707	1	Sem	unrel	v1-3	D108	L1	1.76	0.565314	0.0781865	6.56103
kc06	721	994	1	Sem	unrel	v1-3	D092	L1	20.07	2.99923	1.7507	6.90174
kc06	725	664	1	Morph	unrel	v1-3	D036	L1	10.34	2.33602	-0.172399	6.49828
kc06	731	764	1	Morph	unrel	v1-3	D029	L1	6.01	1.79342	0.410358	6.63857
kc06	739	639	1	Morph	unrel	v1-3	D008	L1	24.86	3.21326	-0.318088	6.4599
kc06	741	726	1	Sem	rel	v1-3	D082	L1	8.18	2.10169	0.18891	6.58755
kc06	745	811	1	ID	rel	v1-3	D114	L1	11.01	2.3988	0.684253	6.69827
kc06	748	545	1	Morph	rel	v1-3	D028	L1	41.82	3.73337	-0.865879	6.30079
kc06	751	975	0	Orth	unrel	v1-3	D063	L1	0.07	-2.65926	1.63997	6.88244
kc06	753	718	1	Orth	unrel	v1-3	D042	L1	0.27	-1.30933	0.14229	6.57647
kc06	757	796	1	Morph	unrel	v1-3	D015	L1	11.82	2.46979	0.59684	6.6796
kc06	763	632	1	Sem	rel	v1-3	D101	L1	79.05	4.37008	-0.358881	6.44889
kc06	766	613	1	Orth	rel	v1-3	D044	L1	10.1	2.31254	-0.469605	6.41836
kc06	768	620	1	Sem	unrel	v1-3	D088	L1	2.03	0.708036	-0.428812	6.42972
kc06	775	632	1	Sem	rel	v1-3	D096	L1	41.15	3.71722	-0.358881	6.44889
kc06	776	583	1	ID	rel	v1-3	D113	L1	9.32	2.23216	-0.644432	6.36819
kc06	781	924	1	Morph	unrel	v1-3	D030	L1	4.66	1.53902	1.34277	6.82871
kc06	783	651	1	Orth	unrel	v1-3	D057	L1	1.22	0.198851	-0.248157	6.47851
kc06	785	674	1	Sem	unrel	v1-3	D099	L1	34.66	3.54559	-0.114123	6.51323
kc06	791	686	1	ID	rel	v1-3	D129	L1	1.55	0.438255	-0.0441924	6.53088
kc06	794	620	1	Sem	rel	v1-3	D098	L1	8.72	2.16562	-0.428812	6.42972
kc06	798	577	1	Orth	rel	v1-3	D070	L1	8.11	2.0931	-0.679397	6.35784
kc06	800	592	1	Sem	unrel	v1-3	D094	L1	12.77	2.5471	-0.591984	6.38351
kc06	803	886	1	Sem	unrel	v1-3	D083	L1	22.5	3.11352	1.12132	6.78672
kc06	809	715	1	Morph	unrel	v1-3	D021	L1	3.11	1.13462	0.124807	6.57228
kc06	810	594	1	Morph	rel	v1-3	D009	L1	6.08	1.805	-0.580328	6.38688
kc06	816	606	1	Morph	unrel	v1-3	D034	L1	18.65	2.92585	-0.510398	6.40688
kc06	819	644	1	Morph	rel	v1-3	D013	L1	2.03	0.708036	-0.28895	6.4677
kc06	825	656	1	ID	unrel	v1-3	D116	L1	21.62	3.07362	-0.219019	6.48616
kc06	827	807	1	Orth	rel	v1-3	D046	L1	0.61	-0.494296	0.660943	6.69332
kc06	828	526	0	Sem	unrel	v1-3	D097	L1	43.85	3.78077	-0.976603	6.2653
kc06	832	596	1	Morph	rel	v1-3	D032	L1	12.77	2.5471	-0.568673	6.39024
kc06	834	562	1	ID	rel	v1-3	D137	L1	3.72	1.31372	-0.766811	6.3315
kc06	836	569	1	ID	rel	v1-3	D144	L1	0.68	-0.385662	-0.726018	6.34388
kc06	845	652	1	Orth	unrel	v1-3	D060	L1	10.41	2.34277	-0.24233	6.48004
kc06	846	603	1	Morph	rel	v1-3	D018	L1	7.57	2.02419	-0.52788	6.40192
kc06	851	776	1	ID	unrel	v1-3	D125	L1	5.54	1.71199	0.480289	6.65415
kc06	852	559	1	Sem	rel	v1-3	D103	L1	44.19	3.7885	-0.784293	6.32615
kc06	856	612	1	Sem	rel	v1-3	D102	L1	32.03	3.46667	-0.475432	6.41673
kc06	865	663	1	ID	rel	v1-3	D120	L1	10.14	2.31649	-0.178226	6.49677
kc06	877	664	1	Orth	unrel	v1-3	D037	L1	257.57	5.55129	-0.172399	6.49828
kc06	878	591	1	ID	rel	v1-3	D118	L1	3.58	1.27536	-0.597811	6.38182
kc06	885	659	1	Sem	unrel	v1-3	D085	L1	54.12	3.9912	-0.201537	6.49072
kc06	887	705	1	Orth	unrel	v1-3	D064	L1	164.12	5.1006	0.0665314	6.5582
kc06	892	714	1	ID	unrel	v1-3	D115	L1	13.18	2.5787	0.118979	6.57088
kc06	893	552	1	Sem	rel	v1-3	D080	L1	149.26	5.00569	-0.825086	6.31355
kc06	901	603	1	Morph	unrel	v1-3	D006	L1	40.47	3.70056	-0.52788	6.40192
kc06	908	816	0	Orth	rel	v1-3	D055	L1	0.47	-0.755023	0.713391	6.70441
kc06	915	483	1	ID	rel	v1-3	D124	L1	1.62	0.482426	-1.22719	6.18002
kc06	921	583	1	ID	unrel	v1-3	D117	L1	2.36	0.858662	-0.644432	6.36819
kc06	925	620	0	Orth	unrel	v1-3	D062	L1	0.27	-1.30933	-0.428812	6.42972
kc06	929	602	1	Morph	unrel	v1-3	D016	L1	178.04	5.18201	-0.533708	6.40026
kc06	932	696	1	Morph	unrel	v1-3	D027	L1	24.93	3.21607	0.0140833	6.54535
kc06	936	702	1	Morph	rel	v1-3	D035	L1	8.58	2.14943	0.0490487	6.55393
kc06	937	597	1	ID	unrel	v1-3	D138	L1	19.59	2.97502	-0.562846	6.39192
kc06	945	592	1	Orth	unrel	v1-3	D054	L1	70.34	4.25334	-0.591984	6.38351
kc06	948	750	1	Sem	unrel	v1-3	D074	L1	9.26	2.2257	0.328772	6.62007
kc06	951	556	0	Morph	rel	v1-3	D005	L1	2.64	0.970779	-0.801776	6.32077
kc06	955	521	1	Orth	rel	v1-3	D056	L1	5.58	1.71919	-1.00574	6.25575
kc06	957	616	1	Orth	unrel	v1-3	D059	L1	24.3	3.19048	-0.452122	6.42325
kc06	963	580	1	Orth	rel	v1-3	D066	L1	27.09	3.29916	-0.661914	6.36303
kc06	965	507	1	ID	rel	v1-3	D127	L1	10.41	2.34277	-1.08733	6.22851
kc06	970	856	1	ID	rel	v1-3	D130	L1	2.57	0.943906	0.946494	6.75227
kc06	974	958	1	ID	rel	v1-3	D131	L1	3.51	1.25562	1.54091	6.86485
kc06	976	629	1	Orth	unrel	v1-3	D072	L1	82.5	4.4128	-0.376364	6.44413
kc06	979	602	1	Morph	unrel	v1-3	D023	L1	3.83	1.34286	-0.533708	6.40026
kc06	988	725	1	Morph	unrel	v1-3	D031	L1	20.61	3.02578	0.183083	6.58617
kc06	993	569	1	ID	rel	v1-3	D133	L1	11.01	2.3988	-0.726018	6.34388
kc06	1001	620	1	ID	unrel	v1-3	D111	L1	15.2	2.7213	-0.428812	6.42972
kc06	1008	632	1	Morph	rel	v1-3	D011	L1	1.22	0.198851	-0.358881	6.44889
kc06	1013	589	1	Sem	unrel	v1-3	D086	L1	24.19	3.18594	-0.609466	6.37843
kc06	1017	594	1	Morph	unrel	v1-3	D025	L1	48.85	3.88875	-0.580328	6.38688
kc06	1019	537	1	Orth	unrel	v1-3	D053	L1	31.96	3.46449	-0.9125	6.286
kc06	1024	670	1	Sem	rel	v1-3	D107	L1	3.45	1.23837	-0.137433	6.50728
kc06	1025	565	1	Morph	unrel	v1-3	D024	L1	13.45	2.59898	-0.749328	6.33683
kc06	1029	595	1	ID	rel	v1-3	D123	L1	16.82	2.82257	-0.574501	6.38856
kc06	1038	758	1	Morph	unrel	v1-3	D004	L1	4.8	1.56862	0.375392	6.63068
kc06	1039	564	1	Sem	rel	v1-3	D079	L1	18.65	2.92585	-0.755155	6.33505
kc06	1043	594	1	Morph	rel	v1-3	D017	L1	27.36	3.30908	-0.580328	6.38688
kc06	1049	558	1	Orth	unrel	v1-3	D045	L1	30.88	3.43011	-0.790121	6.32436
kc06	1051	597	1	Orth	unrel	v1-3	D049	L1	6.35	1.84845	-0.562846	6.39192
kc06	1059	600	1	ID	unrel	v1-3	D132	L1	41.49	3.72545	-0.545363	6.39693
kc06	1063	605	1	Sem	rel	v1-3	D091	L1	15.41	2.73502	-0.516225	6.40523
kc06	1070	665	1	Morph	rel	v1-3	D033	L1	66.69	4.20006	-0.166571	6.49979
kc06	1071	608	1	ID	unrel	v1-3	D143	L1	50.54	3.92277	-0.498743	6.41017
kc06	1073	559	1	Morph	unrel	v1-3	D026	L1	38.99	3.66331	-0.784293	6.32615
kc06	1079	531	1	ID	rel	v1-3	D128	L1	153.99	5.03689	-0.947465	6.27476
kc06	1085	615	1	Orth	unrel	v1-3	D050	L1	28.38	3.34568	-0.45795	6.42162
kc06	1090	917	1	Sem	unrel	v1-3	D075	L1	11.89	2.4757	1.30198	6.82111
kc06	1093	610	1	ID	rel	v1-3	D122	L1	60.27	4.09883	-0.487087	6.41346
kc06	1096	689	1	Morph	rel	v1-3	D022	L1	5.61	1.72455	-0.0267097	6.53524
kc06	1097	512	1	Morph	rel	v1-3	D003	L1	1.15	0.139762	-1.05819	6.23832
kc06	1102	653	1	ID	unrel	v1-3	D134	L1	12.91	2.558	-0.236502	6.48158
kc06	1103	583	1	Orth	rel	v1-3	D061	L1	17.03	2.83498	-0.644432	6.36819
kc06	1108	672	1	Orth	rel	v1-3	D040	L1	2.77	1.01885	-0.125778	6.51026
kc06	1110	747	1	Morph	rel	v1-3	D019	L1	0.47	-0.755023	0.311289	6.61607
kc06	1115	532	1	Sem	rel	v1-3	D073	L1	16.76	2.819	-0.941638	6.27664
kc06	1119	570	1	ID	rel	v1-3	D126	L1	168.78	5.1286	-0.72019	6.34564
kc06	1126	777	1	Sem	unrel	v1-3	D087	L1	4.86	1.58104	0.486116	6.65544
kc06	1130	670	1	ID	rel	v1-3	D142	L1	38.24	3.64388	-0.137433	6.50728
kc06	1131	541	1	Sem	rel	v1-3	D100	L1	185.61	5.22365	-0.889189	6.29342
kc06	1133	612	1	Sem	rel	v1-3	D089	L1	60.81	4.10775	-0.475432	6.41673
kc06	1141	495	1	Morph	rel	v1-3	D008	L1	24.86	3.21326	-1.15726	6.20456
kc06	1147	571	0	Orth	unrel	v1-3	D051	L1	0.74	-0.301105	-0.714362	6.34739
kc06	1149	554	1	Morph	unrel	v1-3	D028	L1	41.82	3.73337	-0.813431	6.31716
kc06	1152	776	0	Orth	rel	v1-3	D063	L1	0.07	-2.65926	0.480289	6.65415
kc06	1155	534	1	Orth	rel	v1-3	D047	L1	17.77	2.87751	-0.929982	6.2804
kc06	1164	905	1	Orth	rel	v1-3	D039	L1	12.64	2.53687	1.23204	6.80793
kc06	1166	695	1	Sem	unrel	v1-3	D101	L1	79.05	4.37008	0.00825572	6.54391
kc06	1168	790	0	Orth	rel	v1-3	D065	L1	0.14	-1.96611	0.561874	6.67203
kc06	1171	572	1	Sem	rel	v1-3	D090	L1	14.59	2.68034	-0.708535	6.34914
kc06	1174	698	1	Orth	rel	v1-3	D043	L1	2.64	0.970779	0.0257384	6.54822
kc06	1178	816	1	Sem	unrel	v1-3	D093	L1	11.49	2.44148	0.713391	6.70441
kc07	25	718	1	Orth	rel	v2-3	D066	L1	27.09	3.29916	1.44222	6.57647
kc07	33	649	1	ID	unrel	v2-3	D124	L1	1.62	0.482426	0.863153	6.47543
kc07	39	741	1	Orth	unrel	v2-3	D055	L1	0.47	-0.755023	1.63524	6.608
kc07	41	668	1	Orth	unrel	v2-3	D049	L1	6.35	1.84845	1.02261	6.50429
kc07	47	792	1	Orth	rel	v2-3	D038	L1	0.273	-1.29828	2.06325	6.67456
kc07	49	759	1	Morph	rel	v2-3	D028	L1	41.82	3.73337	1.7863	6.632
kc07	53	748	1	ID	rel	v2-3	D118	L1	3.58	1.27536	1.69399	6.6174
kc07	56	578	1	ID	rel	v2-3	D133	L1	11.01	2.3988	0.2673	6.35957
kc07	61	663	1	ID	unrel	v2-3	D122	L1	60.27	4.09883	0.980645	6.49677
kc07	65	773	1	Sem	unrel	v2-3	D103	L1	44.19	3.7885	1.9038	6.65028
kc07	68	498	1	ID	rel	v2-3	D111	L1	15.2	2.7213	-0.404083	6.2106
kc07	70	449	1	Orth	rel	v2-3	D043	L1	2.64	0.970779	-0.815305	6.10702
kc07	76	485	1	Orth	rel	v2-3	D071	L1	0.68	-0.385662	-0.513183	6.18415
kc07	80	571	1	Orth	unrel	v2-3	D061	L1	17.03	2.83498	0.208554	6.34739
kc07	85	688	1	Morph	rel	v2-3	D004	L1	4.8	1.56862	1.19045	6.53379
kc07	86	543	1	Morph	unrel	v2-3	D021	L1	3.11	1.13462	-0.0264299	6.29711
kc07	88	446	1	Sem	unrel	v2-3	D105	L1	163.78	5.09852	-0.840482	6.10032
kc07	92	459	1	Morph	unrel	v2-3	D013	L1	2.03	0.708036	-0.731382	6.12905
kc07	100	566	1	Orth	unrel	v2-3	D070	L1	8.11	2.0931	0.166593	6.33859
kc07	102	469	1	Morph	rel	v2-3	D014	L1	19.66	2.97859	-0.647459	6.1506
kc07	108	601	1	Morph	unrel	v2-3	D036	L1	10.34	2.33602	0.460323	6.39859
kc07	113	646	1	Orth	unrel	v2-3	D068	L1	7.97	2.07568	0.837976	6.4708
kc07	115	677	1	Morph	rel	v2-3	D025	L1	48.85	3.88875	1.09814	6.51767
kc07	116	492	1	Sem	unrel	v2-3	D081	L1	7.3	1.98787	-0.454437	6.19848
kc07	120	553	0	Orth	rel	v2-3	D065	L1	0.14	-1.96611	0.057493	6.31536
kc07	126	598	1	Sem	rel	v2-3	D090	L1	14.59	2.68034	0.435146	6.39359
kc07	131	707	1	Orth	unrel	v2-3	D051	L1	0.74	-0.301105	1.34991	6.56103
kc07	134	593	1	ID	rel	v2-3	D134	L1	12.91	2.558	0.393185	6.38519
kc07	136	479	1	Sem	rel	v2-3	D082	L1	8.18	2.10169	-0.563536	6.1717
kc07	144	522	1	Orth	unrel	v2-3	D040	L1	2.77	1.01885	-0.202668	6.25767
kc07	150	543	1	Orth	unrel	v2-3	D054	L1	70.34	4.25334	-0.0264299	6.29711
kc07	152	525	1	Sem	unrel	v2-3	D080	L1	149.26	5.00569	-0.177491	6.2634
kc07	155	828	1	Orth	unrel	v2-3	D044	L1	10.1	2.31254	2.36537	6.71901
kc07	158	482	1	Morph	unrel	v2-3	D015	L1	11.82	2.46979	-0.53836	6.17794
kc07	160	464	1	Morph	unrel	v2-3	D008	L1	24.86	3.21326	-0.689421	6.13988
kc07	162	535	1	ID	unrel	v2-3	D116	L1	21.62	3.07362	-0.0935682	6.28227
kc07	166	588	1	ID	unrel	v2-3	D113	L1	9.32	2.23216	0.351223	6.37673
kc07	175	647	1	Sem	rel	v2-3	D083	L1	22.5	3.11352	0.846368	6.47235
kc07	178	525	1	Sem	rel	v2-3	D086	L1	24.19	3.18594	-0.177491	6.2634
kc07	180	540	1	Sem	unrel	v2-3	D088	L1	2.03	0.708036	-0.0516068	6.29157
kc07	183	666	1	Sem	rel	v2-3	D097	L1	43.85	3.78077	1.00582	6.50129
kc07	189	807	1	ID	unrel	v2-3	D127	L1	10.41	2.34277	2.18913	6.69332
kc07	192	508	1	Orth	unrel	v2-3	D053	L1	31.96	3.46449	-0.32016	6.23048
kc07	196	498	1	ID	rel	v2-3	D109	L1	55.14	4.00988	-0.404083	6.2106
kc07	198	520	1	Orth	rel	v2-3	D045	L1	30.88	3.43011	-0.219453	6.25383
kc07	204	500	1	Morph	unrel	v2-3	D011	L1	1.22	0.198851	-0.387298	6.21461
kc07	212	399	1	ID	rel	v2-3	D141	L1	10.68	2.36837	-1.23492	5.98896
kc07	220	570	1	Sem	unrel	v2-3	D093	L1	11.49	2.44148	0.200162	6.34564
kc07	226	527	1	ID	rel	v2-3	D115	L1	13.18	2.5787	-0.160707	6.2672
kc07	228	453	1	ID	unrel	v2-3	D121	L1	9.8	2.28238	-0.781736	6.11589
kc07	232	491	1	Orth	unrel	v2-3	D047	L1	17.77	2.87751	-0.462829	6.19644
kc07	234	434	1	Morph	rel	v2-3	D016	L1	178.04	5.18201	-0.94119	6.07304
kc07	238	591	1	Morph	unrel	v2-3	D019	L1	0.47	-0.755023	0.3764	6.38182
kc07	240	494	1	Orth	unrel	v2-3	D060	L1	10.41	2.34277	-0.437652	6.20254
kc07	242	420	1	Orth	unrel	v2-3	D064	L1	164.12	5.1006	-1.05868	6.04025
kc07	247	794	1	ID	rel	v2-3	D114	L1	11.01	2.3988	2.08004	6.67708
kc07	249	689	1	Sem	unrel	v2-3	D076	L1	18.24	2.90362	1.19884	6.53524
kc07	254	525	1	Sem	unrel	v2-3	D078	L1	13.78	2.62322	-0.177491	6.2634
kc07	257	820	1	Morph	unrel	v2-3	D035	L1	8.58	2.14943	2.29823	6.7093
kc07	264	559	1	Sem	unrel	v2-3	D101	L1	79.05	4.37008	0.107847	6.32615
kc07	266	613	1	Morph	unrel	v2-3	D017	L1	27.36	3.30908	0.56103	6.41836
kc07	270	515	1	Morph	unrel	v2-3	D002	L1	16.96	2.83086	-0.261414	6.24417
kc07	272	522	1	ID	unrel	v2-3	D120	L1	10.14	2.31649	-0.202668	6.25767
kc07	274	624	1	ID	unrel	v2-3	D135	L1	37.3	3.61899	0.653346	6.43615
kc07	284	490	1	ID	unrel	v2-3	D144	L1	0.68	-0.385662	-0.471221	6.19441
kc07	286	529	1	Sem	unrel	v2-3	D094	L1	12.77	2.5471	-0.143922	6.27099
kc07	295	644	1	Sem	rel	v2-3	D106	L1	18.38	2.91126	0.821191	6.4677
kc07	302	550	1	Sem	unrel	v2-3	D104	L1	29.26	3.37622	0.0323161	6.30992
kc07	310	498	1	Morph	rel	v2-3	D026	L1	38.99	3.66331	-0.404083	6.2106
kc07	317	474	1	ID	rel	v2-3	D143	L1	50.54	3.92277	-0.605498	6.16121
kc07	319	465	1	Morph	unrel	v2-3	D012	L1	58.78	4.0738	-0.681029	6.14204
kc07	321	432	1	Orth	rel	v2-3	D059	L1	24.3	3.19048	-0.957974	6.06843
kc07	325	493	1	ID	unrel	v2-3	D117	L1	2.36	0.858662	-0.446044	6.20051
kc07	327	404	1	ID	rel	v2-3	D123	L1	16.82	2.82257	-1.19296	6.00141
kc07	329	539	1	ID	unrel	v2-3	D119	L1	20	2.99573	-0.0599991	6.28972
kc07	336	655	1	Morph	unrel	v2-3	D001	L1	28.51	3.35025	0.913507	6.48464
kc07	339	476	1	Sem	unrel	v2-3	D102	L1	32.03	3.46667	-0.588713	6.16542
kc07	341	475	1	Morph	unrel	v2-3	D007	L1	1.69	0.524729	-0.597106	6.16331
kc07	347	496	1	ID	unrel	v2-3	D131	L1	3.51	1.25562	-0.420868	6.20658
kc07	349	444	1	Sem	unrel	v2-3	D085	L1	54.12	3.9912	-0.857267	6.09582
kc07	356	626	1	Orth	unrel	v2-3	D057	L1	1.22	0.198851	0.67013	6.43935
kc07	359	453	1	ID	rel	v2-3	D132	L1	41.49	3.72545	-0.781736	6.11589
kc07	367	480	1	Orth	rel	v2-3	D067	L1	18.45	2.91506	-0.555144	6.17379
kc07	369	519	1	Sem	rel	v2-3	D092	L1	20.07	2.99923	-0.227845	6.2519
kc07	371	542	1	Sem	rel	v2-3	D079	L1	18.65	2.92585	-0.0348222	6.29527
kc07	377	602	1	Morph	rel	v2-3	D024	L1	13.45	2.59898	0.468715	6.40026
kc07	383	558	1	Morph	unrel	v2-3	D006	L1	40.47	3.70056	0.0994545	6.32436
kc07	387	468	1	Morph	unrel	v2-3	D033	L1	66.69	4.20006	-0.655852	6.14847
kc07	391	465	1	Sem	rel	v2-3	D077	L1	1.62	0.482426	-0.681029	6.14204
kc07	400	764	1	Sem	rel	v2-3	D100	L1	185.61	5.22365	1.82827	6.63857
kc07	403	506	1	ID	rel	v2-3	D130	L1	2.57	0.943906	-0.336945	6.22654
kc07	407	615	1	Morph	unrel	v2-3	D023	L1	3.83	1.34286	0.577815	6.42162
kc07	409	470	0	ID	unrel	v2-3	D125	L1	5.54	1.71199	-0.639067	6.15273
kc07	417	545	1	Sem	unrel	v2-3	D075	L1	11.89	2.4757	-0.00964531	6.30079
kc07	423	605	1	Sem	rel	v2-3	D108	L1	1.76	0.565314	0.493892	6.40523
kc07	430	777	1	ID	rel	v2-3	D129	L1	1.55	0.438255	1.93737	6.65544
kc07	432	720	0	Orth	rel	v2-3	D052	L1	0.07	-2.65926	1.45901	6.57925
kc07	433	543	1	Orth	rel	v2-3	D039	L1	12.64	2.53687	-0.0264299	6.29711
kc07	441	562	1	Morph	unrel	v2-3	D003	L1	1.15	0.139762	0.133024	6.3315
kc07	445	519	1	Orth	unrel	v2-3	D048	L1	17.77	2.87751	-0.227845	6.2519
kc07	447	518	1	Morph	unrel	v2-3	D034	L1	18.65	2.92585	-0.236237	6.24998
kc07	449	460	1	Morph	rel	v2-3	D031	L1	20.61	3.02578	-0.72299	6.13123
kc07	455	553	1	ID	unrel	v2-3	D137	L1	3.72	1.31372	0.057493	6.31536
kc07	457	496	1	Morph	rel	v2-3	D020	L1	29.19	3.37383	-0.420868	6.20658
kc07	460	678	1	Orth	rel	v2-3	D063	L1	0.07	-2.65926	1.10653	6.51915
kc07	463	524	1	Sem	rel	v2-3	D098	L1	8.72	2.16562	-0.185883	6.26149
kc07	465	530	1	Sem	unrel	v2-3	D074	L1	9.26	2.2257	-0.13553	6.27288
kc07	469	584	1	Orth	rel	v2-3	D058	L1	15.14	2.71734	0.317654	6.3699
kc07	474	725	1	ID	rel	v2-3	D110	L1	2.91	1.06815	1.50097	6.58617
kc07	481	416	1	ID	unrel	v2-3	D128	L1	153.99	5.03689	-1.09225	6.03069
kc07	483	479	1	ID	unrel	v2-3	D138	L1	19.59	2.97502	-0.563536	6.1717
kc07	485	422	1	ID	rel	v2-3	D112	L1	19.05	2.94707	-1.0419	6.04501
kc07	489	411	1	Morph	rel	v2-3	D009	L1	6.08	1.805	-1.13421	6.01859
kc07	493	513	1	Morph	rel	v2-3	D029	L1	6.01	1.79342	-0.278199	6.24028
kc07	495	559	0	Sem	unrel	v2-3	D095	L1	1.15	0.139762	0.107847	6.32615
kc07	497	470	1	Morph	unrel	v2-3	D027	L1	24.93	3.21607	-0.639067	6.15273
kc07	501	404	1	Sem	unrel	v2-3	D099	L1	34.66	3.54559	-1.19296	6.00141
kc07	507	456	1	ID	unrel	v2-3	D142	L1	38.24	3.64388	-0.756559	6.12249
kc07	509	591	1	Sem	rel	v2-3	D096	L1	41.15	3.71722	0.3764	6.38182
kc07	513	500	1	ID	unrel	v2-3	D140	L1	16.69	2.81481	-0.387298	6.21461
kc07	515	595	1	Orth	rel	v2-3	D037	L1	257.57	5.55129	0.409969	6.38856
kc07	517	530	1	Sem	rel	v2-3	D081	L1	7.3	1.98787	-0.13553	6.27288
kc07	521	503	1	Orth	unrel	v2-3	D065	L1	0.14	-1.96611	-0.362122	6.22059
kc07	529	530	1	Sem	unrel	v2-3	D090	L1	14.59	2.68034	-0.13553	6.27288
kc07	535	614	1	Sem	rel	v2-3	D089	L1	60.81	4.10775	0.569423	6.41999
kc07	544	705	1	Orth	rel	v2-3	D072	L1	82.5	4.4128	1.33312	6.5582
kc07	545	528	0	Orth	rel	v2-3	D068	L1	7.97	2.07568	-0.152314	6.2691
kc07	553	515	1	Sem	rel	v2-3	D080	L1	149.26	5.00569	-0.261414	6.24417
kc07	555	618	1	Orth	rel	v2-3	D044	L1	10.1	2.31254	0.602992	6.42649
kc07	557	552	1	Sem	unrel	v2-3	D084	L1	19.19	2.95439	0.0491007	6.31355
kc07	561	486	1	Morph	unrel	v2-3	D030	L1	4.66	1.53902	-0.50479	6.18621
kc07	569	425	1	Orth	unrel	v2-3	D062	L1	0.27	-1.30933	-1.01672	6.05209
kc07	571	464	1	Sem	unrel	v2-3	D073	L1	16.76	2.819	-0.689421	6.13988
kc07	575	493	1	Morph	unrel	v2-3	D025	L1	48.85	3.88875	-0.446044	6.20051
kc07	579	466	1	Sem	unrel	v2-3	D086	L1	24.19	3.18594	-0.672636	6.14419
kc07	581	417	1	Sem	rel	v2-3	D088	L1	2.03	0.708036	-1.08386	6.03309
kc07	583	496	1	Sem	unrel	v2-3	D097	L1	43.85	3.78077	-0.420868	6.20658
kc07	589	412	1	ID	rel	v2-3	D127	L1	10.41	2.34277	-1.12582	6.02102
kc07	591	411	1	Morph	rel	v2-3	D018	L1	7.57	2.02419	-1.13421	6.01859
kc07	595	536	1	Orth	unrel	v2-3	D041	L1	29.8	3.39451	-0.0851759	6.28413
kc07	597	487	1	Sem	unrel	v2-3	D087	L1	4.86	1.58104	-0.496398	6.18826
kc07	599	414	1	Orth	unrel	v2-3	D045	L1	30.88	3.43011	-1.10904	6.02587
kc07	606	473	0	Orth	rel	v2-3	D040	L1	2.77	1.01885	-0.61389	6.1591
kc07	614	468	1	ID	unrel	v2-3	D141	L1	10.68	2.36837	-0.655852	6.14847
kc07	622	567	1	Sem	rel	v2-3	D093	L1	11.49	2.44148	0.174985	6.34036
kc07	630	450	1	ID	rel	v2-3	D121	L1	9.8	2.28238	-0.806913	6.10925
kc07	633	825	1	ID	unrel	v2-3	D139	L1	2.03	0.708036	2.3402	6.71538
kc07	634	487	1	Orth	rel	v2-3	D047	L1	17.77	2.87751	-0.496398	6.18826
kc07	638	581	1	ID	unrel	v2-3	D115	L1	13.18	2.5787	0.292477	6.36475
kc07	640	452	1	Morph	rel	v2-3	D019	L1	0.47	-0.755023	-0.790128	6.11368
kc07	642	450	1	Morph	unrel	v2-3	D016	L1	178.04	5.18201	-0.806913	6.10925
kc07	648	598	1	ID	unrel	v2-3	D114	L1	11.01	2.3988	0.435146	6.39359
kc07	650	533	1	Morph	unrel	v2-3	D022	L1	5.61	1.72455	-0.110353	6.27852
kc07	654	467	1	Orth	unrel	v2-3	D046	L1	0.61	-0.494296	-0.664244	6.14633
kc07	656	545	1	Orth	rel	v2-3	D064	L1	164.12	5.1006	-0.00964531	6.30079
kc07	664	500	1	Sem	rel	v2-3	D076	L1	18.24	2.90362	-0.387298	6.21461
kc07	672	463	1	Morph	rel	v2-3	D002	L1	16.96	2.83086	-0.697813	6.13773
kc07	675	838	1	ID	rel	v2-3	D120	L1	10.14	2.31649	2.4493	6.73102
kc07	676	469	1	ID	rel	v2-3	D135	L1	37.3	3.61899	-0.647459	6.1506
kc07	684	592	1	Orth	unrel	v2-3	D056	L1	5.58	1.71919	0.384792	6.38351
kc07	688	541	1	Sem	rel	v2-3	D094	L1	12.77	2.5471	-0.0432145	6.29342
kc07	696	568	1	Orth	rel	v2-3	D054	L1	70.34	4.25334	0.183377	6.34212
kc07	704	483	1	Sem	rel	v2-3	D104	L1	29.26	3.37622	-0.529967	6.18002
kc07	712	622	1	Orth	rel	v2-3	D042	L1	0.27	-1.30933	0.636561	6.43294
kc07	714	541	1	Morph	unrel	v2-3	D026	L1	38.99	3.66331	-0.0432145	6.29342
kc07	720	489	1	Morph	rel	v2-3	D012	L1	58.78	4.0738	-0.479614	6.19236
kc07	726	533	1	Orth	unrel	v2-3	D059	L1	24.3	3.19048	-0.110353	6.27852
kc07	731	651	1	Morph	rel	v2-3	D032	L1	12.77	2.5471	0.879938	6.47851
kc07	736	463	0	Morph	rel	v2-3	D001	L1	28.51	3.35025	-0.697813	6.13773
kc07	740	588	1	Sem	rel	v2-3	D102	L1	32.03	3.46667	0.351223	6.37673
kc07	742	491	1	Morph	rel	v2-3	D007	L1	1.69	0.524729	-0.462829	6.19644
kc07	748	503	1	ID	rel	v2-3	D131	L1	3.51	1.25562	-0.362122	6.22059
kc07	750	518	1	Sem	rel	v2-3	D085	L1	54.12	3.9912	-0.236237	6.24998
kc07	754	532	1	Orth	rel	v2-3	D050	L1	28.38	3.34568	-0.118745	6.27664
kc07	756	466	1	Orth	rel	v2-3	D057	L1	1.22	0.198851	-0.672636	6.14419
kc07	758	465	1	ID	unrel	v2-3	D126	L1	168.78	5.1286	-0.681029	6.14204
kc07	762	487	1	Morph	unrel	v2-3	D004	L1	4.8	1.56862	-0.496398	6.18826
kc07	770	553	1	Sem	unrel	v2-3	D092	L1	20.07	2.99923	0.057493	6.31536
kc07	772	552	1	Sem	unrel	v2-3	D079	L1	18.65	2.92585	0.0491007	6.31355
kc07	774	423	1	ID	unrel	v2-3	D132	L1	41.49	3.72545	-1.0335	6.04737
kc07	782	530	1	ID	unrel	v2-3	D143	L1	50.54	3.92277	-0.13553	6.27288
kc07	784	409	1	Morph	rel	v2-3	D006	L1	40.47	3.70056	-1.151	6.01372
kc07	788	446	1	Morph	rel	v2-3	D033	L1	66.69	4.20006	-0.840482	6.10032
kc07	792	460	1	Sem	unrel	v2-3	D083	L1	22.5	3.11352	-0.72299	6.13123
kc07	798	568	0	Orth	rel	v2-3	D061	L1	17.03	2.83498	0.183377	6.34212
kc07	800	430	1	Sem	unrel	v2-3	D100	L1	185.61	5.22365	-0.974759	6.06379
kc07	804	540	1	Sem	rel	v2-3	D103	L1	44.19	3.7885	-0.0516068	6.29157
kc07	811	712	1	ID	rel	v2-3	D125	L1	5.54	1.71199	1.39187	6.56808
kc07	818	491	1	Orth	rel	v2-3	D070	L1	8.11	2.0931	-0.462829	6.19644
kc07	825	640	1	Sem	unrel	v2-3	D108	L1	1.76	0.565314	0.787622	6.46147
kc07	828	477	1	Orth	unrel	v2-3	D066	L1	27.09	3.29916	-0.580321	6.16752
kc07	830	468	1	Morph	unrel	v2-3	D028	L1	41.82	3.73337	-0.655852	6.14847
kc07	834	545	1	ID	rel	v2-3	D117	L1	2.36	0.858662	-0.00964531	6.30079
kc07	838	591	0	ID	unrel	v2-3	D136	L1	0.2	-1.60944	0.3764	6.38182
kc07	840	485	1	Morph	rel	v2-3	D036	L1	10.34	2.33602	-0.513183	6.18415
kc07	842	524	1	Morph	rel	v2-3	D035	L1	8.58	2.14943	-0.185883	6.26149
kc07	846	465	1	Orth	rel	v2-3	D048	L1	17.77	2.87751	-0.681029	6.14204
kc07	848	464	1	Morph	rel	v2-3	D011	L1	1.22	0.198851	-0.689421	6.13988
kc07	850	431	1	Morph	unrel	v2-3	D031	L1	20.61	3.02578	-0.966366	6.06611
kc07	854	596	1	Orth	unrel	v2-3	D039	L1	12.64	2.53687	0.418362	6.39024
kc07	858	482	1	Morph	unrel	v2-3	D020	L1	29.19	3.37383	-0.53836	6.17794
kc07	860	537	1	Orth	unrel	v2-3	D063	L1	0.07	-2.65926	-0.0767836	6.286
kc07	862	560	1	ID	unrel	v2-3	D123	L1	16.82	2.82257	0.116239	6.32794
kc07	866	605	1	Sem	unrel	v2-3	D098	L1	8.72	2.16562	0.493892	6.40523
kc07	868	436	1	Sem	rel	v2-3	D074	L1	9.26	2.2257	-0.924405	6.07764
kc07	870	402	1	ID	unrel	v2-3	D118	L1	3.58	1.27536	-1.20974	5.99645
kc07	875	656	0	Orth	unrel	v2-3	D052	L1	0.07	-2.65926	0.921899	6.48616
kc07	876	503	1	ID	unrel	v2-3	D111	L1	15.2	2.7213	-0.362122	6.22059
kc07	880	596	1	Orth	rel	v2-3	D051	L1	0.74	-0.301105	0.418362	6.39024
kc07	882	427	1	ID	rel	v2-3	D128	L1	153.99	5.03689	-0.999936	6.05678
kc07	884	442	1	Morph	unrel	v2-3	D024	L1	13.45	2.59898	-0.874051	6.09131
kc07	888	535	0	Sem	rel	v2-3	D107	L1	3.45	1.23837	-0.0935682	6.28227
kc07	891	495	1	Morph	unrel	v2-3	D009	L1	6.08	1.805	-0.42926	6.20456
kc07	893	422	1	ID	unrel	v2-3	D130	L1	2.57	0.943906	-1.0419	6.04501
kc07	897	531	1	Sem	rel	v2-3	D095	L1	1.15	0.139762	-0.127137	6.27476
kc07	899	450	1	Orth	unrel	v2-3	D067	L1	18.45	2.91506	-0.806913	6.10925
kc07	901	449	1	ID	rel	v2-3	D122	L1	60.27	4.09883	-0.815305	6.10702
kc07	907	429	1	Sem	unrel	v2-3	D106	L1	18.38	2.91126	-0.983151	6.06146
kc07	909	492	1	Morph	unrel	v2-3	D014	L1	19.66	2.97859	-0.454437	6.19848
kc07	911	418	1	Sem	unrel	v2-3	D096	L1	41.15	3.71722	-1.07547	6.03548
kc07	915	528	1	Orth	unrel	v2-3	D071	L1	0.68	-0.385662	-0.152314	6.2691
kc07	917	407	1	ID	rel	v2-3	D116	L1	21.62	3.07362	-1.16778	6.00881
kc07	919	454	1	Morph	rel	v2-3	D023	L1	3.83	1.34286	-0.773344	6.1181
kc07	923	427	1	ID	unrel	v2-3	D134	L1	12.91	2.558	-0.999936	6.05678
kc07	927	424	1	ID	rel	v2-3	D113	L1	9.32	2.23216	-1.02511	6.04973
kc07	929	375	1	ID	rel	v2-3	D142	L1	38.24	3.64388	-1.43633	5.92693
kc07	933	453	1	Sem	rel	v2-3	D101	L1	79.05	4.37008	-0.781736	6.11589
kc07	935	587	1	Orth	rel	v2-3	D055	L1	0.47	-0.755023	0.342831	6.37502
kc07	939	505	1	Sem	unrel	v2-3	D082	L1	8.18	2.10169	-0.345337	6.22456
kc07	943	494	1	Morph	rel	v2-3	D021	L1	3.11	1.13462	-0.437652	6.20254
kc07	945	525	1	Orth	unrel	v2-3	D072	L1	82.5	4.4128	-0.177491	6.2634
kc07	951	441	1	Orth	rel	v2-3	D060	L1	10.41	2.34277	-0.882444	6.08904
kc07	957	574	1	Orth	unrel	v2-3	D043	L1	2.64	0.970779	0.233731	6.35263
kc07	959	452	1	Sem	rel	v2-3	D084	L1	19.19	2.95439	-0.790128	6.11368
kc07	963	458	1	Orth	unrel	v2-3	D069	L1	83.58	4.4258	-0.739775	6.12687
kc07	971	541	0	Orth	rel	v2-3	D062	L1	0.27	-1.30933	-0.0432145	6.29342
kc07	973	435	1	Morph	rel	v2-3	D030	L1	4.66	1.53902	-0.932797	6.07535
kc07	979	512	1	Morph	rel	v2-3	D005	L1	2.64	0.970779	-0.286591	6.23832
kc07	981	462	1	ID	unrel	v2-3	D112	L1	19.05	2.94707	-0.706205	6.13556
kc07	990	649	1	ID	rel	v2-3	D119	L1	20	2.99573	0.863153	6.47543
kc07	995	454	1	Sem	unrel	v2-3	D091	L1	15.41	2.73502	-0.773344	6.1181
kc07	997	556	1	Orth	rel	v2-3	D041	L1	29.8	3.39451	0.0826699	6.32077
kc07	999	515	1	Sem	rel	v2-3	D087	L1	4.86	1.58104	-0.261414	6.24417
kc07	1003	456	1	ID	rel	v2-3	D140	L1	16.69	2.81481	-0.756559	6.12249
kc07	1005	583	1	Orth	unrel	v2-3	D038	L1	0.273	-1.29828	0.309262	6.36819
kc07	1007	486	1	ID	unrel	v2-3	D109	L1	55.14	4.00988	-0.50479	6.18621
kc07	1011	475	1	Morph	rel	v2-3	D008	L1	24.86	3.21326	-0.597106	6.16331
kc07	1013	466	1	ID	rel	v2-3	D137	L1	3.72	1.31372	-0.672636	6.14419
kc07	1015	585	1	Morph	rel	v2-3	D017	L1	27.36	3.30908	0.326046	6.37161
kc07	1023	500	1	Morph	rel	v2-3	D015	L1	11.82	2.46979	-0.387298	6.21461
kc07	1031	503	1	Sem	rel	v2-3	D078	L1	13.78	2.62322	-0.362122	6.22059
kc07	1039	450	1	Sem	unrel	v2-3	D077	L1	1.62	0.482426	-0.806913	6.10925
kc07	1045	502	1	ID	unrel	v2-3	D133	L1	11.01	2.3988	-0.370514	6.2186
kc07	1051	474	1	Morph	rel	v2-3	D022	L1	5.61	1.72455	-0.605498	6.16121
kc07	1056	808	1	Orth	rel	v2-3	D046	L1	0.61	-0.494296	2.19753	6.69456
kc07	1057	542	1	ID	rel	v2-3	D124	L1	1.62	0.482426	-0.0348222	6.29527
kc07	1065	465	1	ID	rel	v2-3	D139	L1	2.03	0.708036	-0.681029	6.14204
kc07	1067	464	1	Orth	rel	v2-3	D053	L1	31.96	3.46449	-0.689421	6.13988
kc07	1075	515	1	Orth	rel	v2-3	D049	L1	6.35	1.84845	-0.261414	6.24417
kc07	1083	478	1	Sem	rel	v2-3	D075	L1	11.89	2.4757	-0.571929	6.16961
kc07	1089	474	1	ID	unrel	v2-3	D110	L1	2.91	1.06815	-0.605498	6.16121
kc07	1098	661	1	Sem	rel	v2-3	D105	L1	163.78	5.09852	0.96386	6.49375
kc07	1099	572	1	Morph	rel	v2-3	D003	L1	1.15	0.139762	0.216947	6.34914
kc07	1101	610	1	ID	unrel	v2-3	D129	L1	1.55	0.438255	0.535854	6.41346
kc07	1109	606	1	Morph	unrel	v2-3	D010	L1	17.03	2.83498	0.502284	6.40688
kc07	1113	467	1	Orth	unrel	v2-3	D042	L1	0.27	-1.30933	-0.664244	6.14633
kc07	1121	478	1	ID	rel	v2-3	D138	L1	19.59	2.97502	-0.571929	6.16961
kc07	1127	514	1	Orth	unrel	v2-3	D037	L1	257.57	5.55129	-0.269806	6.24222
kc07	1131	448	1	Morph	unrel	v2-3	D032	L1	12.77	2.5471	-0.823698	6.10479
kc07	1133	518	0	Morph	rel	v2-3	D034	L1	18.65	2.92585	-0.236237	6.24998
kc07	1139	571	1	Sem	unrel	v2-3	D089	L1	60.81	4.10775	0.208554	6.34739
kc07	1143	472	1	Orth	unrel	v2-3	D058	L1	15.14	2.71734	-0.622283	6.15698
kc07	1151	435	1	Sem	rel	v2-3	D073	L1	16.76	2.819	-0.932797	6.07535
kc07	1155	472	1	Orth	unrel	v2-3	D050	L1	28.38	3.34568	-0.622283	6.15698
kc07	1159	454	1	ID	rel	v2-3	D126	L1	168.78	5.1286	-0.773344	6.1181
kc07	1165	618	1	Morph	unrel	v2-3	D029	L1	6.01	1.79342	0.602992	6.42649
kc07	1169	464	1	Morph	rel	v2-3	D027	L1	24.93	3.21607	-0.689421	6.13988
kc07	1173	477	0	Sem	rel	v2-3	D099	L1	34.66	3.54559	-0.580321	6.16752
kc08	25	850	1	Orth	unrel	v1-4	D068	L1	7.97	2.07568	0.516911	6.74524
kc08	29	711	1	ID	rel	v1-4	D123	L1	16.82	2.82257	-0.172551	6.56667
kc08	31	1110	1	Orth	unrel	v1-4	D040	L1	2.77	1.01885	1.80655	7.01212
kc08	35	771	1	Orth	unrel	v1-4	D048	L1	17.77	2.87751	0.125058	6.64769
kc08	39	745	1	Orth	rel	v1-4	D057	L1	1.22	0.198851	-0.00390591	6.61338
kc08	43	702	1	ID	rel	v1-4	D115	L1	13.18	2.5787	-0.217193	6.55393
kc08	47	780	1	Sem	rel	v1-4	D084	L1	19.19	2.95439	0.1697	6.65929
kc08	49	858	1	Morph	unrel	v1-4	D008	L1	24.86	3.21326	0.556593	6.7546
kc08	52	552	1	Morph	rel	v1-4	D006	L1	40.47	3.70056	-0.961217	6.31355
kc08	55	823	1	Sem	rel	v1-4	D092	L1	20.07	2.99923	0.382987	6.71296
kc08	57	669	1	Sem	rel	v1-4	D100	L1	185.61	5.22365	-0.380878	6.50578
kc08	65	792	1	Morph	unrel	v1-4	D035	L1	8.58	2.14943	0.229222	6.67456
kc08	71	724	1	ID	unrel	v1-4	D141	L1	10.68	2.36837	-0.108069	6.58479
kc08	75	634	1	Morph	unrel	v1-4	D014	L1	19.66	2.97859	-0.554484	6.45205
kc08	77	761	1	Morph	unrel	v1-4	D033	L1	66.69	4.20006	0.0754567	6.63463
kc08	85	812	1	Morph	unrel	v1-4	D032	L1	12.77	2.5471	0.328425	6.6995
kc08	87	1098	1	ID	rel	v1-4	D125	L1	5.54	1.71199	1.74703	7.00125
kc08	91	824	1	Morph	unrel	v1-4	D016	L1	178.04	5.18201	0.387947	6.71417
kc08	103	672	1	ID	unrel	v1-4	D120	L1	10.14	2.31649	-0.365998	6.51026
kc08	111	675	1	ID	rel	v1-4	D142	L1	38.24	3.64388	-0.351117	6.51471
kc08	119	702	1	Morph	rel	v1-4	D036	L1	10.34	2.33602	-0.217193	6.55393
kc08	127	737	1	Orth	unrel	v1-4	D053	L1	31.96	3.46449	-0.0435872	6.60259
kc08	135	820	1	Sem	rel	v1-4	D101	L1	79.05	4.37008	0.368106	6.7093
kc08	141	1008	1	ID	unrel	v1-4	D110	L1	2.91	1.06815	1.30062	6.91572
kc08	143	839	1	Sem	rel	v1-4	D082	L1	8.18	2.10169	0.462349	6.73221
kc08	145	830	1	Morph	unrel	v1-4	D023	L1	3.83	1.34286	0.417708	6.72143
kc08	149	915	1	Orth	unrel	v1-4	D067	L1	18.45	2.91506	0.839322	6.81892
kc08	151	762	1	Morph	rel	v1-4	D005	L1	2.64	0.970779	0.0804169	6.63595
kc08	153	681	1	Orth	rel	v1-4	D045	L1	30.88	3.43011	-0.321356	6.52356
kc08	156	598	1	ID	unrel	v1-4	D121	L1	9.8	2.28238	-0.73305	6.39359
kc08	161	788	1	Orth	rel	v1-4	D066	L1	27.09	3.29916	0.209381	6.6695
kc08	163	882	1	ID	rel	v1-4	D134	L1	12.91	2.558	0.675636	6.78219
kc08	165	969	1	Morph	unrel	v1-4	D020	L1	29.19	3.37383	1.10717	6.87626
kc08	169	1014	0	Sem	unrel	v1-4	D095	L1	1.15	0.139762	1.33038	6.92166
kc08	173	852	1	ID	unrel	v1-4	D119	L1	20	2.99573	0.526832	6.74759
kc08	175	851	1	ID	rel	v1-4	D144	L1	0.68	-0.385662	0.521871	6.74641
kc08	177	818	1	Orth	rel	v1-4	D060	L1	10.41	2.34277	0.358186	6.70686
kc08	185	796	1	ID	unrel	v1-4	D118	L1	3.58	1.27536	0.249062	6.6796
kc08	187	835	0	Morph	unrel	v1-4	D013	L1	2.03	0.708036	0.442509	6.72743
kc08	193	823	1	Morph	rel	v1-4	D034	L1	18.65	2.92585	0.382987	6.71296
kc08	195	822	1	Orth	rel	v1-4	D064	L1	164.12	5.1006	0.378027	6.71174
kc08	197	949	1	ID	unrel	v1-4	D126	L1	168.78	5.1286	1.00797	6.85541
kc08	201	1034	1	Morph	unrel	v1-4	D010	L1	17.03	2.83498	1.42958	6.94119
kc08	209	693	1	Sem	rel	v1-4	D077	L1	1.62	0.482426	-0.261834	6.54103
kc08	211	932	1	Sem	unrel	v1-4	D091	L1	15.41	2.73502	0.923645	6.83733
kc08	213	683	1	Morph	rel	v1-4	D015	L1	11.82	2.46979	-0.311436	6.52649
kc08	219	647	1	Sem	unrel	v1-4	D098	L1	8.72	2.16562	-0.490002	6.47235
kc08	223	636	1	Sem	rel	v1-4	D075	L1	11.89	2.4757	-0.544564	6.4552
kc08	227	794	1	Orth	unrel	v1-4	D050	L1	28.38	3.34568	0.239142	6.67708
kc08	229	945	1	Morph	unrel	v1-4	D007	L1	1.69	0.524729	0.988127	6.85118
kc08	231	655	1	Sem	unrel	v1-4	D073	L1	16.76	2.819	-0.450321	6.48464
kc08	235	826	1	Sem	unrel	v1-4	D088	L1	2.03	0.708036	0.397867	6.71659
kc08	237	1009	1	Sem	rel	v1-4	D089	L1	60.81	4.10775	1.30558	6.91672
kc08	240	606	1	ID	rel	v1-4	D122	L1	60.27	4.09883	-0.693369	6.40688
kc08	243	965	1	ID	rel	v1-4	D129	L1	1.55	0.438255	1.08733	6.87213
kc08	253	847	0	Orth	rel	v1-4	D052	L1	0.07	-2.65926	0.502031	6.7417
kc08	263	816	1	Morph	rel	v1-4	D017	L1	27.36	3.30908	0.348266	6.70441
kc08	265	807	1	Orth	unrel	v1-4	D071	L1	0.68	-0.385662	0.303624	6.69332
kc08	269	1197	1	Orth	unrel	v1-4	D044	L1	10.1	2.31254	2.23809	7.08757
kc08	270	587	1	ID	rel	v1-4	D132	L1	41.49	3.72545	-0.787612	6.37502
kc08	273	706	1	Orth	rel	v1-4	D049	L1	6.35	1.84845	-0.197352	6.55962
kc08	276	576	1	Morph	rel	v1-4	D011	L1	1.22	0.198851	-0.842173	6.35611
kc08	278	614	1	Sem	unrel	v1-4	D106	L1	18.38	2.91126	-0.653687	6.41999
kc08	282	540	1	Sem	rel	v1-4	D083	L1	22.5	3.11352	-1.02074	6.29157
kc08	286	561	1	Sem	rel	v1-4	D086	L1	24.19	3.18594	-0.916576	6.32972
kc08	295	732	1	Sem	unrel	v1-4	D079	L1	18.65	2.92585	-0.068388	6.59578
kc08	300	600	1	Morph	rel	v1-4	D021	L1	3.11	1.13462	-0.72313	6.39693
kc08	303	799	1	ID	unrel	v1-4	D133	L1	11.01	2.3988	0.263943	6.68336
kc08	305	830	1	Sem	rel	v1-4	D087	L1	4.86	1.58104	0.417708	6.72143
kc08	311	714	1	Orth	unrel	v1-4	D059	L1	24.3	3.19048	-0.157671	6.57088
kc08	314	838	1	Morph	unrel	v1-4	D022	L1	5.61	1.72455	0.457389	6.73102
kc08	318	700	1	Morph	unrel	v1-4	D031	L1	20.61	3.02578	-0.227113	6.55108
kc08	320	642	1	ID	unrel	v1-4	D114	L1	11.01	2.3988	-0.514803	6.46459
kc08	324	688	1	ID	unrel	v1-4	D139	L1	2.03	0.708036	-0.286635	6.53379
kc08	326	758	1	Morph	unrel	v1-4	D012	L1	58.78	4.0738	0.0605762	6.63068
kc08	328	1221	1	Orth	rel	v1-4	D061	L1	17.03	2.83498	2.35713	7.10743
kc08	336	944	0	Orth	unrel	v1-4	D063	L1	0.07	-2.65926	0.983167	6.85013
kc08	337	575	1	Sem	rel	v1-4	D085	L1	54.12	3.9912	-0.847134	6.35437
kc08	344	731	1	Morph	rel	v1-4	D030	L1	4.66	1.53902	-0.0733482	6.59441
kc08	348	649	1	ID	unrel	v1-4	D135	L1	37.3	3.61899	-0.480082	6.47543
kc08	352	742	1	ID	rel	v1-4	D124	L1	1.62	0.482426	-0.0187864	6.60935
kc08	360	785	1	Morph	rel	v1-4	D003	L1	1.15	0.139762	0.194501	6.66568
kc08	361	592	1	Morph	unrel	v1-4	D018	L1	7.57	2.02419	-0.762811	6.38351
kc08	368	980	1	Orth	unrel	v1-4	D046	L1	0.61	-0.494296	1.16173	6.88755
kc08	370	843	1	Sem	rel	v1-4	D103	L1	44.19	3.7885	0.48219	6.73697
kc08	372	633	1	Sem	rel	v1-4	D097	L1	43.85	3.78077	-0.559444	6.45047
kc08	380	780	1	ID	rel	v1-4	D117	L1	2.36	0.858662	0.1697	6.65929
kc08	382	659	1	Sem	unrel	v1-4	D078	L1	13.78	2.62322	-0.43048	6.49072
kc08	386	672	1	Sem	rel	v1-4	D080	L1	149.26	5.00569	-0.365998	6.51026
kc08	388	647	1	Orth	unrel	v1-4	D072	L1	82.5	4.4128	-0.490002	6.47235
kc08	392	701	1	ID	unrel	v1-4	D143	L1	50.54	3.92277	-0.222153	6.55251
kc08	393	596	1	Morph	unrel	v1-4	D009	L1	6.08	1.805	-0.74297	6.39024
kc08	396	706	1	ID	unrel	v1-4	D131	L1	3.51	1.25562	-0.197352	6.55962
kc08	399	560	1	ID	rel	v1-4	D109	L1	55.14	4.00988	-0.921536	6.32794
kc08	402	1086	1	Sem	unrel	v1-4	D076	L1	18.24	2.90362	1.68751	6.99026
kc08	410	873	1	Orth	rel	v1-4	D038	L1	0.273	-1.29828	0.630995	6.77194
kc08	412	648	1	Sem	rel	v1-4	D105	L1	163.78	5.09852	-0.485042	6.47389
kc08	417	540	1	Orth	rel	v1-4	D058	L1	15.14	2.71734	-1.02074	6.29157
kc08	421	562	1	Orth	unrel	v1-4	D047	L1	17.77	2.87751	-0.911616	6.3315
kc08	430	1221	0	Orth	rel	v1-4	D065	L1	0.14	-1.96611	2.35713	7.10743
kc08	438	928	1	Morph	rel	v1-4	D024	L1	13.45	2.59898	0.903804	6.83303
kc08	446	771	1	Orth	unrel	v1-4	D041	L1	29.8	3.39451	0.125058	6.64769
kc08	452	655	1	Sem	unrel	v1-4	D074	L1	9.26	2.2257	-0.450321	6.48464
kc08	453	582	1	Orth	rel	v1-4	D037	L1	257.57	5.55129	-0.812412	6.36647
kc08	456	652	1	Sem	unrel	v1-4	D081	L1	7.3	1.98787	-0.465201	6.48004
kc08	459	626	1	Sem	unrel	v1-4	D093	L1	11.49	2.44148	-0.594165	6.43935
kc08	464	767	1	Orth	rel	v1-4	D070	L1	8.11	2.0931	0.105218	6.64249
kc08	466	766	1	Sem	rel	v1-4	D090	L1	14.59	2.68034	0.100258	6.64118
kc08	474	665	1	Morph	rel	v1-4	D019	L1	0.47	-0.755023	-0.400719	6.49979
kc08	477	526	1	ID	unrel	v1-4	D137	L1	3.72	1.31372	-1.09018	6.2653
kc08	486	665	1	Orth	rel	v1-4	D054	L1	70.34	4.25334	-0.400719	6.49979
kc08	492	669	1	Sem	unrel	v1-4	D104	L1	29.26	3.37622	-0.380878	6.50578
kc08	506	629	1	Sem	unrel	v1-4	D099	L1	34.66	3.54559	-0.579285	6.44413
kc08	508	891	1	Orth	unrel	v1-4	D069	L1	83.58	4.4258	0.720278	6.79234
kc08	512	689	1	ID	unrel	v1-4	D142	L1	38.24	3.64388	-0.281675	6.53524
kc08	519	596	1	Morph	unrel	v1-4	D036	L1	10.34	2.33602	-0.74297	6.39024
kc08	522	650	1	Morph	unrel	v1-4	D029	L1	6.01	1.79342	-0.475121	6.47697
kc08	530	645	1	ID	rel	v1-4	D128	L1	153.99	5.03689	-0.499922	6.46925
kc08	538	672	1	Orth	rel	v1-4	D051	L1	0.74	-0.301105	-0.365998	6.51026
kc08	542	790	1	ID	rel	v1-4	D116	L1	21.62	3.07362	0.219301	6.67203
kc08	544	821	1	Morph	rel	v1-4	D025	L1	48.85	3.88875	0.373066	6.71052
kc08	550	633	1	Morph	rel	v1-4	D027	L1	24.93	3.21607	-0.559444	6.45047
kc08	554	702	1	ID	rel	v1-4	D112	L1	19.05	2.94707	-0.217193	6.55393
kc08	557	572	1	ID	rel	v1-4	D121	L1	9.8	2.28238	-0.862014	6.34914
kc08	562	769	1	Orth	unrel	v1-4	D066	L1	27.09	3.29916	0.115138	6.64509
kc08	566	671	1	Morph	rel	v1-4	D028	L1	41.82	3.73337	-0.370958	6.50877
kc08	570	844	1	Sem	rel	v1-4	D095	L1	1.15	0.139762	0.48715	6.73815
kc08	573	482	1	ID	rel	v1-4	D119	L1	20	2.99573	-1.30843	6.17794
kc08	575	560	1	ID	unrel	v1-4	D144	L1	0.68	-0.385662	-0.921536	6.32794
kc08	578	687	1	Orth	unrel	v1-4	D060	L1	10.41	2.34277	-0.291595	6.53233
kc08	585	626	1	Morph	rel	v1-4	D002	L1	16.96	2.83086	-0.594165	6.43935
kc08	590	751	1	Orth	rel	v1-4	D043	L1	2.64	0.970779	0.0258551	6.62141
kc08	594	661	1	Morph	unrel	v1-4	D034	L1	18.65	2.92585	-0.42056	6.49375
kc08	598	754	1	ID	rel	v1-4	D126	L1	168.78	5.1286	0.0407356	6.62539
kc08	605	1187	1	Morph	rel	v1-4	D013	L1	2.03	0.708036	2.18849	7.07918
kc08	611	672	1	Sem	unrel	v1-4	D077	L1	1.62	0.482426	-0.365998	6.51026
kc08	615	1125	1	Morph	rel	v1-4	D001	L1	28.51	3.35025	1.88096	7.02554
kc08	621	705	1	Sem	rel	v1-4	D096	L1	41.15	3.71722	-0.202312	6.5582
kc08	629	812	1	Orth	rel	v1-4	D050	L1	28.38	3.34568	0.328425	6.6995
kc08	631	779	1	Morph	rel	v1-4	D007	L1	1.69	0.524729	0.16474	6.65801
kc08	635	912	1	ID	rel	v1-4	D113	L1	9.32	2.23216	0.824441	6.81564
kc08	637	719	1	Sem	rel	v1-4	D088	L1	2.03	0.708036	-0.13287	6.57786
kc08	639	638	1	Sem	unrel	v1-4	D089	L1	60.81	4.10775	-0.534643	6.45834
kc08	643	659	1	ID	rel	v1-4	D140	L1	16.69	2.81481	-0.43048	6.49072
kc08	645	639	1	ID	unrel	v1-4	D129	L1	1.55	0.438255	-0.529683	6.4599
kc08	649	1221	1	ID	rel	v1-4	D136	L1	0.2	-1.60944	2.35713	7.10743
kc08	655	1121	1	Orth	unrel	v1-4	D052	L1	0.07	-2.65926	1.86112	7.02198
kc08	659	1214	1	ID	unrel	v1-4	D130	L1	2.57	0.943906	2.32241	7.10168
kc08	663	732	1	Morph	rel	v1-4	D023	L1	3.83	1.34286	-0.068388	6.59578
kc08	667	650	1	Orth	rel	v1-4	D071	L1	0.68	-0.385662	-0.475121	6.47697
kc08	670	575	1	Orth	rel	v1-4	D044	L1	10.1	2.31254	-0.847134	6.35437
kc08	672	566	1	ID	unrel	v1-4	D122	L1	60.27	4.09883	-0.891775	6.33859
kc08	674	572	1	Orth	unrel	v1-4	D049	L1	6.35	1.84845	-0.862014	6.34914
kc08	679	690	1	Sem	rel	v1-4	D094	L1	12.77	2.5471	-0.276715	6.53669
kc08	680	601	1	ID	unrel	v1-4	D111	L1	15.2	2.7213	-0.718169	6.39859
kc08	684	566	1	ID	rel	v1-4	D138	L1	19.59	2.97502	-0.891775	6.33859
kc08	686	541	1	Sem	rel	v1-4	D091	L1	15.41	2.73502	-1.01578	6.29342
kc08	688	548	1	Sem	unrel	v1-4	D086	L1	24.19	3.18594	-0.981058	6.30628
kc08	692	553	1	Morph	rel	v1-4	D026	L1	38.99	3.66331	-0.956257	6.31536
kc08	696	510	1	Sem	rel	v1-4	D079	L1	18.65	2.92585	-1.16954	6.23441
kc08	699	765	1	ID	unrel	v1-4	D127	L1	10.41	2.34277	0.0952973	6.63988
kc08	702	611	1	Morph	unrel	v1-4	D021	L1	3.11	1.13462	-0.668568	6.4151
kc08	706	600	1	Sem	unrel	v1-4	D087	L1	4.86	1.58104	-0.72313	6.39693
kc08	712	580	1	Orth	rel	v1-4	D059	L1	24.3	3.19048	-0.822333	6.36303
kc08	718	609	1	Morph	rel	v1-4	D031	L1	20.61	3.02578	-0.678488	6.41182
kc08	725	861	1	ID	rel	v1-4	D139	L1	2.03	0.708036	0.571473	6.75809
kc08	727	931	1	Morph	rel	v1-4	D012	L1	58.78	4.0738	0.918684	6.83626
kc08	729	770	1	Orth	unrel	v1-4	D061	L1	17.03	2.83498	0.120098	6.64639
kc08	733	1112	0	Orth	rel	v1-4	D062	L1	0.27	-1.30933	1.81647	7.01392
kc08	737	693	0	Orth	rel	v1-4	D063	L1	0.07	-2.65926	-0.261834	6.54103
kc08	738	572	1	Sem	unrel	v1-4	D085	L1	54.12	3.9912	-0.862014	6.34914
kc08	741	651	1	Morph	rel	v1-4	D004	L1	4.8	1.56862	-0.470161	6.47851
kc08	745	648	1	Morph	unrel	v1-4	D030	L1	4.66	1.53902	-0.485042	6.47389
kc08	746	591	1	Sem	rel	v1-4	D102	L1	32.03	3.46667	-0.767771	6.38182
kc08	755	666	1	ID	rel	v1-4	D133	L1	11.01	2.3988	-0.395759	6.50129
kc08	758	583	1	Morph	unrel	v1-4	D015	L1	11.82	2.46979	-0.807452	6.36819
kc08	760	510	1	Morph	unrel	v1-4	D003	L1	1.15	0.139762	-1.16954	6.23441
kc08	763	789	1	Morph	rel	v1-4	D018	L1	7.57	2.02419	0.214341	6.67077
kc08	769	641	1	Orth	rel	v1-4	D046	L1	0.61	-0.494296	-0.519763	6.46303
kc08	771	672	1	Orth	rel	v1-4	D039	L1	12.64	2.53687	-0.365998	6.51026
kc08	773	630	1	Sem	unrel	v1-4	D097	L1	43.85	3.78077	-0.574325	6.44572
kc08	777	660	1	Orth	rel	v1-4	D048	L1	17.77	2.87751	-0.42552	6.49224
kc08	782	464	1	ID	rel	v1-4	D120	L1	10.14	2.31649	-1.39771	6.13988
kc08	786	510	1	Morph	rel	v1-4	D020	L1	29.19	3.37383	-1.16954	6.23441
kc08	789	732	1	Sem	unrel	v1-4	D083	L1	22.5	3.11352	-0.068388	6.59578
kc08	795	968	1	Orth	unrel	v1-4	D056	L1	5.58	1.71919	1.10221	6.87523
kc08	796	575	1	Morph	rel	v1-4	D035	L1	8.58	2.14943	-0.847134	6.35437
kc08	800	509	1	ID	unrel	v1-4	D109	L1	55.14	4.00988	-1.1745	6.23245
kc08	803	707	1	Sem	rel	v1-4	D076	L1	18.24	2.90362	-0.192392	6.56103
kc08	804	538	1	Sem	unrel	v1-4	D092	L1	20.07	2.99923	-1.03066	6.28786
kc08	810	534	1	Sem	rel	v1-4	D106	L1	18.38	2.91126	-1.0505	6.2804
kc08	813	661	1	Morph	rel	v1-4	D014	L1	19.66	2.97859	-0.42056	6.49375
kc08	814	564	1	Morph	rel	v1-4	D022	L1	5.61	1.72455	-0.901695	6.33505
kc08	821	688	1	Sem	unrel	v1-4	D108	L1	1.76	0.565314	-0.286635	6.53379
kc08	822	495	1	Morph	rel	v1-4	D008	L1	24.86	3.21326	-1.24395	6.20456
kc08	825	702	1	Sem	unrel	v1-4	D080	L1	149.26	5.00569	-0.217193	6.55393
kc08	828	555	1	Orth	unrel	v1-4	D064	L1	164.12	5.1006	-0.946337	6.31897
kc08	832	576	1	ID	unrel	v1-4	D134	L1	12.91	2.558	-0.842173	6.35611
kc08	836	614	1	Sem	rel	v1-4	D073	L1	16.76	2.819	-0.653687	6.41999
kc08	839	629	1	Morph	unrel	v1-4	D024	L1	13.45	2.59898	-0.579285	6.44413
kc08	840	595	1	ID	rel	v1-4	D114	L1	11.01	2.3988	-0.74793	6.38856
kc08	846	560	1	Orth	rel	v1-4	D041	L1	29.8	3.39451	-0.921536	6.32794
kc08	850	613	1	ID	rel	v1-4	D141	L1	10.68	2.36837	-0.658647	6.41836
kc08	859	1224	1	ID	unrel	v1-4	D124	L1	1.62	0.482426	2.37201	7.10988
kc08	865	684	1	Orth	unrel	v1-4	D070	L1	8.11	2.0931	-0.306476	6.52796
kc08	867	739	1	ID	unrel	v1-4	D115	L1	13.18	2.5787	-0.0336669	6.6053
kc08	868	602	1	Morph	rel	v1-4	D032	L1	12.77	2.5471	-0.713209	6.40026
kc08	874	510	1	Orth	rel	v1-4	D053	L1	31.96	3.46449	-1.16954	6.23441
kc08	879	843	1	ID	rel	v1-4	D137	L1	3.72	1.31372	0.48219	6.73697
kc08	884	560	1	ID	unrel	v1-4	D132	L1	41.49	3.72545	-0.921536	6.32794
kc08	887	718	1	Orth	unrel	v1-4	D054	L1	70.34	4.25334	-0.13783	6.57647
kc08	889	653	1	ID	rel	v1-4	D131	L1	3.51	1.25562	-0.460241	6.48158
kc08	894	839	1	Orth	unrel	v1-4	D038	L1	0.273	-1.29828	0.462349	6.73221
kc08	899	619	1	Orth	rel	v1-4	D068	L1	7.97	2.07568	-0.628886	6.42811
kc08	902	682	1	ID	rel	v1-4	D143	L1	50.54	3.92277	-0.316396	6.52503
kc08	907	542	1	Sem	rel	v1-4	D099	L1	34.66	3.54559	-1.01082	6.29527
kc08	915	617	1	ID	unrel	v1-4	D125	L1	5.54	1.71199	-0.638807	6.42487
kc08	918	1048	1	Morph	unrel	v1-4	D011	L1	1.22	0.198851	1.49902	6.95464
kc08	921	558	1	Sem	rel	v1-4	D081	L1	7.3	1.98787	-0.931456	6.32436
kc08	929	576	1	Sem	unrel	v1-4	D101	L1	79.05	4.37008	-0.842173	6.35611
kc08	932	655	1	ID	unrel	v1-4	D128	L1	153.99	5.03689	-0.450321	6.48464
kc08	934	822	1	Orth	rel	v1-4	D040	L1	2.77	1.01885	0.378027	6.71174
kc08	939	570	1	Orth	unrel	v1-4	D045	L1	30.88	3.43011	-0.871934	6.34564
kc08	941	569	1	Sem	unrel	v1-4	D105	L1	163.78	5.09852	-0.876895	6.34388
kc08	946	630	1	Morph	unrel	v1-4	D025	L1	48.85	3.88875	-0.574325	6.44572
kc08	951	586	1	Orth	unrel	v1-4	D058	L1	15.14	2.71734	-0.792572	6.37332
kc08	956	656	1	ID	unrel	v1-4	D112	L1	19.05	2.94707	-0.44536	6.48616
kc08	958	935	1	Sem	unrel	v1-4	D082	L1	8.18	2.10169	0.938525	6.84055
kc08	959	574	1	Morph	rel	v1-4	D033	L1	66.69	4.20006	-0.852094	6.35263
kc08	965	570	1	Morph	unrel	v1-4	D006	L1	40.47	3.70056	-0.871934	6.34564
kc08	970	791	1	Morph	unrel	v1-4	D028	L1	41.82	3.73337	0.224262	6.6733
kc08	971	566	1	Orth	rel	v1-4	D069	L1	83.58	4.4258	-0.891775	6.33859
kc08	973	621	1	Orth	rel	v1-4	D067	L1	18.45	2.91506	-0.618966	6.43133
kc08	978	634	1	Morph	rel	v1-4	D009	L1	6.08	1.805	-0.554484	6.45205
kc08	986	973	1	ID	rel	v1-4	D110	L1	2.91	1.06815	1.12701	6.88038
kc08	988	708	1	Sem	unrel	v1-4	D107	L1	3.45	1.23837	-0.187432	6.56244
kc08	993	616	1	Sem	rel	v1-4	D078	L1	13.78	2.62322	-0.643767	6.42325
kc08	996	663	1	Sem	unrel	v1-4	D103	L1	44.19	3.7885	-0.410639	6.49677
kc08	1000	684	1	ID	unrel	v1-4	D123	L1	16.82	2.82257	-0.306476	6.52796
kc08	1016	706	1	Morph	unrel	v1-4	D001	L1	28.51	3.35025	-0.197352	6.55962
kc08	1021	622	1	Sem	unrel	v1-4	D096	L1	41.15	3.71722	-0.614006	6.43294
kc08	1023	581	1	ID	rel	v1-4	D118	L1	3.58	1.27536	-0.817373	6.36475
kc08	1030	697	1	Sem	rel	v1-4	D074	L1	9.26	2.2257	-0.241994	6.54679
kc08	1031	616	1	Morph	unrel	v1-4	D019	L1	0.47	-0.755023	-0.643767	6.42325
kc08	1035	525	1	ID	unrel	v1-4	D113	L1	9.32	2.23216	-1.09514	6.2634
kc08	1039	547	1	Orth	rel	v1-4	D047	L1	17.77	2.87751	-0.986018	6.30445
kc08	1043	608	1	ID	unrel	v1-4	D140	L1	16.69	2.81481	-0.683448	6.41017
kc08	1052	795	1	Sem	unrel	v1-4	D100	L1	185.61	5.22365	0.244102	6.67834
kc08	1053	578	1	Orth	rel	v1-4	D072	L1	82.5	4.4128	-0.832253	6.35957
kc08	1056	649	1	Morph	unrel	v1-4	D017	L1	27.36	3.30908	-0.480082	6.47543
kc08	1062	1157	1	Orth	rel	v1-4	D042	L1	0.27	-1.30933	2.03968	7.05359
kc08	1066	954	1	ID	rel	v1-4	D135	L1	37.3	3.61899	1.03277	6.86066
kc08	1067	553	1	Morph	rel	v1-4	D016	L1	178.04	5.18201	-0.956257	6.31536
kc08	1071	615	1	Sem	rel	v1-4	D098	L1	8.72	2.16562	-0.648727	6.42162
kc08	1073	557	1	Sem	unrel	v1-4	D075	L1	11.89	2.4757	-0.936417	6.32257
kc08	1076	636	1	ID	unrel	v1-4	D117	L1	2.36	0.858662	-0.544564	6.4552
kc08	1079	626	1	Sem	unrel	v1-4	D094	L1	12.77	2.5471	-0.594165	6.43935
kc08	1082	792	1	ID	rel	v1-4	D111	L1	15.2	2.7213	0.229222	6.67456
kc08	1084	1191	1	Orth	unrel	v1-4	D057	L1	1.22	0.198851	2.20833	7.08255
kc08	1088	668	1	ID	unrel	v1-4	D138	L1	19.59	2.97502	-0.385838	6.50429
kc08	1090	739	1	Sem	unrel	v1-4	D084	L1	19.19	2.95439	-0.0336669	6.6053
kc08	1091	498	1	Morph	unrel	v1-4	D002	L1	16.96	2.83086	-1.22907	6.2106
kc08	1095	552	1	Morph	unrel	v1-4	D026	L1	38.99	3.66331	-0.961217	6.31355
kc08	1100	1141	1	ID	rel	v1-4	D127	L1	10.41	2.34277	1.96032	7.03966
kc08	1106	705	1	Morph	rel	v1-4	D010	L1	17.03	2.83498	-0.202312	6.5582
kc08	1113	580	1	Morph	unrel	v1-4	D027	L1	24.93	3.21607	-0.822333	6.36303
kc08	1122	639	1	Orth	unrel	v1-4	D037	L1	257.57	5.55129	-0.529683	6.4599
kc08	1130	754	1	Sem	rel	v1-4	D093	L1	11.49	2.44148	0.0407356	6.62539
kc08	1139	612	1	Sem	unrel	v1-4	D090	L1	14.59	2.68034	-0.663608	6.41673
kc08	1148	647	1	ID	unrel	v1-4	D116	L1	21.62	3.07362	-0.490002	6.47235
kc08	1152	668	1	Sem	unrel	v1-4	D102	L1	32.03	3.46667	-0.385838	6.50429
kc08	1156	642	1	Orth	unrel	v1-4	D051	L1	0.74	-0.301105	-0.514803	6.46459
kc08	1159	559	1	Morph	rel	v1-4	D029	L1	6.01	1.79342	-0.926496	6.32615
kc08	1164	1060	0	ID	unrel	v1-4	D136	L1	0.2	-1.60944	1.55855	6.96602
kc08	1170	633	1	Sem	rel	v1-4	D104	L1	29.26	3.37622	-0.559444	6.45047
kc08	1174	678	1	Orth	unrel	v1-4	D039	L1	12.64	2.53687	-0.336237	6.51915
kc09	26	610	1	ID	rel	v2-4	D118	L1	3.58	1.27536	0.940083	6.41346
kc09	34	493	1	ID	rel	v2-4	D138	L1	19.59	2.97502	-0.330811	6.20051
kc09	42	584	1	Orth	unrel	v2-4	D044	L1	10.1	2.31254	0.657662	6.3699
kc09	45	679	1	Sem	rel	v2-4	D086	L1	24.19	3.18594	1.68959	6.52062
kc09	48	484	1	Morph	unrel	v2-4	D028	L1	41.82	3.73337	-0.428572	6.18208
kc09	54	600	1	Sem	unrel	v2-4	D075	L1	11.89	2.4757	0.83146	6.39693
kc09	58	614	1	Sem	unrel	v2-4	D094	L1	12.77	2.5471	0.983533	6.41999
kc09	60	564	1	Morph	unrel	v2-4	D015	L1	11.82	2.46979	0.440415	6.33505
kc09	66	529	1	Sem	unrel	v2-4	D083	L1	22.5	3.11352	0.0602332	6.27099
kc09	68	504	1	Sem	rel	v2-4	D101	L1	79.05	4.37008	-0.211325	6.22258
kc09	72	501	0	Orth	unrel	v2-4	D038	L1	0.273	-1.29828	-0.243912	6.21661
kc09	80	440	1	Orth	unrel	v2-4	D064	L1	164.12	5.1006	-0.906516	6.08677
kc09	82	559	1	Orth	unrel	v2-4	D041	L1	29.8	3.39451	0.386104	6.32615
kc09	86	508	1	Orth	unrel	v2-4	D049	L1	6.35	1.84845	-0.167876	6.23048
kc09	88	547	1	ID	unrel	v2-4	D137	L1	3.72	1.31372	0.255755	6.30445
kc09	90	466	1	ID	rel	v2-4	D121	L1	9.8	2.28238	-0.624095	6.14419
kc09	94	447	1	Morph	rel	v2-4	D026	L1	38.99	3.66331	-0.830479	6.10256
kc09	99	629	0	Orth	unrel	v2-4	D062	L1	0.27	-1.30933	1.14647	6.44413
kc09	100	435	1	ID	rel	v2-4	D123	L1	16.82	2.82257	-0.960827	6.07535
kc09	106	415	1	Orth	rel	v2-4	D060	L1	10.41	2.34277	-1.17807	6.02828
kc09	110	445	1	ID	rel	v2-4	D120	L1	10.14	2.31649	-0.852204	6.09807
kc09	116	425	1	ID	unrel	v2-4	D140	L1	16.69	2.81481	-1.06945	6.05209
kc09	120	551	1	Orth	rel	v2-4	D068	L1	7.97	2.07568	0.299205	6.31173
kc09	122	453	0	ID	unrel	v2-4	D109	L1	55.14	4.00988	-0.765305	6.11589
kc09	124	516	1	Sem	unrel	v2-4	D079	L1	18.65	2.92585	-0.0809773	6.24611
kc09	130	480	1	ID	rel	v2-4	D144	L1	0.68	-0.385662	-0.472022	6.17379
kc09	132	551	1	Orth	unrel	v2-4	D040	L1	2.77	1.01885	0.299205	6.31173
kc09	136	468	1	Morph	rel	v2-4	D032	L1	12.77	2.5471	-0.60237	6.14847
kc09	144	576	1	Sem	rel	v2-4	D074	L1	9.26	2.2257	0.570764	6.35611
kc09	153	738	1	Orth	rel	v2-4	D039	L1	12.64	2.53687	2.33046	6.60394
kc09	161	645	1	Sem	unrel	v2-4	D107	L1	3.45	1.23837	1.32027	6.46925
kc09	168	456	1	Morph	unrel	v2-4	D027	L1	24.93	3.21607	-0.732718	6.12249
kc09	179	658	1	Sem	unrel	v2-4	D092	L1	20.07	2.99923	1.46148	6.4892
kc09	180	625	1	ID	rel	v2-4	D133	L1	11.01	2.3988	1.10302	6.43775
kc09	184	534	1	Orth	rel	v2-4	D051	L1	0.74	-0.301105	0.114545	6.2804
kc09	186	581	1	ID	unrel	v2-4	D134	L1	12.91	2.558	0.625075	6.36475
kc09	188	476	1	Orth	rel	v2-4	D047	L1	17.77	2.87751	-0.515471	6.16542
kc09	192	505	1	ID	unrel	v2-4	D112	L1	19.05	2.94707	-0.200463	6.22456
kc09	194	512	0	Orth	rel	v2-4	D048	L1	17.77	2.87751	-0.124427	6.23832
kc09	196	431	1	Orth	rel	v2-4	D053	L1	31.96	3.46449	-1.00428	6.06611
kc09	200	468	1	Sem	rel	v2-4	D080	L1	149.26	5.00569	-0.60237	6.14847
kc09	202	523	1	Morph	unrel	v2-4	D025	L1	48.85	3.88875	-0.00494086	6.25958
kc09	204	562	1	Morph	rel	v2-4	D018	L1	7.57	2.02419	0.418691	6.3315
kc09	208	543	1	Orth	rel	v2-4	D046	L1	0.61	-0.494296	0.212306	6.29711
kc09	210	574	1	Morph	unrel	v2-4	D024	L1	13.45	2.59898	0.549039	6.35263
kc09	212	524	1	Orth	unrel	v2-4	D042	L1	0.27	-1.30933	0.00592149	6.26149
kc09	216	498	1	Sem	rel	v2-4	D090	L1	14.59	2.68034	-0.2765	6.2106
kc09	218	441	1	Sem	rel	v2-4	D096	L1	41.15	3.71722	-0.895653	6.08904
kc09	222	438	1	Morph	rel	v2-4	D001	L1	28.51	3.35025	-0.92824	6.08222
kc09	224	437	1	Sem	unrel	v2-4	D104	L1	29.26	3.37622	-0.939103	6.07993
kc09	226	428	1	ID	rel	v2-4	D132	L1	41.49	3.72545	-1.03686	6.05912
kc09	230	561	1	ID	unrel	v2-4	D141	L1	10.68	2.36837	0.407828	6.32972
kc09	234	407	1	Sem	rel	v2-4	D100	L1	185.61	5.22365	-1.26497	6.00881
kc09	240	467	1	Orth	unrel	v2-4	D066	L1	27.09	3.29916	-0.613232	6.14633
kc09	242	562	1	ID	rel	v2-4	D113	L1	9.32	2.23216	0.418691	6.3315
kc09	244	456	0	Morph	rel	v2-4	D017	L1	27.36	3.30908	-0.732718	6.12249
kc09	248	510	1	Sem	unrel	v2-4	D085	L1	54.12	3.9912	-0.146151	6.23441
kc09	254	434	1	Sem	unrel	v2-4	D097	L1	43.85	3.78077	-0.97169	6.07304
kc09	258	511	1	Sem	unrel	v2-4	D098	L1	8.72	2.16562	-0.135289	6.23637
kc09	262	533	1	Sem	unrel	v2-4	D088	L1	2.03	0.708036	0.103683	6.27852
kc09	266	538	0	Sem	unrel	v2-4	D095	L1	1.15	0.139762	0.157994	6.28786
kc09	268	489	1	Morph	rel	v2-4	D034	L1	18.65	2.92585	-0.374261	6.19236
[truncated: 12,340 more rows]
